# Supplementary material for: Reliability, Validity, and Unidimensionality of the Korean Version of the Pornography Craving Questionnaire Based on the Classical Test Theory and Item Response Theory
Source: PubMed Central journal article supplement — Psychiatry Investig. 2021 Jun 17;18(6):530–8. doi: 10.30773/pi.2020.0401 (PMC8256136; doi:10.30773/pi.2020.0401), 2021-06-17
Supplement: pi-2020-0401-suppl1.pdf [file pi-2020-0401-suppl1.pdf]

Supplementary Table 1. The Korean version of the Pornography Craving Questionnaires (PCQ)

| No. | 지시사항: 각 문항에 대해서 얼마나 그렇게 생각하는지 또는 그렇지 않은지를 표시해 주세요. 문항을 읽는 바로 지금 생각을 표시해 주세요. | 절대 그렇지 않다 | 그렇지 않다 | 거의 그렇지 않다 | 그렇기도 하고 안 그렇기도 하다 | 가끔 그런 편이다 | 그런 편이다 | 매우 그렇다 |
|-----|------------------------------------------------------------------------------|-----------|--------|-----------|-------------------|-----------|--------|--------|
| 1   | 음란물을 보는 생각만으로도 성적으로 흥분된다,                                                    | 1         | 2      | 3         | 4                 | 5         | 6      | 7      |
| 2   | 지금 음란물을 본다면 덜 심심할 거 같다.                                                      | 1         | 2      | 3         | 4                 | 5         | 6      | 7      |
| 3   | 기회가 되는대로 바로 음란물을 볼 것이다.                                                      | 1         | 2      | 3         | 4                 | 5         | 6      | 7      |
| 4   | 지금 음란물을 본다면 신날 것 같다.                                                         | 1         | 2      | 3         | 4                 | 5         | 6      | 7      |
| 5   | 지금 음란물을 보고 있다면, 중지하기가 어려울 것이다.                                               | 1         | 2      | 3         | 4                 | 5         | 6      | 7      |
| 6   | 지금 음란물을 보고 싶은 충동이 있다                                                         | 1         | 2      | 3         | 4                 | 5         | 6      | 7      |
| 7   | 지금 음란물을 본다면, 좋겠다.                                                            | 1         | 2      | 3         | 4                 | 5         | 6      | 7      |
| 8   | 여건이 된다면, 지금 음란물을 볼 것이다.                                                      | 1         | 2      | 3         | 4                 | 5         | 6      | 7      |
| 9   | 나는 지금 음란물을 볼 계획을 세우고 있다                                                      | 1         | 2      | 3         | 4                 | 5         | 6      | 7      |
| 10  | 지금 음란물을 본다면, 스트레스가 풀릴 것 같다.                                                  | 1         | 2      | 3         | 4                 | 5         | 6      | 7      |
| 11  | 바로 지금 음란물을 보는 중이라면, 심장이 더 빨리 뛸 것이다.                                          | 1         | 2      | 3         | 4                 | 5         | 6      | 7      |
| 12  | 나는 지금 음란물을 보고 싶다.                                                            | 1         | 2      | 3         | 4                 | 5         | 6      | 7      |
