# Supplementary material for: Reliability, Validity, and Unidimensionality of the Korean Version of the Pornography Craving Questionnaire Based on the Classical Test Theory and Item Response Theory
Source: PubMed Central journal article supplement — Psychiatry Investig. 2021 Jun 17;18(6):530–8. doi: 10.30773/pi.2020.0401 (PMC8256136; doi:10.30773/pi.2020.0401), 2021-06-17
Supplement: pi-2020-0401-suppl2.pdf [file pi-2020-0401-suppl2.pdf]

Supplementary table 2. The response data of the 226 examinees to 12 items 7-point Likert scale

M : men

W : women

A : 18-19 yrs old

B : 20-21 yrs old

C : 22 yrs old or over

P1 - P12 : 12 items of K\_PCQ

Cyber\_Sex\_Add1 -Cyber\_Sex\_Add20 : 20 items of Cyber\_Sex\_Addiction scale

Sex\_impulse1 -Sex\_impulse10 : 10 items of Sexual impulsivity scale of Korean

| Gender | Age | P1 | P2 | P3 | P4 | P5 | P6 | P7 | P8 | P9 | P10 | P11 | P12 | PSUM |
|--------|-----|----|----|----|----|----|----|----|----|----|-----|-----|-----|------|
| M      | C   | 4  | 4  | 4  | 4  | 4  | 3  | 3  | 4  | 4  | 4   | 6   | 4   | 48   |
| M      | C   | 4  | 2  | 4  | 2  | 2  | 2  | 2  | 2  | 3  | 1   | 4   | 2   | 30   |
| M      | A   | 4  | 2  | 2  | 3  | 5  | 4  | 5  | 4  | 2  | 5   | 5   | 3   | 44   |
| M      | C   | 2  | 2  | 5  | 1  | 6  | 2  | 2  | 2  | 1  | 2   | 2   | 2   | 29   |
| M      | A   | 1  | 1  | 1  | 1  | 1  | 1  | 1  | 1  | 1  | 1   | 1   | 1   | 12   |
| M      | B   | 0  | 2  | 1  | 1  | 1  | 1  | 1  | 1  | 1  | 1   | 2   | 1   | 13   |
| W      | A   | 1  | 3  | 2  | 1  | 1  | 4  | 3  | 1  | 1  | 2   | 2   | 1   | 22   |
| M      | B   | 1  | 1  | 1  | 1  | 1  | 1  | 1  | 1  | 1  | 1   | 1   | 1   | 12   |
| M      | C   | 1  | 2  | 2  | 3  | 2  | 2  | 3  | 1  | 1  | 4   | 5   | 1   | 27   |
| M      | B   | 4  | 4  | 2  | 2  | 2  | 2  | 2  | 2  | 2  | 2   | 2   | 2   | 28   |
| W      | B   | 5  | 1  | 1  | 1  | 4  | 4  | 1  | 1  | 1  | 1   | 1   | 1   | 22   |
| W      | A   | 2  | 2  | 2  | 2  | 2  | 2  | 2  | 2  | 2  | 2   | 2   | 2   | 24   |
| W      | A   | 2  | 4  | 3  | 4  | 1  | 3  | 3  | 3  | 3  | 2   | 1   | 3   | 32   |
| W      | A   | 1  | 1  | 4  | 4  | 1  | 1  | 1  | 1  | 1  | 1   | 1   | 1   | 18   |
| W      | C   | 5  | 4  | 2  | 3  | 2  | 4  | 1  | 1  | 1  | 3   | 2   | 1   | 29   |
| W      | C   | 4  | 4  | 4  | 2  | 1  | 1  | 1  | 1  | 1  | 2   | 2   | 2   | 25   |
| M      | A   | 4  | 1  | 1  | 1  | 1  | 1  | 1  | 1  | 1  | 1   | 1   | 1   | 15   |
| M      | C   | 3  | 3  | 2  | 2  | 2  | 1  | 1  | 1  | 1  | 1   | 4   | 1   | 22   |
| W      | B   | 1  | 1  | 1  | 1  | 1  | 1  | 1  | 1  | 1  | 1   | 1   | 1   | 12   |
| W      | A   | 4  | 1  | 1  | 1  | 1  | 1  | 1  | 1  | 1  | 1   | 1   | 1   | 15   |
| W      | A   | 2  | 1  | 2  | 2  | 1  | 1  | 1  | 2  | 1  | 1   | 1   | 1   | 16   |





|   |   |   |   |   |   |   |   |   |   |   |   |   |   |    |
|---|---|---|---|---|---|---|---|---|---|---|---|---|---|----|
| M | C | 3 | 1 | 3 | 3 | 1 | 2 | 1 | 1 | 1 | 1 | 3 | 2 | 22 |
| M | C | 4 | 3 | 0 | 2 | 1 | 3 | 3 | 2 | 4 | 2 | 2 | 2 | 28 |
| M | A | 2 | 2 | 2 | 2 | 2 | 2 | 2 | 2 | 2 | 2 | 2 | 2 | 24 |
| W | C | 2 | 1 | 1 | 1 | 1 | 1 | 1 | 1 | 1 | 1 | 1 | 1 | 13 |
| M | A | 4 | 2 | 2 | 3 | 4 | 4 | 1 | 1 | 2 | 3 | 4 | 2 | 32 |
| M | C | 2 | 4 | 2 | 2 | 5 | 1 | 1 | 2 | 2 | 4 | 4 | 2 | 31 |
| M | C | 2 | 2 | 1 | 3 | 4 | 2 | 2 | 2 | 2 | 3 | 5 | 2 | 30 |
| M | C | 3 | 3 | 3 | 3 | 3 | 3 | 3 | 3 | 3 | 3 | 3 | 3 | 36 |
| W | C | 4 | 2 | 2 | 2 | 3 | 1 | 1 | 1 | 1 | 1 | 4 | 1 | 23 |
| W | C | 3 | 2 | 2 | 2 | 2 | 2 | 2 | 2 | 2 | 2 | 2 | 2 | 25 |
| W | C | 5 | 1 | 1 | 1 | 1 | 1 | 1 | 1 | 1 | 1 | 1 | 1 | 16 |
| M | B | 2 | 1 | 1 | 1 | 1 | 1 | 1 | 1 | 1 | 1 | 1 | 1 | 13 |
| M | B | 5 | 4 | 4 | 3 | 4 | 3 | 3 | 3 | 3 | 3 | 4 | 3 | 42 |
| M | B | 4 | 1 | 1 | 1 | 1 | 1 | 1 | 1 | 1 | 1 | 1 | 1 | 15 |
| M | B | 2 | 2 | 2 | 2 | 2 | 2 | 2 | 2 | 2 | 2 | 4 | 2 | 26 |
| M | B | 1 | 2 | 2 | 2 | 1 | 1 | 1 | 1 | 1 | 1 | 1 | 1 | 15 |
| M | A | 4 | 4 | 2 | 2 | 3 | 2 | 2 | 2 | 2 | 2 | 7 | 2 | 34 |
| M | B | 5 | 5 | 5 | 5 | 5 | 5 | 5 | 5 | 5 | 5 | 4 | 5 | 59 |
| M | A | 1 | 1 | 1 | 1 | 1 | 1 | 1 | 1 | 1 | 1 | 7 | 1 | 18 |
| M | B | 4 | 2 | 4 | 4 | 1 | 1 | 1 | 1 | 1 | 5 | 1 | 1 | 26 |
| M | B | 4 | 7 | 4 | 4 | 1 | 2 | 4 | 4 | 1 | 5 | 7 | 5 | 48 |
| W | C | 2 | 2 | 2 | 1 | 1 | 4 | 2 | 2 | 2 | 2 | 2 | 2 | 24 |
| M | C | 7 | 7 | 6 | 7 | 7 | 6 | 7 | 7 | 6 | 7 | 4 | 7 | 78 |
| M | B | 3 | 2 | 4 | 2 | 2 | 2 | 2 | 2 | 2 | 3 | 3 | 4 | 31 |
| M | B | 4 | 3 | 3 | 3 | 1 | 1 | 1 | 1 | 1 | 1 | 1 | 1 | 21 |
| M | B | 3 | 3 | 3 | 3 | 4 | 3 | 2 | 4 | 2 | 2 | 4 | 1 | 34 |
| M | B | 3 | 4 | 2 | 2 | 3 | 2 | 2 | 2 | 2 | 2 | 6 | 2 | 32 |
| M | B | 2 | 2 | 2 | 2 | 2 | 3 | 2 | 2 | 2 | 2 | 2 | 4 | 27 |
| M | B | 2 | 2 | 2 | 2 | 1 | 1 | 1 | 1 | 1 | 1 | 1 | 1 | 16 |
| M | C | 1 | 1 | 1 | 1 | 1 | 4 | 1 | 1 | 1 | 1 | 1 | 1 | 15 |
| W | B | 4 | 4 | 4 | 3 | 2 | 2 | 2 | 3 | 2 | 2 | 2 | 2 | 32 |
| M | C | 1 | 1 | 1 | 1 | 1 | 1 | 1 | 1 | 1 | 1 | 1 | 1 | 12 |
| M | B | 4 | 4 | 3 | 3 | 4 | 3 | 3 | 3 | 3 | 5 | 5 | 3 | 43 |
| M | C | 2 | 3 | 2 | 2 | 4 | 2 | 2 | 3 | 2 | 3 | 5 | 3 | 33 |
| M | C | 4 | 5 | 2 | 1 | 3 | 5 | 1 | 1 | 1 | 1 | 5 | 1 | 30 |
| M | B | 1 | 2 | 2 | 2 | 2 | 2 | 2 | 2 | 2 | 2 | 2 | 1 | 22 |
| W | C | 1 | 1 | 1 | 1 | 1 | 1 | 1 | 1 | 1 | 1 | 1 | 1 | 12 |
| W | B | 4 |   | 1 | 1 | 1 | 1 | 1 | 1 | 1 | 1 | 4 | 1 | 17 |
| W | B | 4 | 4 | 4 | 4 | 3 | 4 | 2 | 1 | 1 | 1 | 4 | 1 | 33 |

|   |   |   |   |   |   |   |   |   |   |   |   |   |   |    |
|---|---|---|---|---|---|---|---|---|---|---|---|---|---|----|
| W | C | 2 | 2 | 2 | 2 | 2 | 2 | 2 | 1 | 1 | 1 | 5 | 2 | 24 |
| M | B | 5 | 6 | 3 | 4 | 2 | 2 | 4 | 4 | 3 | 4 | 5 | 3 | 45 |
| M | C | 6 | 6 | 7 | 7 | 6 | 6 | 6 | 5 | 4 | 6 | 7 | 6 | 72 |
| M | C | 2 | 1 | 1 | 1 | 1 | 1 | 1 | 1 | 1 | 1 | 1 | 1 | 13 |
| M | B | 1 | 2 | 1 | 1 | 1 | 1 | 3 | 1 | 1 | 1 | 1 | 1 | 15 |
| W | C | 1 | 1 | 1 | 1 | 1 | 1 | 1 | 1 | 1 | 1 | 5 | 1 | 16 |
| W | B | 4 | 5 | 2 | 0 | 2 | 5 | 2 | 3 | 1 | 4 | 3 | 2 | 33 |
| M | B | 6 | 2 | 4 | 3 | 3 | 5 | 5 | 5 | 2 | 1 | 6 | 6 | 48 |
| W | A | 2 | 1 | 4 | 3 | 2 | 1 | 2 | 4 | 3 | 1 | 5 | 1 | 29 |
| M | B | 4 | 2 | 1 | 2 | 2 | 2 | 3 | 2 | 3 | 4 | 7 | 3 | 35 |
| M | B | 2 | 3 | 1 | 1 | 1 | 1 | 1 | 1 | 4 | 1 | 1 | 1 | 18 |
| M | C | 3 | 2 | 2 | 3 | 4 | 2 | 1 | 2 | 1 | 2 | 5 | 2 | 29 |
| W | B | 5 | 3 | 1 | 3 | 1 | 1 | 4 | 1 | 1 | 1 | 4 | 3 | 28 |
| M | B | 3 | 3 | 3 | 2 | 2 | 1 | 1 | 4 | 1 | 2 | 2 | 2 | 26 |
| M | A | 4 | 2 | 3 | 3 | 2 | 4 | 5 | 3 | 1 | 2 | 4 | 4 | 37 |
| M | B | 6 | 2 | 1 | 5 | 3 | 2 | 5 | 2 | 2 | 1 | 5 | 2 | 36 |
| M | B | 2 | 1 | 1 | 1 | 1 | 1 | 1 | 1 | 1 | 1 | 5 | 1 | 17 |
| W | B | 3 | 1 | 1 | 1 | 1 | 1 | 1 | 2 | 1 | 1 | 1 | 2 | 16 |
| M | A | 4 | 3 | 3 | 3 | 4 | 4 | 3 | 3 | 3 | 3 | 6 | 3 | 42 |
| M | B | 4 | 4 | 4 | 4 | 4 | 4 | 4 | 4 | 4 | 4 | 4 | 4 | 48 |
| M | B | 4 | 5 | 2 | 4 | 6 | 2 | 3 | 4 | 2 | 3 | 5 | 3 | 43 |
| M | B | 2 | 3 | 4 | 2 | 5 | 2 | 3 | 4 | 4 | 2 | 5 | 3 | 39 |
| M | B | 5 | 4 | 5 | 3 | 4 | 3 | 3 | 4 | 2 | 3 | 6 | 4 | 46 |
| W | B | 1 | 2 | 1 | 1 | 2 | 2 | 1 | 1 | 1 | 1 | 4 | 2 | 19 |
| M | C | 4 | 4 | 4 | 4 | 1 | 2 | 4 | 2 | 4 | 4 | 6 | 4 | 43 |
| M | C | 3 | 2 | 2 | 1 | 1 | 2 | 2 | 2 | 1 | 1 | 2 | 1 | 20 |
| M | B | 2 | 2 | 2 | 2 | 2 | 2 | 2 | 2 | 2 | 2 | 4 | 2 | 26 |
| W | A | 1 | 1 | 1 | 1 | 1 | 1 | 1 | 1 | 1 | 1 | 1 | 1 | 12 |
| M | B | 2 | 1 | 1 | 1 | 2 | 1 | 1 | 1 | 1 | 1 | 1 | 1 | 14 |
| M | C | 2 | 1 | 1 | 1 | 2 | 1 | 1 | 1 | 1 | 1 | 1 | 2 | 15 |
| M | B | 6 | 6 | 6 | 6 | 4 | 2 | 2 | 2 | 2 | 2 | 2 | 2 | 42 |
| M | A | 7 | 1 | 2 | 1 | 1 | 1 | 1 | 1 | 1 | 4 | 7 | 1 | 28 |
| M | B | 3 | 6 | 5 | 4 | 6 | 3 | 4 | 4 | 3 | 3 | 5 | 3 | 49 |
| M | C | 2 | 7 | 2 | 4 | 3 | 1 | 1 | 2 | 1 | 4 | 6 | 2 | 35 |
| W | C | 1 | 1 | 1 | 1 | 1 | 1 | 1 | 1 | 1 | 1 | 1 | 1 | 12 |
| M | C | 2 | 2 | 2 | 2 | 4 | 2 | 2 | 2 | 2 | 4 | 4 | 2 | 30 |
| M | A | 2 | 3 | 2 | 1 | 3 | 2 | 2 | 2 | 1 | 2 | 5 | 2 | 27 |
| W | A | 4 | 4 | 4 | 4 | 3 | 3 | 3 | 4 | 3 | 3 | 3 | 3 | 41 |
| M | B | 7 | 1 | 1 | 6 | 2 | 2 | 2 | 1 | 1 | 5 | 6 | 1 | 35 |



|   |   |   |   |   |   |   |   |   |   |   |   |   |   |    |
|---|---|---|---|---|---|---|---|---|---|---|---|---|---|----|
| M | C | 4 | 2 | 3 | 2 | 2 | 1 | 1 | 1 | 1 | 1 | 1 | 1 | 20 |
| M | C | 3 | 1 | 1 | 1 | 2 | 2 | 3 | 1 | 1 | 1 | 1 | 1 | 18 |
| M | A | 1 | 1 | 1 | 1 | 1 | 1 | 1 | 1 | 1 | 1 | 4 | 1 | 15 |
| M | A | 4 | 2 | 1 | 1 | 1 | 1 | 1 | 1 | 1 | 1 | 1 | 1 | 16 |
| M | B | 1 | 1 | 1 | 1 | 1 | 1 | 1 | 1 | 1 | 1 | 1 | 1 | 12 |
| M | A | 4 | 4 | 2 | 1 | 1 | 1 | 1 | 1 | 1 | 1 | 1 | 1 | 19 |
| M | A | 5 | 4 | 2 | 2 | 2 | 3 | 2 | 2 | 2 | 2 | 2 | 2 | 30 |
| M | A | 1 | 1 | 1 | 1 | 1 | 1 | 1 | 1 | 1 | 1 | 1 | 1 | 12 |
| W | A | 4 | 3 | 3 | 3 | 4 | 2 | 3 | 2 | 2 | 2 | 3 | 2 | 33 |
| W | A | 1 | 2 | 1 | 1 | 1 | 1 | 1 | 1 | 1 | 1 | 1 | 1 | 13 |

| Gender | Age | Cyber_Sex_Add1 | Cyber_Sex_Add2 | Cyber_Sex_Add3 | Cyber_Sex_Add4 | Cyber_Sex_Add5 | Cyber_Sex_Add6 | Cyber_Sex_Add7 | Cyber_Sex_Add8 | Cyber_Sex_Add9 | Cyber_Sex_Add10 | Cyber_Sex_Add11 | Cyber_Sex_Add12 | Cyber_Sex_Add13 | Cyber_Sex_Add14 | Cyber_Sex_Add15 | Cyber_Sex_Add16 | Cyber_Sex_Add17 | Cyber_Sex_Add18 | Cyber_Sex_Add19 | Cyber_Sex_Add20 | Cyber_Sex_Add_SUM |
|--------|-----|----------------|----------------|----------------|----------------|----------------|----------------|----------------|----------------|----------------|-----------------|-----------------|-----------------|-----------------|-----------------|-----------------|-----------------|-----------------|-----------------|-----------------|-----------------|-------------------|
| M      | C   | 4              | 4              | 4              | 4              | 4              | 3              | 3              | 4              | 4              | 4               | 6               | 4               | 48              | 3               | 1               | 1               | 1               | 1               | 3               | 2               | 2                 |
| M      | C   | 4              | 2              | 4              | 2              | 2              | 2              | 2              | 2              | 3              | 1               | 4               | 2               | 30              | 3               | 3               | 3               | 1               | 1               | 1               | 1               | 1                 |
| M      | A   | 4              | 2              | 2              | 3              | 5              | 4              | 5              | 4              | 2              | 5               | 5               | 3               | 44              | 1               | 1               | 1               | 1               | 1               | 1               | 1               | 1                 |
| M      | C   | 2              | 2              | 5              | 1              | 6              | 2              | 2              | 2              | 1              | 2               | 2               | 2               | 29              | 4               | 6               | 6               | 1               | 1               | 3               | 1               | 1                 |
| M      | A   | 1              | 1              | 1              | 1              | 1              | 1              | 1              | 1              | 1              | 1               | 1               | 1               | 12              | 1               | 1               | 1               | 1               | 1               | 1               | 1               | 1                 |
| M      | B   | 0              | 2              | 1              | 1              | 1              | 1              | 1              | 1              | 1              | 1               | 2               | 1               | 13              | 1               | 1               | 1               | 2               | 1               | 1               | 1               | 1                 |
| W      | A   | 1              | 3              | 2              | 1              | 1              | 4              | 3              | 1              | 1              | 2               | 2               | 1               | 22              | 6               | 1               | 1               | 3               | 1               | 1               | 1               | 1                 |
| M      | B   | 1              | 1              | 1              | 1              | 1              | 1              | 1              | 1              | 1              | 1               | 1               | 1               | 12              | 1               | 1               | 1               | 1               | 1               | 1               | 1               | 1                 |
| M      | C   | 1              | 2              | 2              | 3              | 2              | 2              | 3              | 1              | 1              | 4               | 5               | 1               | 27              | 2               | 1               | 1               | 1               | 2               | 1               | 1               | 1                 |
| M      | B   | 4              | 4              | 2              | 2              | 2              | 2              | 2              | 2              | 2              | 2               | 2               | 2               | 28              | 1               | 1               | 1               | 1               | 1               | 1               | 1               | 1                 |
| W      | B   | 5              | 1              | 1              | 1              | 4              | 4              | 1              | 1              | 1              | 1               | 1               | 1               | 22              | 6               | 2               | 1               | 1               | 2               | 2               | 1               | 1                 |
| W      | A   | 2              | 2              | 2              | 2              | 2              | 2              | 2              | 2              | 2              | 2               | 2               | 2               | 24              | 1               | 1               | 1               | 1               | 1               | 1               | 1               | 1                 |
| W      | A   | 2              | 4              | 3              | 4              | 1              | 3              | 3              | 3              | 3              | 2               | 1               | 3               | 32              | 3               | 1               | 1               | 1               | 1               | 2               | 1               | 2                 |
| W      | A   | 1              | 1              | 4              | 4              | 1              | 1              | 1              | 1              | 1              | 1               | 1               | 1               | 18              | 1               | 1               | 1               | 1               | 1               | 3               | 1               | 1                 |
| W      | C   | 5              | 4              | 2              | 3              | 2              | 4              | 1              | 1              | 1              | 3               | 2               | 1               | 29              | 2               | 1               | 1               | 1               | 1               | 1               | 1               | 1                 |
| W      | C   | 4              | 4              | 4              | 2              | 1              | 1              | 1              | 1              | 1              | 2               | 2               | 2               | 25              | 1               | 1               | 1               | 1               | 1               | 1               | 1               | 1                 |
| M      | A   | 4              | 1              | 1              | 1              | 1              | 1              | 1              | 1              | 1              | 1               | 1               | 1               | 15              | 1               | 1               | 1               | 1               | 1               | 1               | 1               | 1                 |
| M      | C   | 3              | 3              | 2              | 2              | 2              | 1              | 1              | 1              | 1              | 1               | 4               | 1               | 22              | 1               | 1               | 1               | 1               | 1               | 1               | 1               | 1                 |
| W      | B   | 1              | 1              | 1              | 1              | 1              | 1              | 1              | 1              | 1              | 1               | 1               | 1               | 12              | 1               | 1               | 1               | 1               | 1               | 1               | 1               | 1                 |
| W      | A   | 4              | 1              | 1              | 1              | 1              | 1              | 1              | 1              | 1              | 1               | 1               | 1               | 15              | 1               | 1               | 1               | 1               | 1               | 1               | 1               | 1                 |
| W      | A   | 2              | 1              | 2              | 2              | 1              | 1              | 1              | 2              | 1              | 1               | 1               | 1               | 16              | 1               | 1               | 1               | 1               | 1               | 1               | 1               | 1                 |
| M      | A   | 3              | 2              | 1              | 2              | 1              | 1              | 1              | 1              | 1              | 1               | 4               | 1               | 19              | 3               | 1               | 1               | 2               | 1               | 3               | 1               | 2                 |

|   |   |   |   |   |   |   |   |   |   |   |   |   |   |    |   |   |   |   |   |   |   |
|---|---|---|---|---|---|---|---|---|---|---|---|---|---|----|---|---|---|---|---|---|---|
| W | B | 1 | 4 | 1 | 4 | 1 | 2 | 1 | 1 | 1 | 4 | 3 | 2 | 25 | 1 | 1 | 1 | 1 | 1 | 1 | 1 |
| W | A | 3 | 1 | 1 | 1 | 1 | 3 | 1 | 1 | 1 | 1 | 1 | 1 | 16 | 1 | 1 | 1 | 1 | 1 | 1 | 1 |
| W | A | 2 | 2 | 2 | 2 | 2 | 2 | 2 | 2 | 2 | 2 | 2 | 2 | 24 | 1 | 1 | 1 | 1 | 1 | 2 | 1 |
| M | A | 2 | 3 | 2 | 3 | 4 | 3 | 3 | 4 | 2 | 3 | 5 | 5 | 39 | 4 | 3 | 1 | 1 | 2 | 2 | 1 |
| M | C | 2 | 2 | 1 | 1 | 2 | 1 | 1 | 1 | 1 | 1 | 1 | 1 | 15 | 2 | 1 | 1 | 1 | 1 | 2 | 1 |
| M | C | 5 | 4 | 2 | 1 | 3 | 1 | 1 | 2 | 1 | 1 | 6 | 1 | 28 | 1 | 2 | 1 | 1 | 1 | 2 | 1 |
| M | C | 4 | 5 | 5 | 2 | 2 | 1 | 1 | 4 | 1 | 1 | 1 | 1 | 28 | 2 | 1 | 1 | 2 | 1 | 3 | 2 |
| W | A | 3 | 2 | 1 | 1 | 1 | 2 | 2 | 2 | 2 | 1 | 0 | 2 | 19 | 1 | 1 | 1 | 1 | 1 | 1 | 1 |
| W | B | 1 | 2 | 1 | 1 | 1 | 1 | 1 | 1 | 1 | 1 | 1 | 1 | 13 | 1 | 1 | 1 | 3 | 1 | 1 | 1 |
| W | B | 2 | 2 | 2 | 2 | 2 | 3 | 1 | 2 | 1 | 4 | 5 | 2 | 28 | 1 | 1 | 1 | 1 | 1 | 2 | 1 |
| W | B | 4 | 1 | 2 | 2 | 1 | 2 | 2 | 3 | 1 | 2 | 4 | 2 | 26 | 3 | 1 | 1 | 1 | 1 | 2 | 1 |
| W | B | 2 | 4 | 2 | 1 | 2 | 1 | 1 | 2 | 1 | 2 | 4 | 1 | 23 | 1 | 1 | 1 | 4 | 1 | 1 | 2 |
| W | C | 4 | 3 | 2 | 3 | 2 | 3 | 3 | 2 | 1 | 3 | 3 | 1 | 30 | 0 | 1 | 1 | 1 | 1 | 2 | 1 |
| M | C | 4 | 1 | 2 | 2 | 2 | 2 | 2 | 2 | 2 | 2 | 2 | 2 | 25 | 1 | 1 | 1 | 1 | 1 | 2 | 1 |
| M | B | 5 | 1 | 1 | 1 | 1 | 1 | 1 | 1 | 1 | 1 | 5 | 1 | 20 | 1 | 1 | 1 | 1 | 1 | 1 | 1 |
| M | B | 4 | 4 | 1 | 1 | 1 | 1 | 1 | 1 | 1 | 1 | 1 | 1 | 18 | 3 | 1 | 1 | 1 | 1 | 1 | 1 |
| W | B | 1 | 1 | 1 | 1 | 1 | 1 | 1 | 1 | 1 | 1 | 1 | 1 | 12 | 2 | 1 | 1 | 1 | 1 | 1 | 1 |
| W | C | 2 | 2 | 2 | 2 | 2 | 2 | 2 | 2 | 2 | 2 | 2 | 2 | 24 | 1 | 1 | 1 | 1 | 1 | 1 | 1 |
| W | C | 3 | 3 | 1 | 1 | 1 | 1 | 1 | 1 | 1 | 1 | 1 | 1 | 16 | 1 | 1 | 1 | 1 | 1 | 1 | 1 |
| M | A | 4 | 2 | 3 | 2 | 3 | 2 | 2 | 2 | 2 | 2 | 2 | 2 | 28 | 2 | 3 | 2 | 1 | 1 | 2 | 2 |
| W | A | 1 | 1 | 1 | 1 | 1 | 1 | 1 | 1 | 1 | 1 | 1 | 1 | 12 | 1 | 1 | 1 | 1 | 1 | 1 | 1 |
| M | C | 1 | 1 | 1 | 1 | 1 | 1 | 1 | 1 | 1 | 1 | 1 | 1 | 12 | 1 | 1 | 1 | 1 | 1 | 1 | 1 |
| M | A | 3 | 3 | 2 | 2 | 4 | 3 | 4 | 3 | 2 | 3 | 4 | 3 | 36 | 2 | 2 | 2 | 1 | 2 | 2 | 1 |
| M | A | 2 | 2 | 1 | 1 | 1 | 1 | 1 | 1 | 1 | 1 | 4 | 1 | 17 | 1 | 1 | 1 | 2 | 1 | 1 | 1 |
| M | A | 4 | 4 | 2 | 4 | 1 | 1 | 1 | 1 | 1 | 4 | 6 | 1 | 30 | 4 | 1 | 1 | 1 | 1 | 3 | 1 |
| M | A | 5 | 4 | 3 | 4 | 1 | 3 | 4 | 4 | 2 | 5 | 3 | 2 | 40 | 3 | 1 | 1 | 1 | 1 | 5 | 1 |
| W | C | 2 | 2 | 2 | 2 | 2 | 4 | 2 | 2 | 2 | 2 | 4 | 2 | 28 | 1 | 1 | 1 | 1 | 1 | 1 | 1 |
| W | C | 2 | 2 | 2 | 3 | 3 | 3 | 3 | 3 | 3 | 3 | 3 | 3 | 33 | 1 | 1 | 1 | 1 | 1 | 1 | 1 |
| W | C | 5 | 1 | 1 | 1 | 1 | 1 | 1 | 1 | 1 | 1 | 5 | 1 | 20 | 3 | 1 | 1 | 1 | 1 | 2 | 1 |
| W | A | 1 | 1 | 1 | 1 | 1 | 1 | 1 | 1 | 1 | 1 | 4 | 1 | 15 | 1 | 1 | 1 | 1 | 1 | 2 | 1 |
| M | A | 4 | 2 | 2 | 2 | 2 | 2 | 2 | 2 | 2 | 2 | 4 | 2 | 28 | 2 | 1 | 3 | 1 | 1 | 1 | 3 |
| M | C | 4 | 2 | 1 | 2 | 1 | 1 | 1 | 1 | 1 | 1 | 4 | 1 | 20 | 1 | 1 | 1 | 1 | 1 | 1 | 1 |
| M | C | 4 | 3 | 2 | 2 | 2 | 2 | 2 | 2 | 2 | 3 | 2 | 1 | 27 | 1 | 1 | 1 | 1 | 1 | 1 | 2 |
| M | C | 4 | 4 | 3 | 4 | 5 | 5 | 3 | 4 | 2 | 3 | 4 | 2 | 43 | 2 | 2 | 1 | 1 | 1 | 3 | 3 |
| W | C | 3 | 3 | 3 | 1 | 1 | 2 | 1 | 3 | 2 | 1 | 3 | 1 | 24 | 1 | 1 | 1 | 1 | 1 | 1 | 1 |
| W | C | 1 | 1 | 1 | 1 | 1 | 1 | 1 | 1 | 1 | 1 | 1 | 1 | 12 | 1 | 1 | 1 | 1 | 1 | 1 | 1 |
| W | C | 4 | 2 | 1 | 1 | 2 | 1 | 1 | 1 | 1 | 1 | 3 | 1 | 19 | 1 | 1 | 1 | 1 | 1 | 1 | 1 |
| W | B | 2 | 2 | 2 | 2 | 2 | 2 | 2 | 2 | 2 | 2 | 2 | 2 | 24 | 2 | 1 | 1 | 1 | 1 | 2 | 1 |
| W | B | 6 | 6 | 6 | 6 | 2 | 2 | 2 | 2 | 2 | 2 | 2 | 2 | 40 | 3 | 3 | 3 | 1 | 1 | 2 | 1 |



|   |   |   |   |   |   |   |   |   |   |   |   |   |   |    |   |   |   |   |   |   |   |
|---|---|---|---|---|---|---|---|---|---|---|---|---|---|----|---|---|---|---|---|---|---|
| W | A | 4 | 4 | 1 | 1 | 1 | 1 | 1 | 1 | 1 | 1 | 1 | 1 | 18 | 2 | 1 | 1 | 1 | 1 | 1 | 1 |
| M | B | 5 | 2 | 2 | 2 | 2 | 2 | 2 | 2 | 2 | 2 | 4 | 1 | 28 | 2 | 1 | 1 | 1 | 1 | 1 | 1 |
| M | A | 3 | 2 | 1 | 2 | 3 | 2 | 2 | 1 | 1 | 1 | 4 | 2 | 24 | 3 | 2 | 1 | 1 | 1 | 2 | 3 |
| W | B | 2 | 2 | 2 | 2 | 2 | 2 | 2 | 2 | 2 | 2 | 2 | 2 | 24 | 2 | 1 | 1 | 1 | 1 | 2 | 1 |
| M | C | 1 | 3 | 1 | 1 | 2 | 2 | 3 | 1 | 1 | 4 | 3 | 3 | 25 | 2 | 1 | 1 | 1 | 1 | 1 | 1 |
| W | B | 5 | 6 | 4 | 5 | 5 | 4 | 4 | 4 | 2 | 5 | 3 | 2 | 49 | 4 | 2 | 2 | 2 | 3 | 4 | 4 |
| M | C | 4 | 5 | 5 | 5 | 6 | 2 | 2 | 2 | 1 | 2 | 6 | 5 | 45 | 3 | 2 | 1 | 2 | 5 | 4 | 4 |
| M | A | 4 | 4 | 3 | 3 | 3 | 3 | 3 | 3 | 3 | 3 | 3 | 3 | 38 | 1 | 1 | 1 | 2 | 1 | 1 | 1 |
| M | A | 4 | 4 | 2 | 2 | 2 | 2 | 2 | 2 | 2 | 2 | 2 | 1 | 27 | 1 | 1 | 1 | 1 | 1 | 2 | 1 |
| M | A | 1 | 1 | 1 | 1 | 1 | 1 | 1 | 1 | 1 | 1 | 1 | 1 | 12 | 1 | 1 | 1 | 2 | 1 | 3 | 1 |
| W | C | 2 | 1 | 1 | 1 | 1 | 1 | 1 | 1 | 1 | 1 | 1 | 1 | 13 | 1 | 1 | 1 | 2 | 1 | 2 | 1 |
| M | C | 2 | 1 | 1 | 1 | 1 | 1 | 1 | 1 | 1 | 1 | 1 | 1 | 13 | 1 | 1 | 1 | 1 | 1 | 1 | 1 |
| M | C | 4 | 1 | 1 | 4 | 3 | 1 | 2 | 1 | 1 | 3 | 2 | 1 | 24 | 1 | 1 | 1 | 1 | 1 | 3 | 1 |
| W | A | 2 | 1 | 1 | 1 | 1 | 1 | 1 | 1 | 1 | 1 | 1 | 1 | 13 | 0 | 2 | 3 | 1 | 1 | 2 | 1 |
| W | C | 4 | 3 | 4 | 2 | 2 | 2 | 2 | 2 | 2 | 2 | 2 | 2 | 29 | 1 | 1 | 1 | 1 | 1 | 1 | 1 |
| M | C | 4 | 3 | 2 | 2 | 2 | 2 | 2 | 2 | 2 | 2 | 2 | 2 | 27 | 1 | 1 | 1 | 1 | 1 | 1 | 1 |
| M | C | 7 | 7 | 7 | 7 | 7 | 7 | 7 | 7 | 7 | 7 | 7 | 7 | 84 | 6 | 6 | 6 | 6 | 6 | 6 | 6 |
| W | B | 2 | 2 | 2 | 2 | 2 | 2 | 2 | 2 | 2 | 2 | 2 | 2 | 24 | 2 | 1 | 1 | 3 | 1 | 4 | 1 |
| M | C | 5 | 5 | 6 | 4 | 4 | 5 | 5 | 5 | 4 | 5 | 5 | 4 | 57 | 4 | 4 | 4 | 4 | 4 | 4 | 4 |
| M | B | 2 | 2 | 2 | 2 | 2 | 1 | 1 | 1 | 1 | 1 | 1 | 1 | 17 | 1 | 1 | 1 | 1 | 1 | 1 | 1 |
| M | C | 3 | 2 | 1 | 1 | 1 | 1 | 1 | 1 | 1 | 1 | 1 | 1 | 15 | 1 | 1 | 1 | 1 | 1 | 1 | 1 |
| W | C | 2 | 2 | 1 | 1 | 3 | 2 | 2 | 2 | 1 | 1 | 3 | 2 | 22 | 1 | 1 | 1 | 1 | 1 | 1 | 1 |
| M | C | 4 | 2 | 2 | 2 | 2 | 2 | 2 | 2 | 2 | 4 | 2 | 2 | 28 | 2 | 1 | 1 | 1 | 1 | 2 | 1 |
| M | C | 4 | 7 | 7 | 7 | 1 | 2 | 7 | 4 | 7 | 3 | 3 | 7 | 59 | 1 | 1 | 1 | 1 | 1 | 1 | 1 |
| W | A | 2 | 1 | 1 | 1 | 2 | 1 | 1 | 1 | 1 | 1 | 2 | 1 | 15 | 3 | 1 | 1 | 1 | 1 | 1 | 1 |
| W | C | 1 | 1 | 1 | 1 | 1 | 1 | 1 | 1 | 1 | 1 | 3 | 1 | 14 | 1 | 1 | 1 | 1 | 1 | 2 | 1 |
| W | A | 2 | 1 | 1 | 1 | 1 | 1 | 1 | 1 | 1 | 1 | 4 | 1 | 16 | 1 | 1 | 1 | 1 | 1 | 1 | 1 |
| M | C | 2 | 3 | 4 | 2 | 1 | 3 | 3 | 3 | 2 | 2 | 1 | 4 | 30 | 2 | 1 | 1 | 1 | 1 | 6 | 1 |
| M | C | 4 | 2 | 2 | 1 | 2 | 2 | 2 | 2 | 2 | 1 | 5 | 1 | 26 | 1 | 1 | 1 | 1 | 1 | 2 | 1 |
| M | C | 4 | 6 | 3 | 2 | 7 | 1 | 1 | 1 | 1 | 2 | 2 | 2 | 32 | 2 | 2 | 1 | 1 | 1 | 1 | 1 |
| M | C | 4 | 4 | 4 | 4 | 2 | 4 | 4 | 2 | 2 | 2 | 2 | 2 | 36 | 1 | 3 | 1 | 1 | 1 | 1 | 1 |
| W | A | 1 | 1 | 1 | 2 | 2 | 1 | 1 | 1 | 1 | 1 | 3 | 1 | 16 | 1 | 1 | 1 | 1 | 1 | 1 | 1 |
| W | C | 2 | 2 | 2 | 2 | 1 | 1 | 1 | 2 | 2 | 1 | 3 | 1 | 20 | 1 | 1 | 1 | 1 | 1 | 1 | 1 |
| M | A | 1 | 1 | 1 | 1 | 1 | 1 | 1 | 1 | 1 | 1 | 1 | 1 | 12 | 1 | 1 | 1 | 1 | 1 | 1 | 1 |
| M | C | 2 | 2 | 2 | 2 | 2 | 2 | 2 | 2 | 2 | 2 | 2 | 2 | 24 | 1 | 1 | 1 | 1 | 1 | 1 | 1 |
| M | C | 3 | 2 | 1 | 1 | 1 | 1 | 1 | 1 | 1 | 1 | 1 | 1 | 15 | 1 | 1 | 1 | 1 | 1 | 1 | 1 |
| W | B | 2 | 1 | 1 | 1 | 1 | 1 | 1 | 1 | 1 | 1 | 1 | 1 | 13 | 1 | 1 | 1 | 1 | 1 | 1 | 1 |
| W | A | 2 | 2 | 2 | 4 | 2 | 2 | 2 | 2 | 2 | 2 | 2 | 2 | 26 | 2 | 1 | 1 | 1 | 1 | 1 | 1 |
| M | C | 3 | 1 | 3 | 3 | 1 | 2 | 1 | 1 | 1 | 1 | 3 | 2 | 22 | 1 | 1 | 1 | 1 | 1 | 2 | 1 |

|   |   |   |   |   |   |   |   |   |   |   |   |   |   |    |   |   |   |   |   |   |   |   |
|---|---|---|---|---|---|---|---|---|---|---|---|---|---|----|---|---|---|---|---|---|---|---|
| M | C | 4 | 3 | 0 | 2 | 1 | 3 | 3 | 2 | 4 | 2 | 2 | 2 | 28 | 1 | 2 | 2 | 1 | 1 | 1 | 1 | 2 |
| M | A | 2 | 2 | 2 | 2 | 2 | 2 | 2 | 2 | 2 | 2 | 2 | 2 | 24 | 1 | 1 | 1 | 1 | 1 | 1 | 1 | 1 |
| W | C | 2 | 1 | 1 | 1 | 1 | 1 | 1 | 1 | 1 | 1 | 1 | 1 | 13 | 1 | 1 | 1 | 1 | 1 | 1 | 1 | 1 |
| M | A | 4 | 2 | 2 | 3 | 4 | 4 | 1 | 1 | 2 | 3 | 4 | 2 | 32 | 2 | 1 | 1 | 1 | 1 | 1 | 2 | 2 |
| M | C | 2 | 4 | 2 | 2 | 5 | 1 | 1 | 2 | 2 | 4 | 4 | 2 | 31 | 3 | 2 | 4 | 3 | 2 | 3 | 1 | 3 |
| M | C | 2 | 2 | 1 | 3 | 4 | 2 | 2 | 2 | 2 | 3 | 5 | 2 | 30 | 2 | 1 | 1 | 2 | 1 | 1 | 1 | 1 |
| M | C | 3 | 3 | 3 | 3 | 3 | 3 | 3 | 3 | 3 | 3 | 3 | 3 | 36 | 3 | 3 | 3 | 3 | 3 | 3 | 3 | 3 |
| W | C | 4 | 2 | 2 | 2 | 3 | 1 | 1 | 1 | 1 | 1 | 4 | 1 | 23 | 3 | 1 | 1 | 1 | 1 | 1 | 1 | 1 |
| W | C | 3 | 2 | 2 | 2 | 2 | 2 | 2 | 2 | 2 | 2 | 2 | 2 | 25 | 1 | 1 | 1 | 1 | 1 | 3 | 1 | 1 |
| W | C | 5 | 1 | 1 | 1 | 1 | 1 | 1 | 1 | 1 | 1 | 1 | 1 | 16 | 1 | 1 | 1 | 1 | 1 | 1 | 1 | 1 |
| M | B | 2 | 1 | 1 | 1 | 1 | 1 | 1 | 1 | 1 | 1 | 1 | 1 | 13 | 1 | 1 | 1 | 1 | 1 | 1 | 2 | 1 |
| M | B | 5 | 4 | 4 | 3 | 4 | 3 | 3 | 3 | 3 | 3 | 4 | 3 | 42 | 1 | 1 | 1 | 1 | 1 | 2 | 1 | 1 |
| M | B | 4 | 1 | 1 | 1 | 1 | 1 | 1 | 1 | 1 | 1 | 1 | 1 | 15 | 1 | 1 | 1 | 1 | 1 | 1 | 1 | 1 |
| M | B | 2 | 2 | 2 | 2 | 2 | 2 | 2 | 2 | 2 | 2 | 4 | 2 | 26 | 1 | 1 | 1 | 1 | 1 | 1 | 1 | 1 |
| M | B | 1 | 2 | 2 | 2 | 1 | 1 | 1 | 1 | 1 | 1 | 1 | 1 | 15 | 1 | 1 | 1 | 1 | 1 | 2 | 1 | 1 |
| M | A | 4 | 4 | 2 | 2 | 3 | 2 | 2 | 2 | 2 | 2 | 7 | 2 | 34 | 5 | 5 | 5 | 1 | 1 | 2 | 1 | 4 |
| M | B | 5 | 5 | 5 | 5 | 5 | 5 | 5 | 5 | 5 | 5 | 4 | 5 | 59 | 2 | 3 | 3 | 4 | 3 | 4 | 3 | 3 |
| M | A | 1 | 1 | 1 | 1 | 1 | 1 | 1 | 1 | 1 | 1 | 7 | 1 | 18 | 1 | 1 | 1 | 1 | 1 | 1 | 1 | 1 |
| M | B | 4 | 2 | 4 | 4 | 1 | 1 | 1 | 1 | 1 | 5 | 1 | 1 | 26 | 4 | 2 | 1 | 1 | 1 | 3 | 2 | 1 |
| M | B | 4 | 7 | 4 | 4 | 1 | 2 | 4 | 4 | 1 | 5 | 7 | 5 | 48 | 5 | 1 | 1 | 1 | 1 | 1 | 3 | 3 |
| W | C | 2 | 2 | 2 | 1 | 1 | 4 | 2 | 2 | 2 | 2 | 2 | 2 | 24 | 1 | 1 | 1 | 1 | 1 | 1 | 1 | 1 |
| M | C | 7 | 7 | 6 | 7 | 7 | 6 | 7 | 7 | 6 | 7 | 4 | 7 | 78 | 4 | 1 | 1 | 1 | 1 | 4 | 4 | 1 |
| M | B | 3 | 2 | 4 | 2 | 2 | 2 | 2 | 2 | 2 | 3 | 3 | 4 | 31 | 4 | 3 | 2 | 1 | 1 | 3 | 2 | 3 |
| M | B | 4 | 3 | 3 | 3 | 1 | 1 | 1 | 1 | 1 | 1 | 1 | 1 | 21 | 0 | 0 | 0 | 0 | 0 | 0 | 0 | 0 |
| M | B | 3 | 3 | 3 | 3 | 4 | 3 | 2 | 4 | 2 | 2 | 4 | 1 | 34 | 1 | 1 | 1 | 1 | 1 | 1 | 1 | 1 |
| M | B | 3 | 4 | 2 | 2 | 3 | 2 | 2 | 2 | 2 | 2 | 6 | 2 | 32 | 2 | 1 | 1 | 1 | 1 | 2 | 1 | 1 |
| M | B | 2 | 2 | 2 | 2 | 2 | 3 | 2 | 2 | 2 | 2 | 2 | 4 | 27 | 4 | 1 | 1 | 1 | 1 | 1 | 1 | 1 |
| M | B | 2 | 2 | 2 | 2 | 1 | 1 | 1 | 1 | 1 | 1 | 1 | 1 | 16 | 1 | 1 | 1 | 1 | 1 | 1 | 1 | 2 |
| M | C | 1 | 1 | 1 | 1 | 1 | 4 | 1 | 1 | 1 | 1 | 1 | 1 | 15 | 1 | 1 | 1 | 1 | 1 | 3 | 1 | 1 |
| W | B | 4 | 4 | 4 | 3 | 2 | 2 | 2 | 3 | 2 | 2 | 2 | 2 | 32 | 5 | 1 | 1 | 1 | 1 | 2 | 1 | 1 |
| M | C | 1 | 1 | 1 | 1 | 1 | 1 | 1 | 1 | 1 | 1 | 1 | 1 | 12 | 0 | 1 | 1 | 2 | 1 | 2 | 1 | 1 |
| M | B | 4 | 4 | 3 | 3 | 4 | 3 | 3 | 3 | 3 | 5 | 5 | 3 | 43 | 3 | 2 | 1 | 1 | 2 | 3 | 2 | 3 |
| M | C | 2 | 3 | 2 | 2 | 4 | 2 | 2 | 3 | 2 | 3 | 5 | 3 | 33 | 2 | 1 | 1 | 2 | 1 | 2 | 2 | 2 |
| M | C | 4 | 5 | 2 | 1 | 3 | 5 | 1 | 1 | 1 | 1 | 5 | 1 | 30 | 3 | 3 | 1 | 1 | 1 | 3 | 1 | 1 |
| M | B | 1 | 2 | 2 | 2 | 2 | 2 | 2 | 2 | 2 | 2 | 2 | 1 | 22 | 5 | 5 | 1 | 1 | 1 | 3 | 1 | 1 |
| W | C | 1 | 1 | 1 | 1 | 1 | 1 | 1 | 1 | 1 | 1 | 1 | 1 | 12 | 1 | 1 | 1 | 1 | 1 | 1 | 1 | 1 |
| W | B | 4 |   | 1 | 1 | 1 | 1 | 1 | 1 | 1 | 1 | 4 | 1 | 17 | 1 | 1 | 1 | 1 | 1 | 2 | 1 | 1 |
| W | B | 4 | 4 | 4 | 4 | 3 | 4 | 2 | 1 | 1 | 1 | 4 | 1 | 33 | 0 | 1 | 1 | 1 | 1 | 2 | 1 | 1 |
| W | C | 2 | 2 | 2 | 2 | 2 | 2 | 2 | 1 | 1 | 1 | 5 | 2 | 24 | 1 | 2 | 1 | 1 | 1 | 3 | 1 | 1 |

|   |   |   |   |   |   |   |   |   |   |   |   |   |   |    |   |   |   |   |   |   |   |   |
|---|---|---|---|---|---|---|---|---|---|---|---|---|---|----|---|---|---|---|---|---|---|---|
| M | B | 5 | 6 | 3 | 4 | 2 | 2 | 4 | 4 | 3 | 4 | 5 | 3 | 45 | 3 | 1 | 1 | 1 | 1 | 1 | 1 | 1 |
| M | C | 6 | 6 | 7 | 7 | 6 | 6 | 6 | 5 | 4 | 6 | 7 | 6 | 72 | 5 | 6 | 4 | 5 | 4 | 6 | 5 | 4 |
| M | C | 2 | 1 | 1 | 1 | 1 | 1 | 1 | 1 | 1 | 1 | 1 | 1 | 13 | 2 | 1 | 1 | 1 | 1 | 1 | 1 | 1 |
| M | B | 1 | 2 | 1 | 1 | 1 | 1 | 3 | 1 | 1 | 1 | 1 | 1 | 15 | 3 | 1 | 1 | 1 | 1 | 1 | 1 | 1 |
| W | C | 1 | 1 | 1 | 1 | 1 | 1 | 1 | 1 | 1 | 1 | 5 | 1 | 16 | 1 | 1 | 1 | 1 | 1 | 1 | 1 | 1 |
| W | B | 4 | 5 | 2 | 0 | 2 | 5 | 2 | 3 | 1 | 4 | 3 | 2 | 33 | 5 | 1 | 1 | 1 | 1 | 3 | 1 | 2 |
| M | B | 6 | 2 | 4 | 3 | 3 | 5 | 5 | 5 | 2 | 1 | 6 | 6 | 48 | 1 | 6 | 5 | 1 | 1 | 5 | 4 | 2 |
| W | A | 2 | 1 | 4 | 3 | 2 | 1 | 2 | 4 | 3 | 1 | 5 | 1 | 29 | 1 | 1 | 1 | 1 | 1 | 3 | 1 | 1 |
| M | B | 4 | 2 | 1 | 2 | 2 | 2 | 3 | 2 | 3 | 4 | 7 | 3 | 35 | 4 | 1 | 1 | 1 | 1 | 1 | 1 | 1 |
| M | B | 2 | 3 | 1 | 1 | 1 | 1 | 1 | 1 | 4 | 1 | 1 | 1 | 18 | 1 | 1 | 1 | 1 | 1 | 3 | 1 | 1 |
| M | C | 3 | 2 | 2 | 3 | 4 | 2 | 1 | 2 | 1 | 2 | 5 | 2 | 29 | 1 | 1 | 1 | 1 | 1 | 1 | 1 | 1 |
| W | B | 5 | 3 | 1 | 3 | 1 | 1 | 4 | 1 | 1 | 1 | 4 | 3 | 28 | 3 | 3 | 1 | 1 | 1 | 1 | 2 | 1 |
| M | B | 3 | 3 | 3 | 2 | 2 | 1 | 1 | 4 | 1 | 2 | 2 | 2 | 26 | 4 | 4 | 4 | 2 | 2 | 3 | 2 | 3 |
| M | A | 4 | 2 | 3 | 3 | 2 | 4 | 5 | 3 | 1 | 2 | 4 | 4 | 37 | 2 | 1 | 1 | 1 | 2 | 3 | 2 | 1 |
| M | B | 6 | 2 | 1 | 5 | 3 | 2 | 5 | 2 | 2 | 1 | 5 | 2 | 36 | 2 | 1 | 1 | 1 | 1 | 3 | 2 | 3 |
| M | B | 2 | 1 | 1 | 1 | 1 | 1 | 1 | 1 | 1 | 1 | 5 | 1 | 17 | 6 | 2 | 1 | 1 | 1 | 1 | 1 | 1 |
| W | B | 3 | 1 | 1 | 1 | 1 | 1 | 1 | 2 | 1 | 1 | 1 | 2 | 16 | 1 | 1 | 1 | 1 | 1 | 1 | 1 | 1 |
| M | A | 4 | 3 | 3 | 3 | 4 | 4 | 3 | 3 | 3 | 3 | 6 | 3 | 42 | 5 | 1 | 1 | 1 | 1 | 2 | 1 | 1 |
| M | B | 4 | 4 | 4 | 4 | 4 | 4 | 4 | 4 | 4 | 4 | 4 | 4 | 48 | 3 | 4 | 3 | 4 | 4 | 3 | 3 | 4 |
| M | B | 4 | 5 | 2 | 4 | 6 | 2 | 3 | 4 | 2 | 3 | 5 | 3 | 43 | 6 | 1 | 1 | 1 | 1 | 2 | 3 | 5 |
| M | B | 2 | 3 | 4 | 2 | 5 | 2 | 3 | 4 | 4 | 2 | 5 | 3 | 39 | 4 | 2 | 1 | 1 | 1 | 3 | 1 | 1 |
| M | B | 5 | 4 | 5 | 3 | 4 | 3 | 3 | 4 | 2 | 3 | 6 | 4 | 46 | 5 | 1 | 2 | 1 | 1 | 3 | 1 | 2 |
| W | B | 1 | 2 | 1 | 1 | 2 | 2 | 1 | 1 | 1 | 1 | 4 | 2 | 19 | 1 | 1 | 1 | 1 | 1 | 1 | 1 | 1 |
| M | C | 4 | 4 | 4 | 4 | 1 | 2 | 4 | 2 | 4 | 4 | 6 | 4 | 43 | 3 | 1 | 1 | 1 | 1 | 4 | 4 | 4 |
| M | C | 3 | 2 | 2 | 1 | 1 | 2 | 2 | 2 | 1 | 1 | 2 | 1 | 20 | 2 | 1 | 2 | 1 | 1 | 1 | 1 | 1 |
| M | B | 2 | 2 | 2 | 2 | 2 | 2 | 2 | 2 | 2 | 2 | 4 | 2 | 26 | 4 | 1 | 1 | 1 | 1 | 1 | 2 | 3 |
| W | A | 1 | 1 | 1 | 1 | 1 | 1 | 1 | 1 | 1 | 1 | 1 | 1 | 12 | 1 | 1 | 1 | 1 | 1 | 1 | 1 | 1 |
| M | B | 2 | 1 | 1 | 1 | 2 | 1 | 1 | 1 | 1 | 1 | 1 | 1 | 14 | 1 | 1 | 1 | 1 | 1 | 1 | 1 | 1 |
| M | C | 2 | 1 | 1 | 1 | 2 | 1 | 1 | 1 | 1 | 1 | 1 | 2 | 15 | 1 | 1 | 1 | 1 | 1 | 1 | 1 | 1 |
| M | B | 6 | 6 | 6 | 6 | 4 | 2 | 2 | 2 | 2 | 2 | 2 | 2 | 42 | 1 | 1 | 1 | 1 | 1 | 1 | 1 | 2 |
| M | A | 7 | 1 | 2 | 1 | 1 | 1 | 1 | 1 | 1 | 4 | 7 | 1 | 28 | 1 | 1 | 1 | 1 | 1 | 1 | 1 | 1 |
| M | B | 3 | 6 | 5 | 4 | 6 | 3 | 4 | 4 | 3 | 3 | 5 | 3 | 49 | 5 | 2 | 2 | 3 | 1 | 2 | 1 | 3 |
| M | C | 2 | 7 | 2 | 4 | 3 | 1 | 1 | 2 | 1 | 4 | 6 | 2 | 35 | 3 | 1 | 1 | 2 | 1 | 2 | 1 | 2 |
| W | C | 1 | 1 | 1 | 1 | 1 | 1 | 1 | 1 | 1 | 1 | 1 | 1 | 12 | 1 | 1 | 1 | 1 | 1 | 1 | 1 | 1 |
| M | C | 2 | 2 | 2 | 2 | 4 | 2 | 2 | 2 | 2 | 4 | 4 | 2 | 30 | 3 | 2 | 1 | 1 | 1 | 2 | 1 | 1 |
| M | A | 2 | 3 | 2 | 1 | 3 | 2 | 2 | 2 | 1 | 2 | 5 | 2 | 27 | 4 | 2 | 1 | 1 | 1 | 3 | 1 | 2 |
| W | A | 4 | 4 | 4 | 4 | 3 | 3 | 3 | 4 | 3 | 3 | 3 | 3 | 41 | 4 | 1 | 1 | 1 | 1 | 3 | 1 | 1 |
| M | B | 7 | 1 | 1 | 6 | 2 | 2 | 2 | 1 | 1 | 5 | 6 | 1 | 35 | 2 | 4 | 4 | 1 | 1 | 2 | 1 | 1 |
| W | C | 2 | 5 | 3 | 4 | 2 | 2 | 4 | 2 | 1 | 2 | 4 | 2 | 33 | 3 | 1 | 1 | 4 | 1 | 3 | 1 | 2 |

|   |   |   |   |   |   |   |   |   |   |   |   |   |    |    |   |   |   |   |   |   |   |   |
|---|---|---|---|---|---|---|---|---|---|---|---|---|----|----|---|---|---|---|---|---|---|---|
| M | B | 2 | 2 | 2 | 1 | 1 | 2 | 1 | 1 | 1 | 1 | 1 | 16 | 1  | 1 | 1 | 1 | 1 | 1 | 1 |   |   |
| M | B | 6 | 4 | 3 | 4 | 5 | 4 | 4 | 4 | 3 | 4 | 5 | 3  | 49 | 2 | 2 | 2 | 2 | 2 | 1 | 1 |   |
| M | B | 3 | 4 | 1 | 1 | 1 | 1 | 5 | 1 | 1 | 5 | 4 | 1  | 28 | 2 | 1 | 1 | 1 | 1 | 3 | 6 |   |
| M | A | 2 | 1 | 2 | 1 | 3 | 4 | 2 | 2 | 2 | 1 | 5 | 1  | 26 | 1 | 1 | 1 | 2 | 1 | 1 | 1 |   |
| W | B | 3 | 4 | 2 | 2 | 2 | 2 | 2 | 2 | 2 | 2 | 2 | 2  | 27 | 2 | 1 | 1 | 1 | 1 | 4 | 2 | 2 |
| W | B | 1 | 1 | 1 | 2 | 1 | 2 | 1 | 1 | 1 | 2 | 4 | 1  | 18 | 5 | 1 | 1 | 1 | 1 | 1 | 1 | 1 |
| M | C | 3 | 1 | 1 | 1 | 1 | 2 | 1 | 1 | 1 | 1 | 4 | 1  | 18 | 1 | 1 | 1 | 1 | 1 | 1 | 1 | 1 |
| W | A | 3 | 2 | 1 | 1 | 1 | 1 | 1 | 1 | 1 | 1 | 1 | 1  | 15 | 1 | 1 | 1 | 1 | 1 | 1 | 1 | 1 |
| M | C | 6 | 4 | 4 | 4 | 4 | 4 | 4 | 4 | 3 | 3 | 4 | 3  | 47 | 5 | 1 | 1 | 1 | 1 | 1 | 1 | 1 |
| M | C | 5 | 4 | 4 | 4 | 4 | 2 | 3 | 4 | 2 | 1 | 1 | 2  | 36 | 4 | 1 | 2 | 3 | 2 | 3 | 1 | 2 |
| M | B | 2 | 2 | 1 | 2 | 3 | 2 | 2 | 2 | 2 | 1 | 2 | 2  | 23 | 3 | 2 | 1 | 1 | 2 | 2 | 1 | 3 |
| M | B | 2 | 2 | 1 | 1 | 1 | 1 | 1 | 1 | 1 | 1 | 1 | 1  | 14 | 1 | 1 | 1 | 1 | 1 | 1 | 1 | 1 |
| W | B | 5 | 5 | 5 | 4 | 3 | 3 | 4 | 4 | 4 | 4 | 6 | 6  | 53 | 1 | 1 | 1 | 1 | 1 | 1 | 1 | 2 |
| W | B | 2 | 2 | 2 | 2 | 2 | 2 | 2 | 2 | 2 | 2 | 2 | 2  | 24 | 1 | 1 | 1 | 1 | 1 | 1 | 1 | 1 |
| W | A | 2 | 2 | 2 | 2 | 2 | 2 | 2 | 2 | 2 | 2 | 2 | 2  | 24 | 1 | 1 | 1 | 1 | 1 | 1 | 2 | 1 |
| M | A | 4 | 1 | 1 | 1 | 1 | 1 | 1 | 1 | 1 | 1 | 1 | 1  | 15 | 1 | 1 | 1 | 1 | 1 | 1 | 1 | 1 |
| M | B | 3 | 4 | 4 | 4 | 2 | 2 | 3 | 2 | 2 | 2 | 4 | 4  | 36 | 2 | 1 | 1 | 1 | 1 | 1 | 1 | 1 |
| W | A | 4 | 4 | 4 | 3 | 4 | 4 | 4 | 4 | 4 | 4 | 3 | 4  | 46 | 4 | 3 | 4 | 3 | 4 | 4 | 4 | 4 |
| W | B | 5 | 2 | 2 | 2 | 2 | 1 | 1 | 2 | 1 | 1 | 1 | 2  | 22 | 2 | 1 | 1 | 1 | 1 | 1 | 4 | 3 |
| W | B | 2 | 4 | 2 | 4 | 2 | 1 | 1 | 2 | 2 | 2 | 2 | 2  | 26 | 1 | 1 | 1 | 1 | 1 | 1 | 1 | 1 |
| W | C | 1 | 1 | 1 | 1 | 1 | 1 | 1 | 1 | 1 | 1 | 1 | 1  | 12 | 1 | 1 | 1 | 1 | 1 | 1 | 1 | 1 |
| W | B | 2 | 2 | 2 | 2 | 2 | 2 | 2 | 2 | 2 | 4 | 1 | 1  | 25 | 2 | 1 | 1 | 1 | 1 | 2 | 1 | 1 |
| W | B | 2 | 2 | 2 | 2 | 1 | 1 | 1 | 1 | 1 | 1 | 3 | 1  | 18 | 1 | 1 | 1 | 1 | 1 | 1 | 1 | 1 |
| W | B | 3 | 2 | 2 | 2 | 1 | 1 | 1 | 1 | 1 | 1 | 2 | 1  | 18 | 2 | 3 | 3 | 2 | 1 | 3 | 1 | 1 |
| M | C | 4 | 5 | 5 | 5 | 3 | 3 | 1 | 1 | 1 | 1 | 5 | 1  | 35 | 5 | 1 | 1 | 2 | 1 | 1 | 1 | 1 |
| W | B | 4 | 4 | 3 | 4 | 2 | 1 | 1 | 2 | 1 | 2 | 6 | 1  | 31 | 1 | 1 | 2 | 1 | 1 | 2 | 1 | 1 |
| W | C | 1 | 1 | 1 | 1 | 1 | 1 | 1 | 1 | 1 | 1 | 1 | 1  | 12 | 5 | 1 | 1 | 3 | 1 | 4 | 2 | 1 |
| W | B | 3 | 4 | 2 | 3 | 1 | 1 | 1 | 1 | 1 | 1 | 4 | 1  | 23 | 1 | 1 | 1 | 1 | 1 | 1 | 1 | 1 |
| W | C | 5 | 4 | 3 | 5 | 3 | 3 | 4 | 4 | 5 | 5 | 4 | 5  | 50 | 3 | 4 | 3 | 4 | 3 | 4 | 3 | 4 |
| M | C | 3 | 1 | 1 | 1 | 1 | 1 | 1 | 1 | 1 | 1 | 1 | 1  | 14 | 1 | 1 | 1 | 1 | 1 | 1 | 1 | 1 |
| M | C | 2 | 1 | 1 | 1 | 1 | 1 | 1 | 1 | 1 | 1 | 2 | 1  | 14 | 2 | 1 | 1 | 1 | 1 | 1 | 1 | 1 |
| M | C | 2 | 1 | 1 | 1 | 1 | 1 | 1 | 1 | 1 | 1 | 1 | 1  | 13 | 2 | 1 | 3 | 1 | 1 | 1 | 1 | 2 |
| M | C | 2 | 2 | 2 | 1 | 1 | 1 | 1 | 1 | 1 | 3 | 6 | 1  | 22 | 4 | 3 | 1 | 1 | 1 | 3 | 1 | 1 |
| W | C | 1 | 1 | 1 | 1 | 1 | 1 | 1 | 1 | 1 | 1 | 1 | 1  | 12 | 1 | 1 | 1 | 1 | 1 | 1 | 1 | 1 |
| W | B | 2 | 2 | 1 | 1 | 1 | 1 | 1 | 1 | 1 | 1 | 1 | 1  | 14 | 1 | 1 | 1 | 1 | 1 | 3 | 1 | 1 |
| W | B | 5 | 2 | 2 | 2 | 2 | 1 | 1 | 1 | 1 | 3 | 5 | 1  | 26 | 1 | 1 | 1 | 1 | 1 | 2 | 3 | 1 |
| M | C | 1 | 1 | 1 | 1 | 1 | 1 | 1 | 1 | 1 | 1 | 1 | 1  | 12 | 1 | 1 | 1 | 1 | 1 | 1 | 1 | 1 |
| W | B | 1 | 4 | 1 | 1 | 1 | 1 | 1 | 1 | 1 | 1 | 1 | 1  | 15 | 1 | 1 | 1 | 1 | 1 | 1 | 1 | 1 |
| M | C | 4 | 2 | 3 | 2 | 2 | 1 | 1 | 1 | 1 | 1 | 1 | 1  | 20 | 1 | 1 | 1 | 1 | 1 | 3 | 1 | 1 |

|   |   |   |   |   |   |   |   |   |   |   |   |   |   |    |   |   |   |   |   |   |   |   |
|---|---|---|---|---|---|---|---|---|---|---|---|---|---|----|---|---|---|---|---|---|---|---|
| M | C | 3 | 1 | 1 | 1 | 2 | 2 | 3 | 1 | 1 | 1 | 1 | 1 | 18 | 5 | 1 | 1 | 1 | 1 | 2 | 1 | 1 |
| M | A | 1 | 1 | 1 | 1 | 1 | 1 | 1 | 1 | 1 | 1 | 4 | 1 | 15 | 1 | 1 | 1 | 1 | 1 | 1 | 1 | 1 |
| M | A | 4 | 2 | 1 | 1 | 1 | 1 | 1 | 1 | 1 | 1 | 1 | 1 | 16 | 1 | 1 | 1 | 1 | 1 | 1 | 1 | 1 |
| M | B | 1 | 1 | 1 | 1 | 1 | 1 | 1 | 1 | 1 | 1 | 1 | 1 | 12 | 2 | 1 | 1 | 1 | 1 | 1 | 1 | 1 |
| M | A | 4 | 4 | 2 | 1 | 1 | 1 | 1 | 1 | 1 | 1 | 1 | 1 | 19 | 1 | 1 | 1 | 1 | 1 | 1 | 1 | 1 |
| M | A | 5 | 4 | 2 | 2 | 2 | 3 | 2 | 2 | 2 | 2 | 2 | 2 | 30 | 2 | 3 | 2 | 1 | 1 | 2 | 1 | 2 |
| M | A | 1 | 1 | 1 | 1 | 1 | 1 | 1 | 1 | 1 | 1 | 1 | 1 | 12 | 1 | 1 | 1 | 1 | 1 | 1 | 1 | 1 |
| W | A | 4 | 3 | 3 | 3 | 4 | 2 | 3 | 2 | 2 | 2 | 3 | 2 | 33 | 2 | 2 | 1 | 1 | 1 | 2 | 2 | 2 |
| W | A | 1 | 2 | 1 | 1 | 1 | 1 | 1 | 1 | 1 | 1 | 1 | 1 | 13 | 1 | 1 | 1 | 1 | 1 | 1 | 1 | 1 |

| Gender | Age | Sex_impulse1 | Sex_impulse2 | Sex_impulse3 | Sex_impulse4 | Sex_impulse5 | Sex_impulse6 | Sex_impulse7 | Sex_impulse8 | Sex_impulse9 | Sex_impulse10 | Sex_impulse_SUM |
|--------|-----|--------------|--------------|--------------|--------------|--------------|--------------|--------------|--------------|--------------|---------------|-----------------|
| M      | C   | 3            | 1            | 1            | 1            | 1            | 3            | 4            | 3            | 3            | 3             | 23              |
| M      | C   | 2            | 2            | 1            | 1            | 1            | 2            | 1            | 2            | 3            | 2             | 17              |
| M      | A   | 1            | 1            | 1            | 3            | 1            | 3            | 2            | 2            | 3            | 1             | 18              |
| M      | C   | 1            | 3            | 1            | 1            | 1            | 4            | 1            | 1            | 4            | 1             | 18              |
| M      | A   | 3            | 1            | 1            | 3            | 1            | 1            | 2            | 1            | 3            | 1             | 17              |
| M      | B   | 2            | 1            | 1            | 1            | 1            | 4            | 1            | 4            | 4            | 1             | 20              |
| W      | A   | 3            | 3            | 1            | 1            | 1            | 1            | 2            | 1            | 4            | 1             | 18              |
| M      | B   | 1            | 1            | 1            | 1            | 1            | 1            | 1            | 1            | 1            | 1             | 10              |
| M      | C   | 3            | 3            | 2            | 1            | 1            | 2            | 3            | 2            | 3            | 2             | 22              |
| M      | B   | 1            | 1            | 1            | 1            | 1            | 1            | 1            | 1            | 4            | 1             | 13              |
| W      | B   | 3            | 3            | 1            | 2            | 1            | 2            | 2            | 2            | 3            | 1             | 20              |
| W      | A   | 2            | 1            | 1            | 1            | 1            | 3            | 1            | 3            | 3            | 1             | 17              |
| W      | A   | 1            | 1            | 1            | 1            | 1            | 3            | 1            | 3            | 3            | 1             | 16              |
| W      | A   | 1            | 1            | 1            | 1            | 1            | 1            | 1            | 1            | 1            | 1             | 10              |
| W      | C   | 2            | 1            | 1            | 2            | 0            | 0            | 3            | 1            | 3            | 1             | 14              |
| W      | C   | 1            | 3            | 1            | 1            | 1            | 1            | 1            | 1            | 3            | 1             | 14              |
| M      | A   | 3            | 1            | 3            | 1            | 1            | 1            | 1            | 1            | 3            | 1             | 16              |
| M      | C   | 2            | 2            | 1            | 1            | 1            | 2            | 2            | 3            | 4            | 1             | 19              |
| W      | B   | 1            | 3            | 1            | 1            | 1            | 1            | 3            | 1            | 3            | 1             | 16              |
| W      | A   | 2            | 1            | 1            | 1            | 1            | 3            | 2            | 3            | 1            | 1             | 16              |
| W      | A   | 1            | 1            | 1            | 1            | 1            | 1            | 1            | 1            | 3            | 1             | 12              |
| M      | A   | 3            | 2            | 3            | 3            | 1            | 3            | 3            | 3            | 3            | 1             | 25              |

|   |   |   |   |   |   |   |   |   |   |   |   |    |
|---|---|---|---|---|---|---|---|---|---|---|---|----|
| W | B | 0 | 0 | 0 | 0 | 0 | 0 | 0 | 0 | 0 | 0 | 0  |
| W | A | 2 | 2 | 2 | 3 | 2 | 2 | 2 | 2 | 2 | 2 | 21 |
| W | A | 0 | 0 | 0 | 0 | 0 | 0 | 0 | 0 | 0 | 0 | 0  |
| M | A | 0 | 0 | 0 | 0 | 0 | 0 | 0 | 0 | 0 | 0 | 0  |
| M | C | 2 | 1 | 1 | 3 | 1 | 1 | 3 | 1 | 1 | 1 | 15 |
| M | C | 2 | 1 | 3 | 1 | 1 | 1 | 2 | 1 | 2 | 1 | 15 |
| M | C | 1 | 4 | 2 | 3 | 2 | 3 | 1 | 3 | 4 | 1 | 24 |
| W | A | 1 | 3 | 2 | 3 | 1 | 3 | 3 | 1 | 2 | 1 | 20 |
| W | B | 0 | 0 | 0 | 0 | 0 | 0 | 0 | 0 | 0 | 0 | 0  |
| W | B | 2 | 2 | 3 | 4 | 1 | 1 | 3 | 1 | 3 | 1 | 21 |
| W | B | 2 | 3 | 3 | 2 | 1 | 2 | 1 | 2 | 4 | 1 | 21 |
| W | B | 1 | 1 | 1 | 3 | 1 | 2 | 3 | 1 | 2 | 1 | 16 |
| W | C | 1 | 1 | 3 | 3 | 1 | 2 | 3 | 2 | 4 | 2 | 22 |
| M | C | 2 | 2 | 1 | 3 | 1 | 2 | 1 | 2 | 3 | 1 | 18 |
| M | B | 1 | 3 | 1 | 1 | 1 | 3 | 1 | 2 | 3 | 1 | 17 |
| M | B | 3 | 1 | 1 | 3 | 1 | 1 | 3 | 1 | 3 | 1 | 18 |
| W | B | 2 | 1 | 1 | 3 | 1 | 3 | 1 | 1 | 4 | 1 | 18 |
| W | C | 1 | 1 | 1 | 1 | 1 | 1 | 1 | 1 | 1 | 1 | 10 |
| W | C | 2 | 1 | 1 | 1 | 1 | 1 | 3 | 1 | 3 | 1 | 15 |
| M | A | 3 | 2 | 2 | 2 | 1 | 3 | 2 | 3 | 3 | 1 | 22 |
| W | A | 1 | 1 | 1 | 1 | 1 | 1 | 1 | 1 | 1 | 1 | 10 |
| M | C | 1 | 1 | 3 | 4 | 2 | 3 | 3 | 4 | 4 | 1 | 26 |
| M | A | 2 | 1 | 2 | 3 | 2 | 2 | 2 | 2 | 3 | 1 | 20 |
| M | A | 3 | 2 | 1 | 1 | 1 | 4 | 1 | 3 | 3 | 1 | 20 |
| M | A | 2 | 3 | 3 | 1 | 1 | 3 | 1 | 2 | 3 | 1 | 20 |
| M | A | 0 | 0 | 0 | 0 | 0 | 0 | 0 | 0 | 0 | 0 | 0  |
| W | C | 1 | 2 | 1 | 1 | 1 | 1 | 1 | 1 | 1 | 1 | 11 |
| W | C | 3 | 2 | 1 | 3 | 1 | 3 | 3 | 3 | 3 | 2 | 24 |
| W | C | 2 | 2 | 1 | 1 | 1 | 1 | 3 | 1 | 3 | 1 | 16 |
| W | A | 1 | 1 | 1 | 1 | 1 | 3 | 1 | 3 | 2 | 1 | 15 |
| M | A | 2 | 2 | 2 | 3 | 2 | 3 | 2 | 3 | 3 | 2 | 24 |
| M | C | 3 | 2 | 1 | 2 | 1 | 2 | 2 | 3 | 4 | 1 | 21 |
| M | C | 4 |   | 1 | 1 | 1 | 1 | 3 | 3 | 3 | 2 | 19 |
| M | C | 3 | 3 | 3 | 1 | 1 | 2 | 3 | 3 | 4 | 3 | 26 |
| W | C | 1 | 2 | 1 | 1 | 1 | 1 | 1 | 1 | 2 | 1 | 12 |
| W | C | 1 | 1 | 3 | 1 | 1 | 1 | 1 | 1 | 3 | 1 | 14 |
| W | C | 1 | 1 | 1 | 1 | 1 | 3 | 3 | 1 | 3 | 1 | 16 |
| W | B | 1 | 1 | 2 | 3 | 1 | 2 | 3 | 1 | 1 | 1 | 16 |
| W | B | 2 | 3 | 1 | 3 | 1 | 2 | 1 | 2 | 2 | 1 | 18 |

|   |   |   |   |   |   |   |   |   |   |   |   |    |
|---|---|---|---|---|---|---|---|---|---|---|---|----|
| W | A | 1 | 1 | 1 | 1 | 1 | 1 | 1 | 1 | 1 | 1 | 10 |
| M | B | 1 | 3 | 1 | 1 | 1 | 2 | 2 | 2 | 2 | 1 | 16 |
| M | A | 2 | 2 | 1 | 1 | 1 | 1 | 1 | 3 | 3 | 1 | 16 |
| W | B | 1 | 1 | 1 | 3 | 1 | 2 | 3 | 2 | 0 | 2 | 16 |
| M | C | 2 | 3 | 2 | 1 | 1 | 1 | 2 | 2 | 3 | 1 | 18 |
| W | B | 2 | 2 | 2 | 2 | 2 | 2 | 2 | 3 | 2 | 2 | 21 |
| M | C | 1 | 4 | 2 | 2 | 1 | 2 | 3 | 3 | 3 | 1 | 22 |
| M | A | 1 | 1 | 1 | 1 | 1 | 3 | 1 | 3 | 4 | 1 | 17 |
| M | A | 3 | 1 | 2 | 1 | 1 | 1 | 1 | 2 | 3 | 1 | 16 |
| M | A | 1 | 1 | 1 | 1 | 1 | 1 | 1 | 1 | 1 | 1 | 10 |
| W | C | 1 | 1 | 1 | 1 | 1 | 3 | 1 | 3 | 4 | 1 | 17 |
| M | C | 1 | 1 | 2 | 1 | 1 | 1 | 1 | 1 | 1 | 1 | 11 |
| M | C | 2 | 1 | 1 | 3 | 1 | 1 | 3 | 1 | 1 | 1 | 15 |
| W | A | 1 | 3 | 1 | 1 | 1 | 1 | 1 | 2 | 3 | 1 | 15 |
| W | C | 4 | 3 | 3 | 3 | 3 | 3 | 3 | 3 | 3 | 3 | 31 |
| M | C | 0 | 0 | 0 | 0 | 0 | 0 | 0 | 0 | 0 | 0 | 0  |
| M | C | 4 | 1 | 1 | 4 | 1 | 1 | 4 | 1 | 4 | 1 | 22 |
| W | B | 1 | 3 | 3 | 2 | 1 | 1 | 1 | 1 | 4 | 1 | 18 |
| M | C | 3 | 3 | 2 | 2 | 2 | 2 | 3 | 2 | 2 | 3 | 24 |
| M | B | 2 | 1 | 1 | 1 | 1 | 4 | 1 | 1 | 1 | 1 | 14 |
| M | C | 3 | 2 | 1 | 1 | 1 | 1 | 2 | 1 | 3 | 2 | 17 |
| W | C | 3 | 3 | 2 | 1 | 1 | 2 | 1 | 2 | 2 | 1 | 18 |
| M | C | 3 | 3 | 2 | 3 | 1 | 3 | 3 | 3 | 3 | 1 | 25 |
| M | C | 1 | 3 | 1 | 1 | 1 | 1 | 4 | 1 | 4 | 1 | 18 |
| W | A | 1 | 2 | 1 | 1 | 1 | 3 | 1 | 3 | 2 | 1 | 16 |
| W | C | 1 | 2 | 3 | 1 | 1 | 1 | 4 | 1 | 1 | 2 | 17 |
| W | A | 2 | 2 | 2 | 3 | 1 | 3 | 2 | 2 | 3 | 1 | 21 |
| M | C | 3 | 1 | 1 | 1 | 1 | 2 | 2 | 2 | 4 | 1 | 18 |
| M | C | 2 | 1 | 2 | 3 | 1 | 3 | 2 | 3 | 2 | 1 | 20 |
| M | C | 1 | 1 | 1 | 1 | 1 | 3 | 2 | 3 | 2 | 1 | 16 |
| M | C | 1 | 1 | 3 | 3 | 1 | 2 | 2 | 1 | 3 | 1 | 18 |
| W | A | 1 | 1 | 1 | 1 | 1 | 3 | 3 | 1 | 2 | 2 | 16 |
| W | C | 2 | 2 | 3 | 1 | 1 | 2 | 2 | 2 | 2 | 1 | 18 |
| M | A | 1 | 1 | 1 | 1 | 1 | 1 | 1 | 1 | 1 | 1 | 10 |
| M | C | 3 | 2 | 2 | 2 | 2 | 3 | 2 | 3 | 3 | 2 | 24 |
| M | C | 3 | 1 | 2 | 2 | 1 | 3 | 2 | 3 | 3 | 1 | 21 |
| W | B | 2 | 2 | 2 | 2 | 1 | 4 | 2 | 3 | 3 | 1 | 22 |
| W | A | 1 | 1 | 1 | 1 | 1 | 1 | 1 | 1 | 1 | 1 | 10 |
| M | C | 1 | 2 | 1 | 1 | 1 | 3 | 2 | 2 | 4 | 1 | 18 |

|   |   |   |   |   |   |   |   |   |   |   |   |    |
|---|---|---|---|---|---|---|---|---|---|---|---|----|
| M | C | 1 | 2 | 1 | 1 | 1 | 2 | 3 | 2 | 4 | 1 | 18 |
| M | A | 2 | 1 | 1 | 1 | 1 | 1 | 1 | 1 | 2 | 1 | 12 |
| W | C | 2 | 2 | 2 | 2 | 1 | 1 | 1 | 1 | 3 | 1 | 16 |
| M | A | 3 | 1 | 1 | 1 | 1 | 3 | 1 | 3 | 4 | 1 | 19 |
| M | C | 1 | 3 | 2 | 1 | 2 | 3 | 2 | 2 | 2 | 2 | 20 |
| M | C | 4 | 3 | 2 | 2 | 1 | 2 | 2 | 2 | 4 | 2 | 24 |
| M | C | 3 | 3 | 3 | 3 | 3 | 3 | 3 | 3 | 3 | 3 | 30 |
| W | C | 2 | 2 | 2 | 2 | 2 | 3 | 3 | 2 | 3 | 2 | 23 |
| W | C | 2 | 1 | 2 | 2 | 2 | 3 | 3 | 3 | 4 | 1 | 23 |
| W | C | 2 | 3 | 2 | 2 | 2 | 2 | 3 | 2 | 2 | 2 | 22 |
| M | B | 2 | 2 | 2 | 1 | 1 | 1 | 1 | 1 | 1 | 1 | 13 |
| M | B | 3 | 3 | 3 | 4 | 2 | 2 | 2 | 2 | 2 | 2 | 25 |
| M | B | 2 | 2 | 2 | 1 | 1 | 2 | 2 | 2 | 3 | 1 | 18 |
| M | B | 3 | 2 | 2 | 3 | 1 | 3 | 3 | 3 | 3 | 2 | 25 |
| M | B | 2 | 1 | 1 | 1 | 1 | 1 | 1 | 3 | 3 | 1 | 15 |
| M | A | 2 | 2 | 3 | 4 | 1 | 3 | 1 | 3 | 3 | 3 | 25 |
| M | B | 3 | 2 | 2 | 1 | 2 | 2 | 2 | 2 | 2 | 2 | 20 |
| M | A | 4 | 3 | 1 | 3 | 1 | 3 | 3 | 3 | 3 | 1 | 25 |
| M | B | 1 | 3 | 1 | 3 | 1 | 2 | 1 | 1 | 3 | 1 | 17 |
| M | B | 3 | 3 | 1 | 1 | 1 | 1 | 1 | 1 | 3 | 3 | 18 |
| W | C | 2 | 2 | 2 | 4 | 1 | 3 | 2 | 2 | 4 | 1 | 23 |
| M | C | 4 | 4 | 4 | 4 | 1 | 1 | 3 | 1 | 2 | 3 | 27 |
| M | B | 1 | 1 | 2 | 1 | 1 | 3 | 1 | 2 | 1 | 1 | 14 |
| M | B | 0 | 0 | 0 | 0 | 0 | 0 | 0 | 0 | 0 | 0 | 0  |
| M | B | 2 | 3 | 3 | 3 | 2 | 2 | 3 | 1 | 2 | 3 | 24 |
| M | B | 2 | 2 | 3 | 1 | 1 | 1 | 1 | 2 | 2 | 2 | 17 |
| M | B | 3 | 1 | 1 | 1 | 1 | 2 | 3 | 3 | 3 | 1 | 19 |
| M | B | 2 | 3 | 1 | 1 | 1 | 2 | 3 | 2 | 3 | 1 | 19 |
| M | C | 2 | 1 | 2 | 3 | 1 | 2 | 3 | 3 | 3 | 1 | 21 |
| W | B | 1 | 3 | 1 | 1 | 1 | 2 | 1 | 1 | 3 | 1 | 15 |
| M | C | 3 | 2 | 1 | 2 | 1 | 2 | 1 | 3 | 3 | 1 | 19 |
| M | B | 3 | 3 | 2 | 3 | 1 | 2 | 2 | 2 | 3 | 1 | 22 |
| M | C | 3 | 1 | 2 | 3 | 1 | 1 | 2 | 1 | 2 | 2 | 18 |
| M | C | 3 | 4 | 1 | 1 | 1 | 1 | 3 | 1 | 3 | 4 | 22 |
| M | B | 3 | 3 | 3 | 2 | 1 | 1 | 1 | 2 | 3 | 2 | 21 |
| W | C | 1 | 1 | 1 | 1 | 1 | 3 | 3 | 1 | 3 | 1 | 16 |
| W | B | 3 | 2 | 1 | 1 | 1 | 4 | 1 | 3 | 2 | 1 | 19 |
| W | B | 1 | 1 | 1 | 1 | 1 | 1 | 1 | 1 | 1 | 1 | 10 |
| W | C | 2 | 1 | 1 | 1 | 1 | 2 | 1 | 2 | 3 | 2 | 16 |



|   |   |   |   |   |   |   |   |   |   |   |   |    |
|---|---|---|---|---|---|---|---|---|---|---|---|----|
| M | B | 3 | 4 | 2 | 3 | 1 | 1 | 1 | 2 | 3 | 1 | 21 |
| M | C | 3 | 4 | 3 | 4 | 1 | 3 | 3 | 1 | 4 | 2 | 28 |
| M | C | 3 | 3 | 1 | 2 | 1 | 3 | 3 | 2 | 3 | 2 | 23 |
| M | B | 2 | 3 | 3 | 3 | 1 | 2 | 3 | 3 | 2 | 1 | 23 |
| W | C | 1 | 3 | 1 | 1 | 1 | 3 | 3 | 3 | 3 | 1 | 20 |
| W | B | 3 | 2 | 2 | 1 | 1 | 2 | 3 | 1 | 3 | 1 | 19 |
| M | B | 2 | 4 | 3 | 1 | 1 | 1 | 2 | 1 | 3 | 1 | 19 |
| W | A | 2 | 2 | 1 | 3 | 1 | 1 | 3 | 3 | 3 | 2 | 21 |
| M | B | 3 | 1 | 3 | 1 | 1 | 4 | 1 | 2 | 3 | 1 | 20 |
| M | B | 3 | 3 | 1 | 1 | 1 | 2 | 3 | 1 | 3 | 1 | 19 |
| M | C | 1 | 2 | 1 | 1 | 1 | 3 | 2 | 4 | 3 | 1 | 19 |
| W | B | 1 | 3 | 1 | 1 | 2 | 4 | 1 | 4 | 4 | 1 | 22 |
| M | B | 2 | 2 | 1 | 1 | 1 | 2 | 1 | 3 | 3 | 2 | 18 |
| M | A | 3 | 3 | 2 | 1 | 2 | 4 | 2 | 3 | 4 | 1 | 25 |
| M | B | 3 | 4 | 3 | 3 | 1 | 2 | 1 | 3 | 3 | 3 | 26 |
| M | B | 1 | 3 | 1 | 1 | 1 | 1 | 1 | 3 | 4 | 1 | 17 |
| W | B | 1 | 1 | 2 | 2 | 1 | 2 | 4 | 3 | 3 | 1 | 20 |
| M | A | 1 | 3 | 4 | 1 | 1 | 2 | 3 | 2 | 3 | 2 | 22 |
| M | B | 3 | 2 | 3 | 3 | 3 | 2 | 2 | 3 | 2 | 3 | 26 |
| M | B | 1 | 4 | 3 | 3 | 1 | 2 | 4 | 1 | 4 | 2 | 25 |
| M | B | 1 | 2 | 4 | 3 | 1 | 2 | 2 | 2 | 3 | 3 | 23 |
| M | B | 1 | 1 | 1 | 1 | 1 | 3 | 3 | 1 | 2 | 1 | 15 |
| W | B | 3 | 1 | 3 | 3 | 1 | 3 | 2 | 3 | 4 | 1 | 24 |
| M | C | 4 | 4 | 4 | 4 | 1 | 1 | 4 | 1 | 3 | 2 | 28 |
| M | C | 3 | 2 | 2 | 3 | 3 | 4 | 1 | 3 | 3 | 1 | 25 |
| M | B | 2 | 3 | 1 | 1 | 1 | 2 | 3 | 1 | 3 | 1 | 18 |
| W | A | 2 | 2 | 2 | 1 | 1 | 3 | 1 | 3 | 4 | 1 | 20 |
| M | B | 2 | 1 | 1 | 1 | 1 | 3 | 2 | 2 | 2 | 3 | 18 |
| M | C | 4 | 1 | 1 | 2 | 2 | 4 | 3 | 4 | 4 | 1 | 26 |
| M | B | 2 | 3 | 3 | 4 | 1 | 1 | 4 | 1 | 1 | 1 | 21 |
| M | A | 2 | 2 | 2 | 3 | 2 | 2 | 3 | 2 | 3 | 2 | 23 |
| M | B | 2 | 3 | 4 | 2 | 1 | 2 | 2 | 1 | 3 | 1 | 21 |
| M | C | 1 | 3 | 3 | 2 | 1 | 2 | 3 | 2 | 3 | 2 | 22 |
| W | C | 1 | 1 | 1 | 1 | 1 | 3 | 3 | 1 | 1 | 1 | 14 |
| M | C | 2 | 3 | 2 | 2 | 1 | 2 | 3 | 3 | 4 | 2 | 24 |
| M | A | 1 | 2 | 1 | 2 | 1 | 1 | 2 | 1 | 3 | 3 | 17 |
| W | A | 1 | 1 | 1 | 1 | 1 | 2 | 1 | 1 | 3 | 1 | 13 |
| M | B | 2 | 1 | 1 | 1 | 1 | 1 | 2 | 4 | 3 | 1 | 17 |
| W | C | 1 | 1 | 3 | 1 | 1 | 1 | 4 | 4 | 4 | 2 | 22 |

|   |   |   |   |   |   |   |   |   |   |   |   |    |
|---|---|---|---|---|---|---|---|---|---|---|---|----|
| M | B | 3 | 2 | 2 | 3 | 2 | 4 | 2 | 3 | 3 | 1 | 25 |
| M | B | 2 | 3 | 3 | 1 | 1 | 2 | 2 | 2 | 3 | 3 | 22 |
| M | B | 2 | 4 | 2 | 1 | 1 | 1 | 1 | 1 | 1 | 1 | 15 |
| M | A | 3 | 3 | 2 | 1 | 1 | 3 | 2 | 2 | 3 | 1 | 21 |
| W | B | 1 | 3 | 3 | 1 | 1 | 2 | 3 | 2 | 2 | 2 | 20 |
| W | B | 3 | 2 | 2 | 1 | 1 | 3 | 2 | 2 | 2 | 2 | 20 |
| M | C | 2 | 1 | 2 | 1 | 1 | 2 | 3 | 1 | 2 | 1 | 16 |
| W | A | 1 | 1 | 1 | 2 | 1 | 1 | 3 | 4 | 3 | 1 | 18 |
| M | C | 3 | 2 | 2 | 2 | 1 | 3 | 3 | 1 | 2 | 3 | 22 |
| M | C | 2 | 3 | 3 | 3 | 2 | 2 | 3 | 3 | 4 | 4 | 29 |
| M | B | 2 | 2 | 1 | 1 | 1 | 3 | 2 | 1 | 4 | 2 | 19 |
| M | B | 3 | 2 | 1 | 1 | 2 | 3 | 1 | 3 | 3 | 1 | 20 |
| W | B | 0 | 0 | 0 | 0 | 0 | 0 | 0 | 0 | 0 | 0 | 0  |
| W | B | 2 | 2 | 2 | 2 | 2 | 2 | 2 | 2 | 2 | 2 | 20 |
| W | A | 2 | 1 | 2 | 2 | 2 | 2 | 2 | 2 | 2 | 2 | 19 |
| M | A | 1 | 1 | 3 | 4 | 1 | 3 | 3 | 4 | 1 | 1 | 22 |
| M | B | 3 | 3 | 2 | 2 | 3 | 2 | 2 | 2 | 3 | 2 | 24 |
| W | A | 2 | 2 | 3 | 2 | 2 | 2 | 3 | 2 | 2 | 2 | 22 |
| W | B | 1 | 1 | 1 | 1 | 1 | 2 | 3 | 2 | 1 | 1 | 14 |
| W | B | 1 | 1 | 2 | 1 | 1 | 1 | 1 | 1 | 1 | 1 | 11 |
| W | C | 1 | 1 | 3 | 1 | 1 | 2 | 3 | 2 | 3 | 1 | 18 |
| W | B | 2 | 2 | 2 | 2 | 2 | 2 | 2 | 3 | 4 | 1 | 22 |
| W | B | 1 | 1 | 1 | 1 | 1 | 2 | 2 | 1 | 2 | 1 | 13 |
| W | B | 2 | 2 | 3 | 2 | 1 | 2 | 2 | 2 | 1 | 2 | 19 |
| M | C | 2 | 2 | 3 | 2 | 1 | 2 | 4 | 3 | 3 | 3 | 25 |
| W | B | 2 | 2 | 1 | 1 | 1 | 2 | 1 | 2 | 3 | 1 | 16 |
| W | C | 1 | 1 | 1 | 1 | 1 | 1 | 1 | 1 | 1 | 1 | 10 |
| W | B | 2 | 2 | 3 | 2 | 3 | 2 | 2 | 1 | 2 | 1 | 20 |
| W | C | 2 | 2 | 2 | 2 | 2 | 2 | 2 | 2 | 2 | 2 | 20 |
| M | C | 4 | 2 | 3 | 4 | 1 | 1 | 1 | 1 | 4 | 1 | 22 |
| M | C | 2 | 3 | 1 | 1 | 1 | 1 | 1 | 1 | 1 | 1 | 13 |
| M | C | 1 | 3 | 1 | 1 | 1 | 2 | 2 | 1 | 3 | 1 | 16 |
| M | C | 0 | 0 | 0 | 0 | 0 | 0 | 0 | 0 | 0 | 0 | 0  |
| W | C | 1 | 1 | 1 | 1 | 1 | 2 | 3 | 1 | 1 | 1 | 13 |
| W | B | 3 | 2 | 2 | 2 | 2 | 3 | 3 | 2 | 3 | 2 | 24 |
| W | B | 3 | 3 | 3 | 4 | 2 | 2 | 3 | 1 | 3 | 3 | 27 |
| M | C | 3 | 2 | 1 | 2 | 1 | 2 | 2 | 3 | 3 | 1 | 20 |
| W | B | 2 | 1 | 3 | 1 | 1 | 1 | 3 | 1 | 1 | 1 | 15 |
| M | C | 2 | 3 | 2 | 3 | 2 | 2 | 3 | 3 | 3 | 2 | 25 |
