# Supplementary material for: Reliability, Validity, and Unidimensionality of the Korean Version of the Pornography Craving Questionnaire Based on the Classical Test Theory and Item Response Theory
Source: PubMed Central journal article supplement — Psychiatry Investig. 2021 Jun 17;18(6):530–8. doi: 10.30773/pi.2020.0401 (PMC8256136; doi:10.30773/pi.2020.0401), 2021-06-17
Supplement: pi-2020-0401-suppl3.pdf [file pi-2020-0401-suppl3.pdf]

Supplementary table 3. Item goodness-of-fit for the 12 Likert scale items of the measurement tool  
 — Korean version of the Pornography Craving Questionnaire (K-PCQ) based on Rasch model.

| ENTRYS | MEASURES | SCALES | SCORES | MISSING | INFORMATION | INCONSISTENCY | OUTLIERS | ODDS  | PROBABILITY | WEIGHT | OBJECTS | EXPOSURE | PERMISSIONS | WEIGHTS | INDICES | OUTPUTS | MODELS | RECORDS | NAMES |
|--------|----------|--------|--------|---------|-------------|---------------|----------|-------|-------------|--------|---------|----------|-------------|---------|---------|---------|--------|---------|-------|
| 1      | -0.99    | 1      | 225    | 670     | 1.46        | 4.07          | 1.41     | 6.41  | 0.66        | 1      | 2356    | 363      | 0.76        | -0.99   | 209     | 1       | R      | .       | 10001 |
| 2      | -0.52    | 1      | 266    | 570     | 1.04        | 0.42          | 1.13     | 1.42  | 0.72        | 1      | 478     | 415      | 0.92        | -0.52   | 195     | 1       | R      | .       | 10002 |
| 3      | -0.03    | 1      | 258    | 088     | -0.44       | 0.43          | 0.89     | -0.12 | 0.93        | 1      | 6463    | 451      | 0.81        | -0.03   | 105     | 1       | R      | .       | 10003 |
| 4      | -0.08    | 1      | 253    | 087     | -0.71       | 0.44          | 0.93     | -0.26 | 0.92        | 1      | 5585    | 4670     | 0.98        | -0.08   | 130     | 1       | R      | .       | 10004 |

|   |              |   |             |             |                            |                                 |                                 |                             |                             |                            |                            |   |                        |                        |                                 |                            |                                      |                            |                            |   |   |   |                       |
|---|--------------|---|-------------|-------------|----------------------------|---------------------------------|---------------------------------|-----------------------------|-----------------------------|----------------------------|----------------------------|---|------------------------|------------------------|---------------------------------|----------------------------|--------------------------------------|----------------------------|----------------------------|---|---|---|-----------------------|
| 5 | 0.<br>0<br>7 | 1 | 2<br>2<br>6 | 4<br>7<br>3 | 0<br>.<br>0<br>8           | 1<br>.<br>1<br>8<br>4<br>2      | 1<br>.<br>5<br>8<br>1<br>2      | 0.<br>9<br>8<br>4<br>4      | -<br>0.<br>0<br>7<br>9      | 0<br>.<br>6<br>8<br>8      | 0<br>.<br>6<br>8<br>8      | 1 | 5<br>7<br>6<br>7       | 5<br>0.<br>6<br>6<br>6 | 0<br>.<br>6<br>7<br>7<br>4      | 0<br>.<br>9<br>4<br>6<br>9 | 0<br>.<br>0<br>6<br>4<br>6           | 1<br>5<br>7<br>.<br>2      | 1<br>2<br>3<br>.<br>9<br>5 | 1 | R | . | I<br>0<br>0<br>0<br>5 |
| 6 | 0.<br>2<br>9 | 1 | 2<br>2<br>6 | 4<br>4<br>0 | 0<br>.<br>0<br>8           | 0<br>.<br>9<br>4<br>1<br>4      | -<br>0<br>.<br>4<br>4<br>9<br>1 | 1.<br>0<br>8<br>9<br>5<br>1 | 0.<br>6<br>9<br>1<br>1      | 0<br>.<br>6<br>7<br>5<br>5 | 0<br>.<br>6<br>7<br>5<br>5 | 1 | 6<br>2.<br>6<br>2<br>1 | 5<br>2.<br>6<br>0<br>1 | 0<br>.<br>6<br>5<br>6<br>8<br>2 | 0<br>.<br>8<br>0<br>0<br>2 | 0<br>.<br>2<br>5<br>0<br>9<br>2<br>2 | 1<br>4<br>5<br>.<br>2<br>2 | 1<br>0<br>9<br>.<br>2<br>1 | 1 | R | . | I<br>0<br>0<br>0<br>6 |
| 7 | 0.<br>3<br>2 | 1 | 2<br>2<br>6 | 4<br>3<br>6 | 0<br>.<br>0<br>9           | 0<br>.<br>7<br>4<br>0<br>9      | -<br>2<br>.<br>3<br>9<br>9<br>3 | 0.<br>7<br>2<br>9<br>2<br>3 | -<br>2.<br>1<br>4<br>9<br>3 | 0<br>.<br>7<br>0<br>4<br>3 | 0<br>.<br>7<br>0<br>4<br>3 | 1 | 6<br>8.<br>4<br>4<br>7 | 5<br>3.<br>0<br>5<br>4 | 0<br>.<br>6<br>5<br>4<br>2<br>7 | 0<br>.<br>7<br>0<br>4<br>4 | 0<br>.<br>3<br>2<br>7<br>5           | 1<br>4<br>3<br>.<br>7<br>5 | 1<br>0<br>7<br>.<br>3<br>7 | 1 | R | . | I<br>0<br>0<br>0<br>7 |
| 8 | 0.<br>3<br>8 | 1 | 2<br>2<br>6 | 4<br>2<br>8 | 0<br>.<br>0<br>9           | 0<br>.<br>5<br>7<br>9<br>1      | -<br>4<br>.<br>1<br>4<br>9<br>4 | 0.<br>5<br>2<br>9<br>7<br>5 | -<br>4.<br>0<br>7<br>9<br>5 | 0<br>.<br>7<br>2<br>8      | 0<br>.<br>7<br>2<br>8      | 1 | 6<br>6.<br>0<br>1<br>9 | 5<br>2.<br>9<br>7<br>6 | 0<br>.<br>6<br>4<br>8<br>7      | 0<br>.<br>6<br>1<br>3<br>6 | 0<br>.<br>3<br>7<br>7                | 1<br>4<br>0<br>.<br>7<br>5 | 1<br>0<br>3<br>.<br>6<br>5 | 1 | R | . | I<br>0<br>0<br>0<br>8 |
| 9 | 0.<br>8<br>1 | 1 | 2<br>2<br>6 | 3<br>7<br>6 | 0<br>.<br>1<br>8<br>4<br>5 | 0<br>.<br>8<br>2<br>1<br>9<br>2 | -<br>1<br>.<br>2<br>7<br>9<br>2 | 0.<br>7<br>5<br>2<br>7<br>2 | -<br>1.<br>6<br>3<br>9<br>2 | 0<br>.<br>6<br>4<br>5<br>3 | 0<br>.<br>6<br>4<br>5<br>3 | 1 | 6<br>3.<br>1<br>0<br>7 | 5<br>8.<br>2<br>3<br>7 | 0<br>.<br>6<br>0<br>7<br>5      | 0<br>.<br>6<br>5<br>4<br>9 | 0<br>.<br>8<br>1<br>1                | 1<br>1<br>9<br>.<br>2<br>1 | 7<br>8<br>.<br>3<br>8      | 1 | R | . | I<br>0<br>0<br>0<br>9 |

|        |                   |   |             |             |             |             |             |              |              |             |             |   |              |              |             |             |             |             |             |   |   |   |                       |
|--------|-------------------|---|-------------|-------------|-------------|-------------|-------------|--------------|--------------|-------------|-------------|---|--------------|--------------|-------------|-------------|-------------|-------------|-------------|---|---|---|-----------------------|
| 1<br>0 | 0.<br>2<br>2      | 1 | 2<br>2<br>6 | 4<br>5<br>0 | 0<br>.<br>0 | 0<br>.<br>9 | 0<br>.<br>1 | 0.<br>8<br>7 | -<br>0.<br>5 | 0<br>.<br>8 | 0<br>.<br>6 | 1 | 6<br>0.<br>1 | 5<br>1.<br>7 | 0<br>.<br>6 | 0<br>.<br>8 | 0<br>.<br>2 | 1<br>4<br>8 | 1<br>1<br>3 | 1 | R | . | I<br>0<br>0<br>1<br>0 |
| 1<br>1 | -<br>0.<br>9<br>2 | 1 | 2<br>2<br>5 | 6<br>5<br>5 | 0<br>.<br>0 | 1<br>.<br>9 | 7<br>.<br>6 | 2.<br>3<br>0 | 9.<br>1<br>1 | 0<br>.<br>6 | 0<br>.<br>4 | 1 | 2<br>5.<br>3 | 3<br>9.<br>4 | 0<br>.<br>7 | 1<br>.<br>4 | -<br>0<br>. | 1<br>9<br>8 | 1<br>7<br>6 | 1 | R | . | I<br>0<br>0<br>1<br>1 |
| 1<br>2 | 0.<br>4<br>5      | 1 | 2<br>2<br>5 | 4<br>1<br>7 | 0<br>.<br>0 | 0<br>.<br>7 | -<br>1<br>. | 0.<br>6<br>3 | -<br>2.<br>9 | 0<br>.<br>8 | 0<br>.<br>6 | 1 | 6<br>6.<br>8 | 5<br>3.<br>8 | 0<br>.<br>6 | 0<br>.<br>6 | 0<br>.<br>4 | 1<br>3<br>6 | 9<br>8<br>. | 1 | R | . | I<br>0<br>0<br>1<br>2 |
