# Supplementary material for: Reliability, Validity, and Unidimensionality of the Korean Version of the Pornography Craving Questionnaire Based on the Classical Test Theory and Item Response Theory
Source: PubMed Central journal article supplement — Psychiatry Investig. 2021 Jun 17;18(6):530–8. doi: 10.30773/pi.2020.0401 (PMC8256136; doi:10.30773/pi.2020.0401), 2021-06-17
Supplement: pi-2020-0401-suppl4.pdf [file pi-2020-0401-suppl4.pdf]

Supplementary table 4. Person goodness-of-fit for the 12 Likert scale items of the measurement tool — Korean version of the Pornography Craving Questionnaire (K-PCQ) based on Rasch model.

| ENTRY | MEASURE | STATUS | COUNT | SCORE | MODLSE | IN.MSQ | IN.ZSTD | OUT.MSQ | OUT.ZSTD | DISPLACE |
|-------|---------|--------|-------|-------|--------|--------|---------|---------|----------|----------|
| 78    | 5.39    | 0      | 12    | 84    | 1.81   | 1.0000 | 0       | 1.0000  | 0        | 0.01     |
| 122   | 2.47    | 1      | 12    | 78    | 0.4    | 1.7298 | 1.3017  | 4.1786  | 3.2742   | 0        |
| 141   | 1.75    | 1      | 12    | 72    | 0.31   | 0.4169 | -1.7596 | 0.4610  | -1.4095  | 0        |
| 85    | 0.75    | 1      | 12    | 59    | 0.26   | 4.7881 | 5.2548  | 4.8661  | 5.3849   | 0        |
| 117   | 0.75    | 1      | 12    | 59    | 0.26   | 0.5469 | -1.2295 | 0.6482  | -0.8794  | 0        |
| 80    | 0.62    | 1      | 12    | 57    | 0.26   | 0.4119 | -1.7696 | 0.4293  | -1.7096  | 0        |
| 191   | 0.36    | 1      | 12    | 53    | 0.25   | 0.5957 | -1.0594 | 0.5833  | -1.1094  | 0        |
| 207   | 0.17    | 1      | 12    | 50    | 0.25   | 0.8683 | -0.2191 | 0.8658  | -0.2291  | 0        |
| 67    | 0.11    | 1      | 12    | 49    | 0.25   | 0.8460 | -0.2892 | 0.8612  | -0.2491  | 0        |
| 171   | 0.11    | 1      | 12    | 49    | 0.25   | 0.8553 | -0.2591 | 0.8819  | -0.1891  | 0        |
| 180   | 0.11    | 1      | 12    | 49    | 0.25   | 0.2528 | -2.7197 | 0.2545  | -2.7097  | 0        |
| 1     | 0.04    | 1      | 12    | 48    | 0.25   | 0.3395 | -2.2297 | 0.3481  | -2.1897  | 0        |
| 120   | 0.04    | 1      | 12    | 48    | 0.25   | 1.8557 | 1.9119  | 1.8684  | 1.9419   | 0        |
| 146   | 0.04    | 1      | 12    | 48    | 0.25   | 1.9758 | 2.122   | 1.9554  | 2.092    | 0        |
| 158   | 0.04    | 1      | 12    | 48    | 0.25   | 0.3652 | -2.0996 | 0.3774  | -2.0396  | 0        |
| 187   | -0.02   | 1      | 12    | 47    | 0.25   | 0.2256 | -2.9498 | 0.2300  | -2.9298  | 0        |
| 161   | -0.08   | 1      | 12    | 46    | 0.25   | 0.3539 | -2.1996 | 0.3553  | -2.1896  | 0        |
| 196   | -0.08   | 1      | 12    | 46    | 0.25   | 0.6363 | -0.9794 | 0.6550  | -0.9193  | 0        |
| 68    | -0.14   | 1      | 12    | 45    | 0.25   | 1.5056 | 1.2915  | 1.5007  | 1.2815   | 0        |
| 140   | -0.14   | 1      | 12    | 45    | 0.25   | 0.5715 | -1.2394 | 0.5653  | -1.2594  | 0        |
| 3     | -0.21   | 1      | 12    | 44    | 0.25   | 1.2160 | 0.6712  | 1.2067  | 0.6412   | 0        |
| 56    | -0.27   | 1      | 12    | 43    | 0.25   | 0.6102 | -1.0994 | 0.6026  | -1.1294  | 0        |
| 132   | -0.27   | 1      | 12    | 43    | 0.25   | 0.3316 | -2.3697 | 0.3269  | -2.3897  | 0        |
| 159   | -0.27   | 1      | 12    | 43    | 0.25   | 0.8163 | -0.4092 | 0.7981  | -0.4592  | 0        |
| 163   | -0.27   | 1      | 12    | 43    | 0.25   | 0.9920 | 0.101   | 0.9974  | 0.121    | 0        |
| 112   | -0.33   | 1      | 12    | 42    | 0.25   | 0.1192 | -3.9999 | 0.1211  | -3.9699  | 0        |
| 157   | -0.33   | 1      | 12    | 42    | 0.25   | 0.3734 | -2.1496 | 0.3762  | -2.1296  | 0        |
| 169   | -0.33   | 1      | 12    | 42    | 0.25   | 1.8835 | 2.0319  | 1.8612  | 1.9919   | 0        |
| 176   | -0.39   | 1      | 12    | 41    | 0.25   | 0.3497 | -2.2797 | 0.3555  | -2.2396  | 0        |
| 48    | -0.46   | 1      | 12    | 40    | 0.25   | 0.9697 | 0.041   | 0.9461  | -0.0191  | 0        |
| 61    | -0.46   | 1      | 12    | 40    | 0.25   | 2.0053 | 2.242   | 1.9428  | 2.1319   | 0        |
| 26    | -0.52   | 1      | 12    | 39    | 0.25   | 1.1356 | 0.4711  | 1.1412  | 0.4911   | 0        |
| 160   | -0.52   | 1      | 12    | 39    | 0.25   | 1.2948 | 0.8513  | 1.3265  | 0.9213   | 0        |
| 69    | -0.59   | 1      | 12    | 38    | 0.26   | 0.2233 | -3.0398 | 0.2351  | -2.9498  | 0        |
| 153   | -0.65   | 1      | 12    | 37    | 0.26   | 1.0656 | 0.3011  | 1.1027  | 0.3911   | 0        |

|     |       |   |    |    |      |        |         |        |         |   |
|-----|-------|---|----|----|------|--------|---------|--------|---------|---|
| 45  | -0.72 | 1 | 12 | 36 | 0.26 | 0.5820 | -1.1794 | 0.5613 | -1.2594 | 0 |
| 92  | -0.72 | 1 | 12 | 36 | 0.26 | 0.8599 | -0.2591 | 0.8311 | -0.3492 | 0 |
| 107 | -0.72 | 1 | 12 | 36 | 0.26 | 0.3791 | -2.0596 | 0.3916 | -1.9896 | 0 |
| 145 | -0.72 | 1 | 11 | 33 | 0.27 | 1.0844 | 0.3411  | 1.0927 | 0.3611  | 0 |
| 154 | -0.72 | 1 | 12 | 36 | 0.26 | 1.6106 | 1.4916  | 1.5432 | 1.3615  | 0 |
| 188 | -0.72 | 1 | 12 | 36 | 0.26 | 1.3508 | 0.9614  | 1.2920 | 0.8313  | 0 |
| 195 | -0.72 | 1 | 12 | 36 | 0.26 | 0.5630 | -1.2494 | 0.5622 | -1.2494 | 0 |
| 148 | -0.79 | 1 | 12 | 35 | 0.26 | 1.4065 | 1.0714  | 1.3353 | 0.9213  | 0 |
| 172 | -0.79 | 1 | 12 | 35 | 0.26 | 2.0800 | 2.2921  | 1.9589 | 2.092   | 0 |
| 177 | -0.79 | 1 | 12 | 35 | 0.26 | 2.9601 | 3.543   | 2.8046 | 3.3328  | 0 |
| 203 | -0.79 | 1 | 12 | 35 | 0.26 | 1.4741 | 1.2115  | 1.4709 | 1.2015  | 0 |
| 116 | -0.86 | 1 | 12 | 34 | 0.27 | 0.8217 | -0.3592 | 0.7330 | -0.6293 | 0 |
| 125 | -0.86 | 1 | 12 | 34 | 0.27 | 0.5945 | -1.0994 | 0.6192 | -1.0094 | 0 |
| 50  | -0.93 | 1 | 12 | 33 | 0.27 | 0.8186 | -0.3592 | 0.8073 | -0.3892 | 0 |
| 133 | -0.93 | 1 | 12 | 33 | 0.27 | 0.7500 | -0.5693 | 0.6916 | -0.7493 | 0 |
| 138 | -0.93 | 1 | 12 | 33 | 0.27 | 0.9044 | -0.1191 | 0.9706 | 0.061   | 0 |
| 178 | -0.93 | 1 | 12 | 33 | 0.27 | 0.9286 | -0.0591 | 0.8942 | -0.1491 | 0 |
| 225 | -0.93 | 1 | 12 | 33 | 0.27 | 0.2889 | -2.4597 | 0.2750 | -2.5197 | 0 |
| 13  | -1.01 | 1 | 12 | 32 | 0.27 | 1.5328 | 1.2915  | 1.4334 | 1.0814  | 0 |
| 91  | -1.01 | 1 | 12 | 32 | 0.27 | 2.7882 | 3.2028  | 2.6394 | 2.9826  | 0 |
| 104 | -1.01 | 1 | 12 | 32 | 0.27 | 0.8135 | -0.3692 | 0.8345 | -0.2992 | 0 |
| 126 | -1.01 | 1 | 12 | 32 | 0.27 | 0.5723 | -1.1494 | 0.4828 | -1.4695 | 0 |
| 130 | -1.01 | 1 | 12 | 32 | 0.27 | 0.5312 | -1.2995 | 0.4733 | -1.5095 | 0 |
| 105 | -1.08 | 1 | 12 | 31 | 0.28 | 1.3426 | 0.9013  | 1.3000 | 0.8113  | 0 |
| 123 | -1.08 | 1 | 12 | 31 | 0.28 | 0.7530 | -0.5292 | 0.7742 | -0.4592 | 0 |
| 204 | -1.08 | 1 | 12 | 31 | 0.28 | 1.0128 | 0.171   | 0.9836 | 0.101   | 0 |
| 101 | -1.12 | 1 | 11 | 28 | 0.3  | 1.0093 | 0.161   | 1.2564 | 0.6913  | 0 |
| 2   | -1.16 | 1 | 12 | 30 | 0.28 | 0.5807 | -1.0794 | 0.6395 | -0.8494 | 0 |
| 35  | -1.16 | 1 | 12 | 30 | 0.28 | 0.3868 | -1.8496 | 0.4560 | -1.5095 | 0 |
| 47  | -1.16 | 1 | 12 | 30 | 0.28 | 1.5667 | 1.3216  | 1.5453 | 1.2615  | 0 |
| 89  | -1.16 | 1 | 12 | 30 | 0.28 | 1.6813 | 1.5217  | 1.5988 | 1.3516  | 0 |
| 106 | -1.16 | 1 | 12 | 30 | 0.28 | 0.9568 | 0.031   | 0.8259 | -0.2992 | 0 |
| 134 | -1.16 | 1 | 12 | 30 | 0.28 | 1.7979 | 1.7218  | 1.8682 | 1.8019  | 0 |
| 174 | -1.16 | 1 | 12 | 30 | 0.28 | 0.8701 | -0.1891 | 0.8054 | -0.3592 | 0 |
| 223 | -1.16 | 1 | 12 | 30 | 0.28 | 0.5330 | -1.2495 | 0.4399 | -1.5796 | 0 |
| 4   | -1.25 | 1 | 12 | 29 | 0.29 | 2.4515 | 2.6525  | 2.2898 | 2.3823  | 0 |
| 15  | -1.25 | 1 | 12 | 29 | 0.29 | 1.1613 | 0.5112  | 1.1936 | 0.5712  | 0 |
| 76  | -1.25 | 1 | 12 | 29 | 0.29 | 0.4576 | -1.5095 | 0.3896 | -1.7496 | 0 |
| 147 | -1.25 | 1 | 12 | 29 | 0.29 | 1.7443 | 1.6117  | 1.7791 | 1.6318  | 0 |
| 150 | -1.25 | 1 | 12 | 29 | 0.29 | 0.7242 | -0.5993 | 0.6891 | -0.6793 | 0 |

|     |       |   |    |    |      |        |         |        |         |   |
|-----|-------|---|----|----|------|--------|---------|--------|---------|---|
| 10  | -1.33 | 1 | 12 | 28 | 0.3  | 0.3406 | -1.9997 | 0.2570 | -2.3597 | 0 |
| 28  | -1.33 | 1 | 12 | 28 | 0.3  | 1.5156 | 1.2015  | 1.3266 | 0.8213  | 0 |
| 29  | -1.33 | 1 | 12 | 28 | 0.3  | 2.3440 | 2.4723  | 2.2492 | 2.2822  | 0 |
| 32  | -1.33 | 1 | 12 | 28 | 0.3  | 1.0519 | 0.2611  | 1.0152 | 0.181   | 0 |
| 42  | -1.33 | 1 | 12 | 28 | 0.3  | 0.3799 | -1.8196 | 0.3091 | -2.0797 | 0 |
| 49  | -1.33 | 1 | 12 | 28 | 0.3  | 0.6758 | -0.7293 | 0.6660 | -0.7293 | 0 |
| 53  | -1.33 | 1 | 12 | 28 | 0.3  | 0.1518 | -3.1698 | 0.1250 | -3.2899 | 0 |
| 63  | -1.33 | 1 | 12 | 28 | 0.3  | 0.3965 | -1.7396 | 0.3382 | -1.9397 | 0 |
| 84  | -1.33 | 1 | 12 | 28 | 0.3  | 0.1518 | -3.1698 | 0.1250 | -3.2899 | 0 |
| 151 | -1.33 | 1 | 12 | 28 | 0.3  | 1.3165 | 0.8213  | 1.4400 | 1.0314  | 0 |
| 170 | -1.33 | 1 | 12 | 28 | 0.3  | 3.5089 | 3.8335  | 2.8768 | 3.0529  | 0 |
| 181 | -1.33 | 1 | 12 | 28 | 0.3  | 2.4335 | 2.5924  | 2.7503 | 2.9028  | 0 |
| 9   | -1.42 | 1 | 12 | 27 | 0.3  | 1.5534 | 1.2516  | 1.4281 | 1.0014  | 0 |
| 55  | -1.42 | 1 | 12 | 27 | 0.3  | 0.3745 | -1.8096 | 0.3616 | -1.7796 | 0 |
| 70  | -1.42 | 1 | 12 | 27 | 0.3  | 0.4204 | -1.6096 | 0.3526 | -1.8196 | 0 |
| 77  | -1.42 | 1 | 12 | 27 | 0.3  | 0.2203 | -2.6198 | 0.1685 | -2.8598 | 0 |
| 127 | -1.42 | 1 | 12 | 27 | 0.3  | 0.9387 | 0.0009  | 1.0258 | 0.211   | 0 |
| 175 | -1.42 | 1 | 12 | 27 | 0.3  | 0.7164 | -0.5893 | 0.5838 | -0.9494 | 0 |
| 183 | -1.42 | 1 | 12 | 27 | 0.3  | 0.3364 | -1.9797 | 0.2539 | -2.3197 | 0 |
| 33  | -1.52 | 1 | 12 | 26 | 0.31 | 0.6722 | -0.7093 | 0.6366 | -0.7694 | 0 |
| 90  | -1.52 | 1 | 12 | 26 | 0.31 | 0.7268 | -0.5493 | 0.6199 | -0.8194 | 0 |
| 99  | -1.52 | 1 | 12 | 26 | 0.31 | 0.6750 | -0.6993 | 0.5656 | -0.9894 | 0 |
| 114 | -1.52 | 1 | 12 | 26 | 0.31 | 0.2940 | -2.1597 | 0.2216 | -2.4398 | 0 |
| 119 | -1.52 | 1 | 12 | 26 | 0.31 | 2.5372 | 2.6525  | 2.6102 | 2.6326  | 0 |
| 152 | -1.52 | 1 | 12 | 26 | 0.31 | 0.8709 | -0.1591 | 1.0493 | 0.261   | 0 |
| 165 | -1.52 | 1 | 12 | 26 | 0.31 | 0.2940 | -2.1597 | 0.2216 | -2.4398 | 0 |
| 182 | -1.52 | 1 | 12 | 26 | 0.31 | 1.5686 | 1.2616  | 1.4846 | 1.0815  | 0 |
| 198 | -1.52 | 1 | 12 | 26 | 0.31 | 0.9609 | 0.051   | 0.8465 | -0.1992 | 0 |
| 214 | -1.52 | 1 | 12 | 26 | 0.31 | 1.0908 | 0.3511  | 0.9749 | 0.101   | 0 |
| 16  | -1.62 | 1 | 12 | 25 | 0.32 | 1.1381 | 0.4511  | 1.0938 | 0.3511  | 0 |
| 23  | -1.62 | 1 | 12 | 25 | 0.32 | 1.9130 | 1.7819  | 1.8319 | 1.5918  | 0 |
| 36  | -1.62 | 1 | 12 | 25 | 0.32 | 0.4702 | -1.3495 | 0.3601 | -1.6996 | 0 |
| 66  | -1.62 | 1 | 12 | 25 | 0.32 | 1.6005 | 1.2916  | 1.6857 | 1.3817  | 0 |
| 109 | -1.62 | 1 | 12 | 25 | 0.32 | 0.1808 | -2.7898 | 0.1639 | -2.7598 | 0 |
| 200 | -1.62 | 1 | 12 | 25 | 0.32 | 0.3467 | -1.8597 | 0.2987 | -1.9797 | 0 |
| 12  | -1.72 | 1 | 12 | 24 | 0.33 | 0.2754 | -2.1597 | 0.2402 | -2.2198 | 0 |
| 25  | -1.72 | 1 | 12 | 24 | 0.33 | 0.2754 | -2.1597 | 0.2402 | -2.2198 | 0 |
| 40  | -1.72 | 1 | 12 | 24 | 0.33 | 0.2754 | -2.1597 | 0.2402 | -2.2198 | 0 |
| 57  | -1.72 | 1 | 12 | 24 | 0.33 | 0.7520 | -0.4492 | 0.9109 | -0.0291 | 0 |
| 60  | -1.72 | 1 | 12 | 24 | 0.33 | 0.2754 | -2.1597 | 0.2402 | -2.2198 | 0 |

|     |       |   |    |    |      |        |         |        |         |   |
|-----|-------|---|----|----|------|--------|---------|--------|---------|---|
| 64  | -1.72 | 1 | 12 | 24 | 0.33 | 0.5710 | -0.9794 | 0.5946 | -0.8394 | 0 |
| 65  | -1.72 | 1 | 12 | 24 | 0.33 | 0.2754 | -2.1597 | 0.2402 | -2.2198 | 0 |
| 74  | -1.72 | 1 | 12 | 24 | 0.33 | 1.4536 | 1.0315  | 1.4418 | 0.9814  | 0 |
| 79  | -1.72 | 1 | 12 | 24 | 0.33 | 0.2754 | -2.1597 | 0.2402 | -2.2198 | 0 |
| 96  | -1.72 | 1 | 12 | 24 | 0.33 | 0.2754 | -2.1597 | 0.2402 | -2.2198 | 0 |
| 102 | -1.72 | 1 | 12 | 24 | 0.33 | 0.2754 | -2.1597 | 0.2402 | -2.2198 | 0 |
| 121 | -1.72 | 1 | 12 | 24 | 0.33 | 1.0200 | 0.191   | 1.1631 | 0.4812  | 0 |
| 139 | -1.72 | 1 | 12 | 24 | 0.33 | 0.7969 | -0.3292 | 0.6126 | -0.7894 | 0 |
| 192 | -1.72 | 1 | 12 | 24 | 0.33 | 0.2754 | -2.1597 | 0.2402 | -2.2198 | 0 |
| 193 | -1.72 | 1 | 12 | 24 | 0.33 | 0.2754 | -2.1597 | 0.2402 | -2.2198 | 0 |
| 34  | -1.84 | 1 | 12 | 23 | 0.34 | 0.9242 | -0.0091 | 0.7916 | -0.2992 | 0 |
| 108 | -1.84 | 1 | 12 | 23 | 0.34 | 0.8207 | -0.2592 | 0.7914 | -0.2992 | 0 |
| 189 | -1.84 | 1 | 12 | 23 | 0.34 | 0.5645 | -0.9694 | 0.6026 | -0.7994 | 0 |
| 206 | -1.84 | 1 | 12 | 23 | 0.34 | 1.0513 | 0.2611  | 0.9847 | 0.131   | 0 |
| 7   | -1.96 | 1 | 12 | 22 | 0.36 | 1.7442 | 1.4417  | 1.9587 | 1.682   | 0 |
| 11  | -1.96 | 1 | 12 | 22 | 0.36 | 2.9494 | 2.8829  | 2.8695 | 2.7129  | 0 |
| 18  | -1.96 | 1 | 12 | 22 | 0.36 | 0.6376 | -0.7094 | 0.5929 | -0.7994 | 0 |
| 83  | -1.96 | 1 | 12 | 22 | 0.36 | 0.6198 | -0.7694 | 0.6903 | -0.5393 | 0 |
| 100 | -1.96 | 1 | 12 | 22 | 0.36 | 0.8560 | -0.1591 | 0.9021 | -0.0391 | 0 |
| 135 | -1.96 | 1 | 12 | 22 | 0.36 | 0.5784 | -0.8894 | 0.4927 | -1.1095 | 0 |
| 197 | -1.96 | 1 | 12 | 22 | 0.36 | 1.2624 | 0.6713  | 0.8869 | -0.0691 | 0 |
| 211 | -1.96 | 1 | 12 | 22 | 0.36 | 2.1589 | 1.9922  | 1.6233 | 1.2316  | 0 |
| 30  | -2.03 | 1 | 11 | 19 | 0.4  | 0.5385 | -0.8895 | 0.6260 | -0.6294 | 0 |
| 124 | -2.09 | 1 | 12 | 21 | 0.38 | 1.4717 | 1.0015  | 1.2799 | 0.6813  | 0 |
| 37  | -2.24 | 1 | 12 | 20 | 0.4  | 2.7977 | 2.5628  | 1.7766 | 1.4018  | 0 |
| 51  | -2.24 | 1 | 12 | 20 | 0.4  | 2.7977 | 2.5628  | 1.7766 | 1.4018  | 0 |
| 54  | -2.24 | 1 | 12 | 20 | 0.4  | 1.2360 | 0.6012  | 0.9020 | -0.0191 | 0 |
| 94  | -2.24 | 1 | 12 | 20 | 0.4  | 0.4612 | -1.1595 | 0.5721 | -0.8194 | 0 |
| 164 | -2.24 | 1 | 12 | 20 | 0.4  | 0.4394 | -1.2296 | 0.5080 | -0.9995 | 0 |
| 217 | -2.24 | 1 | 12 | 20 | 0.4  | 1.2176 | 0.5712  | 1.0015 | 0.171   | 0 |
| 22  | -2.41 | 1 | 12 | 19 | 0.42 | 1.0628 | 0.2911  | 0.7915 | -0.2492 | 0 |
| 59  | -2.41 | 1 | 12 | 19 | 0.42 | 1.0611 | 0.2911  | 0.7874 | -0.2592 | 0 |
| 162 | -2.41 | 1 | 12 | 19 | 0.42 | 1.2777 | 0.6613  | 0.9824 | 0.141   | 0 |
| 222 | -2.41 | 1 | 12 | 19 | 0.42 | 1.9670 | 1.602   | 1.4370 | 0.9114  | 0 |
| 137 | -2.53 | 1 | 11 | 17 | 0.45 | 2.7252 | 2.2727  | 2.7638 | 2.3628  | 0 |
| 14  | -2.6  | 1 | 12 | 18 | 0.45 | 3.2703 | 2.7933  | 3.2628 | 2.8633  | 0 |
| 38  | -2.6  | 1 | 12 | 18 | 0.45 | 2.3594 | 1.9724  | 1.6672 | 1.2117  | 0 |
| 62  | -2.6  | 1 | 12 | 18 | 0.45 | 2.3594 | 1.9724  | 1.6672 | 1.2117  | 0 |
| 118 | -2.6  | 1 | 12 | 18 | 0.45 | 5.8041 | 4.4758  | 3.3577 | 2.9434  | 0 |
| 149 | -2.6  | 1 | 12 | 18 | 0.45 | 2.3639 | 1.9724  | 3.8355 | 3.3238  | 0 |

|     |       |   |    |    |      |        |         |        |         |   |
|-----|-------|---|----|----|------|--------|---------|--------|---------|---|
| 184 | -2.6  | 1 | 12 | 18 | 0.45 | 1.5473 | 1.0315  | 1.1309 | 0.4111  | 0 |
| 185 | -2.6  | 1 | 12 | 18 | 0.45 | 1.4898 | 0.9515  | 1.0618 | 0.2911  | 0 |
| 201 | -2.6  | 1 | 12 | 18 | 0.45 | 0.5328 | -0.8295 | 0.4958 | -0.9795 | 0 |
| 202 | -2.6  | 1 | 12 | 18 | 0.45 | 0.5094 | -0.8995 | 0.4768 | -1.0295 | 0 |
| 218 | -2.6  | 1 | 12 | 18 | 0.45 | 1.3689 | 0.7814  | 1.4573 | 0.9215  | 0 |
| 46  | -2.82 | 1 | 12 | 17 | 0.49 | 1.4497 | 0.8714  | 0.9568 | 0.111   | 0 |
| 81  | -2.82 | 1 | 12 | 17 | 0.49 | 0.5877 | -0.6394 | 0.5745 | -0.7194 | 0 |
| 155 | -2.82 | 1 | 12 | 17 | 0.49 | 2.8026 | 2.3128  | 1.7043 | 1.2317  | 0 |
| 21  | -3.09 | 1 | 12 | 16 | 0.55 | 0.7729 | -0.1992 | 0.8106 | -0.1492 | 0 |
| 24  | -3.09 | 1 | 12 | 16 | 0.55 | 1.7881 | 1.2618  | 1.8237 | 1.3218  | 0 |
| 41  | -3.09 | 1 | 12 | 16 | 0.55 | 1.5133 | 0.9315  | 1.0674 | 0.3111  | 0 |
| 88  | -3.09 | 1 | 12 | 16 | 0.55 | 1.9246 | 1.4119  | 1.1878 | 0.5012  | 0 |
| 93  | -3.09 | 1 | 12 | 16 | 0.55 | 1.1554 | 0.4512  | 0.8857 | 0.0009  | 0 |
| 110 | -3.09 | 1 | 12 | 16 | 0.55 | 3.6451 | 2.8736  | 2.0333 | 1.552   | 0 |
| 128 | -3.09 | 1 | 12 | 16 | 0.55 | 0.6250 | -0.5094 | 0.5839 | -0.6394 | 0 |
| 144 | -3.09 | 1 | 12 | 16 | 0.55 | 3.7377 | 2.9337  | 2.1798 | 1.7022  | 0 |
| 156 | -3.09 | 1 | 12 | 16 | 0.55 | 1.2206 | 0.5412  | 1.1074 | 0.3711  | 0 |
| 179 | -3.09 | 1 | 12 | 16 | 0.55 | 0.6773 | -0.3993 | 0.6883 | -0.3993 | 0 |
| 220 | -3.09 | 1 | 12 | 16 | 0.55 | 1.9825 | 1.472   | 1.1755 | 0.4812  | 0 |
| 17  | -3.43 | 1 | 12 | 15 | 0.62 | 2.6488 | 2.0026  | 1.4696 | 0.8515  | 0 |
| 20  | -3.43 | 1 | 12 | 15 | 0.62 | 2.6488 | 2.0026  | 1.4696 | 0.8515  | 0 |
| 27  | -3.43 | 1 | 12 | 15 | 0.62 | 0.6882 | -0.3293 | 0.6199 | -0.4594 | 0 |
| 52  | -3.43 | 1 | 12 | 15 | 0.62 | 2.7188 | 2.0627  | 1.5737 | 0.9716  | 0 |
| 82  | -3.43 | 1 | 12 | 15 | 0.62 | 1.2267 | 0.5412  | 0.7603 | -0.1892 | 0 |
| 86  | -3.43 | 1 | 12 | 15 | 0.62 | 0.5828 | -0.5494 | 0.5416 | -0.6395 | 0 |
| 97  | -3.43 | 1 | 12 | 15 | 0.62 | 1.2267 | 0.5412  | 0.7603 | -0.1892 | 0 |
| 113 | -3.43 | 1 | 12 | 15 | 0.62 | 2.6488 | 2.0026  | 1.4696 | 0.8515  | 0 |
| 115 | -3.43 | 1 | 12 | 15 | 0.62 | 0.8882 | 0.0309  | 0.7961 | -0.1192 | 0 |
| 129 | -3.43 | 1 | 12 | 15 | 0.62 | 3.4498 | 2.5934  | 4.4784 | 3.2145  | 0 |
| 143 | -3.43 | 1 | 12 | 15 | 0.62 | 1.7676 | 1.1918  | 2.1638 | 1.5722  | 0 |
| 168 | -3.43 | 1 | 12 | 15 | 0.62 | 0.8450 | -0.0392 | 0.9563 | 0.151   | 0 |
| 186 | -3.43 | 1 | 12 | 15 | 0.62 | 1.2267 | 0.5412  | 0.7603 | -0.1892 | 0 |
| 194 | -3.43 | 1 | 12 | 15 | 0.62 | 2.6488 | 2.0026  | 1.4696 | 0.8515  | 0 |
| 216 | -3.43 | 1 | 12 | 15 | 0.62 | 3.0351 | 2.303   | 2.2360 | 1.6422  | 0 |
| 219 | -3.43 | 1 | 12 | 15 | 0.62 | 2.7188 | 2.0627  | 1.5737 | 0.9716  | 0 |
| 6   | -3.68 | 1 | 11 | 13 | 0.75 | 0.6014 | -0.3994 | 0.4184 | -0.7496 | 0 |
| 87  | -3.9  | 1 | 12 | 14 | 0.75 | 1.7331 | 1.0717  | 0.9788 | 0.231   | 0 |
| 167 | -3.9  | 1 | 12 | 14 | 0.75 | 0.8054 | -0.0492 | 0.7318 | -0.1293 | 0 |
| 190 | -3.9  | 1 | 12 | 14 | 0.75 | 0.6966 | -0.2293 | 0.4796 | -0.5895 | 0 |
| 208 | -3.9  | 1 | 12 | 14 | 0.75 | 1.6852 | 1.0317  | 0.9127 | 0.1409  | 0 |

|     |       |    |    |    |      |         |         |         |         |       |
|-----|-------|----|----|----|------|---------|---------|---------|---------|-------|
| 209 | -3.9  | 1  | 12 | 14 | 0.75 | 0.5885  | -0.4294 | 0.3679  | -0.8396 | 0     |
| 213 | -3.9  | 1  | 12 | 14 | 0.75 | 0.6966  | -0.2293 | 0.4796  | -0.5895 | 0     |
| 31  | -4.66 | 1  | 12 | 13 | 1.03 | 0.9266  | 0.2509  | 0.6573  | 0.0107  | 0     |
| 72  | -4.66 | 1  | 12 | 13 | 1.03 | 0.7891  | 0.0908  | 0.4071  | -0.3396 | 0     |
| 73  | -4.66 | 1  | 12 | 13 | 1.03 | 0.7891  | 0.0908  | 0.4071  | -0.3396 | 0     |
| 75  | -4.66 | 1  | 12 | 13 | 1.03 | 0.7891  | 0.0908  | 0.4071  | -0.3396 | 0     |
| 98  | -4.66 | 1  | 12 | 13 | 1.03 | 0.7891  | 0.0908  | 0.4071  | -0.3396 | 0     |
| 103 | -4.66 | 1  | 12 | 13 | 1.03 | 0.7891  | 0.0908  | 0.4071  | -0.3396 | 0     |
| 111 | -4.66 | 1  | 12 | 13 | 1.03 | 0.7891  | 0.0908  | 0.4071  | -0.3396 | 0     |
| 142 | -4.66 | 1  | 12 | 13 | 1.03 | 0.7891  | 0.0908  | 0.4071  | -0.3396 | 0     |
| 210 | -4.66 | 1  | 12 | 13 | 1.03 | 0.7891  | 0.0908  | 0.4071  | -0.3396 | 0     |
| 226 | -4.66 | 1  | 12 | 13 | 1.03 | 0.9266  | 0.2509  | 0.6573  | 0.0107  | 0     |
| 5   | -5.91 | -1 | 12 | 12 | 1.84 | 1.0000  | 0       | 1.0000  | 0       | -0.01 |
| 8   | -5.91 | -1 | 12 | 12 | 1.84 | 1.0000  | 0       | 1.0000  | 0       | -0.01 |
| 19  | -5.91 | -1 | 12 | 12 | 1.84 | 1.0000  | 0       | 1.0000  | 0       | -0.01 |
| 39  | -5.91 | -1 | 12 | 12 | 1.84 | 1.0000  | 0       | 1.0000  | 0       | -0.01 |
| 43  | -5.91 | -1 | 12 | 12 | 1.84 | 1.0000  | 0       | 1.0000  | 0       | -0.01 |
| 44  | -5.91 | -1 | 12 | 12 | 1.84 | 1.0000  | 0       | 1.0000  | 0       | -0.01 |
| 58  | -5.91 | -1 | 12 | 12 | 1.84 | 1.0000  | 0       | 1.0000  | 0       | -0.01 |
| 71  | -5.91 | -1 | 12 | 12 | 1.84 | 1.0000  | 0       | 1.0000  | 0       | -0.01 |
| 95  | -5.91 | -1 | 12 | 12 | 1.84 | 1.0000  | 0       | 1.0000  | 0       | -0.01 |
| 131 | -5.91 | -1 | 12 | 12 | 1.84 | 1.0000  | 0       | 1.0000  | 0       | -0.01 |
| 136 | -5.91 | -1 | 12 | 12 | 1.84 | 1.0000  | 0       | 1.0000  | 0       | -0.01 |
| 166 | -5.91 | -1 | 12 | 12 | 1.84 | 1.0000  | 0       | 1.0000  | 0       | -0.01 |
| 173 | -5.91 | -1 | 12 | 12 | 1.84 | 1.0000  | 0       | 1.0000  | 0       | -0.01 |
| 199 | -5.91 | -1 | 12 | 12 | 1.84 | 1.0000  | 0       | 1.0000  | 0       | -0.01 |
| 205 | -5.91 | -1 | 12 | 12 | 1.84 | 1.0000  | 0       | 1.0000  | 0       | -0.01 |
| 212 | -5.91 | -1 | 12 | 12 | 1.84 | 1.0000  | 0       | 1.0000  | 0       | -0.01 |
| 215 | -5.91 | -1 | 12 | 12 | 1.84 | 1.0000  | 0       | 1.0000  | 0       | -0.01 |
| 221 | -5.91 | -1 | 12 | 12 | 1.84 | 1.0000  | 0       | 1.0000  | 0       | -0.01 |
| 224 | -5.91 | -1 | 12 | 12 | 1.84 | 1.0000  | 0       | 1.0000  | 0       | -0.01 |
| 18  |       |    |    |    |      | 42.0000 |         | 29.0000 |         |       |

| ENTRY | MEASURE | PTMA    | WEIGHT | OBSMATCH | EXPMATCH | PTMA-E | RMSR   | WMLE | INDF  | OUTDF | NAME |
|-------|---------|---------|--------|----------|----------|--------|--------|------|-------|-------|------|
| 78    | 5.39    | 0       | 1      | 100      | 100      | 0      | 0      | 5.39 | 0     | 0     | M    |
| 122   | 2.47    | -0.3057 | 1      | 50       | 52.89    | 0.297  | 0.9393 | 2.39 | 7.01  | 5.62  | M    |
| 141   | 1.75    | 0.586   | 1      | 58.333   | 39.315   | 0.4    | 0.608  | 1.72 | 12.45 | 10.4  | M    |
| 85    | 0.75    | -0.1987 | 1      | 8.3333   | 33.635   | 0.5013 | 2.4244 | 0.75 | 12.39 | 12.67 | M    |
| 117   | 0.75    | -0.5235 | 1      | 50       | 33.635   | 0.5013 | 0.8194 | 0.75 | 12.39 | 12.67 | M    |

|     |       |         |   |        |        |        |        |       |       |       |   |
|-----|-------|---------|---|--------|--------|--------|--------|-------|-------|-------|---|
| 80  | 0.62  | 0.341   | 1 | 25     | 36.049 | 0.507  | 0.7183 | 0.62  | 12.27 | 12.54 | M |
| 191 | 0.36  | 0.4681  | 1 | 41.667 | 36.357 | 0.5135 | 0.8788 | 0.36  | 12.52 | 12.68 | W |
| 207 | 0.17  | -0.0182 | 1 | 25     | 36.879 | 0.5159 | 1.0714 | 0.17  | 13.08 | 13.15 | W |
| 67  | 0.11  | 0.4567  | 1 | 41.667 | 35.258 | 0.5165 | 1.06   | 0.1   | 13.31 | 13.36 | W |
| 171 | 0.11  | 0.3733  | 1 | 50     | 35.258 | 0.5165 | 1.0659 | 0.1   | 13.31 | 13.36 | M |
| 180 | 0.11  | 0.7446  | 1 | 66.667 | 35.258 | 0.5165 | 0.5795 | 0.1   | 13.31 | 13.36 | M |
| 1   | 0.04  | 0.5448  | 1 | 33.333 | 33.59  | 0.5171 | 0.6728 | 0.04  | 13.54 | 13.58 | M |
| 120 | 0.04  | 0.5787  | 1 | 25     | 33.59  | 0.5171 | 1.5729 | 0.04  | 13.54 | 13.58 | M |
| 146 | 0.04  | 0.297   | 1 | 8.3333 | 33.59  | 0.5171 | 1.623  | 0.04  | 13.54 | 13.58 | M |
| 158 | 0.04  | 0       | 1 | 50     | 33.59  | 0.5171 | 0.6977 | 0.04  | 13.54 | 13.58 | M |
| 187 | -0.02 | 0.7207  | 1 | 50     | 31.917 | 0.5177 | 0.5491 | -0.02 | 13.78 | 13.8  | M |
| 161 | -0.08 | 0.7742  | 1 | 33.333 | 30.323 | 0.5183 | 0.6882 | -0.08 | 14.01 | 14.02 | M |
| 196 | -0.08 | -0.421  | 1 | 25     | 30.323 | 0.5183 | 0.9228 | -0.08 | 14.01 | 14.02 | W |
| 68  | -0.14 | 0.6111  | 1 | 0      | 29.658 | 0.519  | 1.4192 | -0.14 | 14.21 | 14.22 | M |
| 140 | -0.14 | 0.6634  | 1 | 41.667 | 29.658 | 0.519  | 0.8743 | -0.14 | 14.21 | 14.22 | M |
| 3   | -0.21 | 0.1628  | 1 | 16.667 | 29.673 | 0.5197 | 1.2741 | -0.2  | 14.39 | 14.39 | M |
| 56  | -0.27 | 0.4437  | 1 | 33.333 | 28.033 | 0.5204 | 0.9009 | -0.27 | 14.53 | 14.52 | M |
| 132 | -0.27 | 0.5902  | 1 | 58.333 | 28.033 | 0.5204 | 0.6641 | -0.27 | 14.53 | 14.52 | M |
| 159 | -0.27 | 0.5578  | 1 | 41.667 | 28.033 | 0.5204 | 1.042  | -0.27 | 14.53 | 14.52 | M |
| 163 | -0.27 | 0.423   | 1 | 25     | 28.033 | 0.5204 | 1.1487 | -0.27 | 14.53 | 14.52 | M |
| 112 | -0.33 | 0.8271  | 1 | 66.667 | 29.923 | 0.5211 | 0.397  | -0.33 | 14.62 | 14.61 | M |
| 157 | -0.33 | 0.6171  | 1 | 33.333 | 29.923 | 0.5211 | 0.7027 | -0.33 | 14.62 | 14.61 | M |
| 169 | -0.33 | 0.5415  | 1 | 8.3333 | 29.923 | 0.5211 | 1.5783 | -0.33 | 14.62 | 14.61 | M |
| 176 | -0.39 | 0.3974  | 1 | 58.333 | 28.387 | 0.5218 | 0.6775 | -0.39 | 14.65 | 14.64 | W |
| 48  | -0.46 | 0.3807  | 1 | 41.667 | 26.912 | 0.5224 | 1.1228 | -0.45 | 14.63 | 14.6  | M |
| 61  | -0.46 | 0.5419  | 1 | 8.3333 | 26.912 | 0.5224 | 1.6146 | -0.45 | 14.63 | 14.6  | W |
| 26  | -0.52 | 0.044   | 1 | 41.667 | 27.747 | 0.5229 | 1.2078 | -0.52 | 14.54 | 14.51 | M |
| 160 | -0.52 | -0.0028 | 1 | 16.667 | 27.747 | 0.5229 | 1.2897 | -0.52 | 14.54 | 14.51 | M |
| 69  | -0.59 | 0.6395  | 1 | 83.333 | 28.6   | 0.5233 | 0.5318 | -0.58 | 14.4  | 14.36 | M |
| 153 | -0.65 | 0.2728  | 1 | 41.667 | 30.529 | 0.5235 | 1.1521 | -0.64 | 14.19 | 14.14 | M |
| 45  | -0.72 | 0.2765  | 1 | 41.667 | 30.582 | 0.5233 | 0.8434 | -0.71 | 13.94 | 13.87 | M |
| 92  | -0.72 | 0.3191  | 1 | 33.333 | 30.582 | 0.5233 | 1.0252 | -0.71 | 13.94 | 13.87 | M |
| 107 | -0.72 | 0       | 1 | 58.333 | 30.582 | 0.5233 | 0.6807 | -0.71 | 13.94 | 13.87 | M |
| 145 | -0.72 | 0.4727  | 1 | 27.273 | 31.328 | 0.5416 | 1.1466 | -0.7  | 12.55 | 12.52 | W |
| 154 | -0.72 | 0.5732  | 1 | 25     | 30.582 | 0.5233 | 1.4031 | -0.71 | 13.94 | 13.87 | M |
| 188 | -0.72 | 0.2843  | 1 | 33.333 | 30.582 | 0.5233 | 1.2849 | -0.71 | 13.94 | 13.87 | M |
| 195 | -0.72 | 0.4945  | 1 | 33.333 | 30.582 | 0.5233 | 0.8295 | -0.71 | 13.94 | 13.87 | M |
| 148 | -0.79 | 0.4756  | 1 | 16.667 | 34.451 | 0.5228 | 1.297  | -0.78 | 13.64 | 13.55 | M |
| 172 | -0.79 | 0.6121  | 1 | 25     | 34.451 | 0.5228 | 1.5773 | -0.78 | 13.64 | 13.55 | M |
| 177 | -0.79 | 0.6561  | 1 | 8.3333 | 34.451 | 0.5228 | 1.8817 | -0.78 | 13.64 | 13.55 | M |

|     |       |         |   |        |        |        |        |       |       |       |   |
|-----|-------|---------|---|--------|--------|--------|--------|-------|-------|-------|---|
| 203 | -0.79 | 0.7594  | 1 | 25     | 34.451 | 0.5228 | 1.3279 | -0.78 | 13.64 | 13.55 | M |
| 116 | -0.86 | 0.8135  | 1 | 58.333 | 35.061 | 0.5218 | 0.9794 | -0.85 | 13.31 | 13.18 | M |
| 125 | -0.86 | 0.4795  | 1 | 50     | 35.061 | 0.5218 | 0.8331 | -0.85 | 13.31 | 13.18 | M |
| 50  | -0.93 | -0.5618 | 1 | 16.667 | 37.343 | 0.5201 | 0.9645 | -0.92 | 12.96 | 12.78 | W |
| 133 | -0.93 | 0.3569  | 1 | 33.333 | 37.343 | 0.5201 | 0.9232 | -0.92 | 12.96 | 12.78 | M |
| 138 | -0.93 | 0.7287  | 1 | 33.333 | 37.343 | 0.5201 | 1.0138 | -0.92 | 12.96 | 12.78 | W |
| 178 | -0.93 | 0.5093  | 1 | 50     | 37.343 | 0.5201 | 1.0272 | -0.92 | 12.96 | 12.78 | W |
| 225 | -0.93 | 0.6727  | 1 | 75     | 37.343 | 0.5201 | 0.573  | -0.92 | 12.96 | 12.78 | W |
| 13  | -1.01 | -0.3142 | 1 | 16.667 | 37.594 | 0.5178 | 1.3002 | -0.99 | 12.6  | 12.35 | W |
| 91  | -1.01 | 0.4547  | 1 | 33.333 | 37.594 | 0.5178 | 1.7536 | -0.99 | 12.6  | 12.35 | M |
| 104 | -1.01 | 0.5222  | 1 | 41.667 | 37.594 | 0.5178 | 0.9472 | -0.99 | 12.6  | 12.35 | M |
| 126 | -1.01 | 0.754   | 1 | 58.333 | 37.594 | 0.5178 | 0.7945 | -0.99 | 12.6  | 12.35 | M |
| 130 | -1.01 | 0.5168  | 1 | 58.333 | 37.594 | 0.5178 | 0.7654 | -0.99 | 12.6  | 12.35 | W |
| 105 | -1.08 | 0.3573  | 1 | 33.333 | 39.656 | 0.5146 | 1.197  | -1.07 | 12.24 | 11.9  | M |
| 123 | -1.08 | 0.1766  | 1 | 41.667 | 39.656 | 0.5146 | 0.8965 | -1.07 | 12.24 | 11.9  | M |
| 204 | -1.08 | 0.8892  | 1 | 41.667 | 39.656 | 0.5146 | 1.0397 | -1.07 | 12.24 | 11.9  | W |
| 101 | -1.12 | 0.0643  | 1 | 45.455 | 41.452 | 0.531  | 1.0247 | -1.1  | 10.86 | 10.5  | M |
| 2   | -1.16 | 0.5411  | 1 | 58.333 | 41.645 | 0.5105 | 0.7731 | -1.14 | 11.88 | 11.43 | M |
| 35  | -1.16 | 0.717   | 1 | 50     | 41.645 | 0.5105 | 0.631  | -1.14 | 11.88 | 11.43 | W |
| 47  | -1.16 | 0.8058  | 1 | 16.667 | 41.645 | 0.5105 | 1.2699 | -1.14 | 11.88 | 11.43 | M |
| 89  | -1.16 | -0.3553 | 1 | 25     | 41.645 | 0.5105 | 1.3156 | -1.14 | 11.88 | 11.43 | M |
| 106 | -1.16 | 0.3707  | 1 | 50     | 41.645 | 0.5105 | 0.9924 | -1.14 | 11.88 | 11.43 | M |
| 134 | -1.16 | 0.6892  | 1 | 16.667 | 41.645 | 0.5105 | 1.3604 | -1.14 | 11.88 | 11.43 | M |
| 174 | -1.16 | 0.2302  | 1 | 58.333 | 41.645 | 0.5105 | 0.9464 | -1.14 | 11.88 | 11.43 | M |
| 223 | -1.16 | 0.6135  | 1 | 58.333 | 41.645 | 0.5105 | 0.7407 | -1.14 | 11.88 | 11.43 | M |
| 4   | -1.25 | 0.062   | 1 | 41.667 | 43.688 | 0.5052 | 1.5574 | -1.22 | 11.53 | 10.96 | M |
| 15  | -1.25 | 0.6278  | 1 | 16.667 | 43.688 | 0.5052 | 1.0719 | -1.22 | 11.53 | 10.96 | W |
| 76  | -1.25 | 0.5329  | 1 | 83.333 | 43.688 | 0.5052 | 0.6729 | -1.22 | 11.53 | 10.96 | W |
| 147 | -1.25 | 0.2105  | 1 | 16.667 | 43.688 | 0.5052 | 1.3137 | -1.22 | 11.53 | 10.96 | W |
| 150 | -1.25 | 0.6822  | 1 | 41.667 | 43.688 | 0.5052 | 0.8465 | -1.22 | 11.53 | 10.96 | M |
| 10  | -1.33 | 0.6395  | 1 | 75     | 40.813 | 0.4987 | 0.5681 | -1.31 | 11.19 | 10.49 | M |
| 28  | -1.33 | 0.8939  | 1 | 16.667 | 40.813 | 0.4987 | 1.1983 | -1.31 | 11.19 | 10.49 | M |
| 29  | -1.33 | 0.4002  | 1 | 16.667 | 40.813 | 0.4987 | 1.4903 | -1.31 | 11.19 | 10.49 | M |
| 32  | -1.33 | 0.4505  | 1 | 41.667 | 40.813 | 0.4987 | 0.9983 | -1.31 | 11.19 | 10.49 | W |
| 42  | -1.33 | 0.4928  | 1 | 58.333 | 40.813 | 0.4987 | 0.5999 | -1.31 | 11.19 | 10.49 | M |
| 49  | -1.33 | 0.2657  | 1 | 66.667 | 40.813 | 0.4987 | 0.8002 | -1.31 | 11.19 | 10.49 | W |
| 53  | -1.33 | 0.8079  | 1 | 75     | 40.813 | 0.4987 | 0.3792 | -1.31 | 11.19 | 10.49 | M |
| 63  | -1.33 | 0.8076  | 1 | 66.667 | 40.813 | 0.4987 | 0.6129 | -1.31 | 11.19 | 10.49 | M |
| 84  | -1.33 | 0.8079  | 1 | 75     | 40.813 | 0.4987 | 0.3792 | -1.31 | 11.19 | 10.49 | M |
| 151 | -1.33 | 0.6661  | 1 | 8.3333 | 40.813 | 0.4987 | 1.1168 | -1.31 | 11.19 | 10.49 | W |



|     |       |         |   |        |        |        |        |       |       |       |   |
|-----|-------|---------|---|--------|--------|--------|--------|-------|-------|-------|---|
| 170 | -1.33 | 0.7595  | 1 | 8.3333 | 40.813 | 0.4987 | 1.8233 | -1.31 | 11.19 | 10.49 | M |
| 181 | -1.33 | 0.3961  | 1 | 8.3333 | 40.813 | 0.4987 | 1.5184 | -1.31 | 11.19 | 10.49 | M |
| 9   | -1.42 | 0.3485  | 1 | 25     | 40.899 | 0.4908 | 1.1846 | -1.4  | 10.85 | 10.04 | M |
| 55  | -1.42 | 0.5976  | 1 | 66.667 | 40.899 | 0.4908 | 0.5817 | -1.4  | 10.85 | 10.04 | M |
| 70  | -1.42 | 0.6607  | 1 | 66.667 | 40.899 | 0.4908 | 0.6163 | -1.4  | 10.85 | 10.04 | M |
| 77  | -1.42 | 0.6633  | 1 | 83.333 | 40.899 | 0.4908 | 0.4461 | -1.4  | 10.85 | 10.04 | M |
| 127 | -1.42 | -0.3158 | 1 | 58.333 | 40.899 | 0.4908 | 0.9209 | -1.4  | 10.85 | 10.04 | M |
| 175 | -1.42 | 0.6156  | 1 | 58.333 | 40.899 | 0.4908 | 0.8045 | -1.4  | 10.85 | 10.04 | M |
| 183 | -1.42 | 0.5381  | 1 | 83.333 | 40.899 | 0.4908 | 0.5513 | -1.4  | 10.85 | 10.04 | W |
| 33  | -1.52 | 0.6083  | 1 | 50     | 40.706 | 0.4814 | 0.7591 | -1.49 | 10.5  | 9.6   | W |
| 90  | -1.52 | 0.7355  | 1 | 50     | 40.706 | 0.4814 | 0.7893 | -1.49 | 10.5  | 9.6   | M |
| 99  | -1.52 | 0.0441  | 1 | 66.667 | 40.706 | 0.4814 | 0.7607 | -1.49 | 10.5  | 9.6   | W |
| 114 | -1.52 | 0.5235  | 1 | 75     | 40.706 | 0.4814 | 0.502  | -1.49 | 10.5  | 9.6   | M |
| 119 | -1.52 | 0.3057  | 1 | 0      | 40.706 | 0.4814 | 1.4747 | -1.49 | 10.5  | 9.6   | M |
| 152 | -1.52 | 0.3885  | 1 | 50     | 40.706 | 0.4814 | 0.864  | -1.49 | 10.5  | 9.6   | M |
| 165 | -1.52 | 0.5235  | 1 | 75     | 40.706 | 0.4814 | 0.502  | -1.49 | 10.5  | 9.6   | M |
| 182 | -1.52 | 0.2834  | 1 | 33.333 | 40.706 | 0.4814 | 1.1596 | -1.49 | 10.5  | 9.6   | M |
| 198 | -1.52 | 0.3165  | 1 | 50     | 40.706 | 0.4814 | 0.9076 | -1.49 | 10.5  | 9.6   | W |
| 214 | -1.52 | 0.8715  | 1 | 25     | 40.706 | 0.4814 | 0.967  | -1.49 | 10.5  | 9.6   | W |
| 16  | -1.62 | 0.6577  | 1 | 25     | 40.206 | 0.4704 | 0.9594 | -1.59 | 10.13 | 9.19  | W |
| 23  | -1.62 | 0.2797  | 1 | 25     | 40.206 | 0.4704 | 1.2439 | -1.59 | 10.13 | 9.19  | W |
| 36  | -1.62 | 0.3607  | 1 | 75     | 40.206 | 0.4704 | 0.6167 | -1.59 | 10.13 | 9.19  | M |
| 66  | -1.62 | 0.0489  | 1 | 33.333 | 40.206 | 0.4704 | 1.1378 | -1.59 | 10.13 | 9.19  | M |
| 109 | -1.62 | 0.5659  | 1 | 83.333 | 40.206 | 0.4704 | 0.3824 | -1.59 | 10.13 | 9.19  | W |
| 200 | -1.62 | 0.5632  | 1 | 66.667 | 40.206 | 0.4704 | 0.5295 | -1.59 | 10.13 | 9.19  | W |
| 12  | -1.72 | 0       | 1 | 75     | 43.237 | 0.4577 | 0.4569 | -1.69 | 9.72  | 8.81  | W |
| 25  | -1.72 | 0       | 1 | 75     | 43.237 | 0.4577 | 0.4569 | -1.69 | 9.72  | 8.81  | W |
| 40  | -1.72 | 0       | 1 | 75     | 43.237 | 0.4577 | 0.4569 | -1.69 | 9.72  | 8.81  | W |
| 57  | -1.72 | 0.5287  | 1 | 25     | 43.237 | 0.4577 | 0.755  | -1.69 | 9.72  | 8.81  | W |
| 60  | -1.72 | 0       | 1 | 75     | 43.237 | 0.4577 | 0.4569 | -1.69 | 9.72  | 8.81  | W |
| 64  | -1.72 | 0.7155  | 1 | 58.333 | 43.237 | 0.4577 | 0.6579 | -1.69 | 9.72  | 8.81  | M |
| 65  | -1.72 | 0       | 1 | 75     | 43.237 | 0.4577 | 0.4569 | -1.69 | 9.72  | 8.81  | W |
| 74  | -1.72 | 0.4419  | 1 | 16.667 | 43.237 | 0.4577 | 1.0497 | -1.69 | 9.72  | 8.81  | M |
| 79  | -1.72 | 0       | 1 | 75     | 43.237 | 0.4577 | 0.4569 | -1.69 | 9.72  | 8.81  | W |
| 96  | -1.72 | 0       | 1 | 75     | 43.237 | 0.4577 | 0.4569 | -1.69 | 9.72  | 8.81  | M |
| 102 | -1.72 | 0       | 1 | 75     | 43.237 | 0.4577 | 0.4569 | -1.69 | 9.72  | 8.81  | M |
| 121 | -1.72 | -0.1316 | 1 | 50     | 43.237 | 0.4577 | 0.8793 | -1.69 | 9.72  | 8.81  | W |
| 139 | -1.72 | 0.6568  | 1 | 66.667 | 43.237 | 0.4577 | 0.7773 | -1.69 | 9.72  | 8.81  | W |
| 192 | -1.72 | 0       | 1 | 75     | 43.237 | 0.4577 | 0.4569 | -1.69 | 9.72  | 8.81  | W |
| 193 | -1.72 | 0       | 1 | 75     | 43.237 | 0.4577 | 0.4569 | -1.69 | 9.72  | 8.81  | W |

|     |       |         |   |        |        |        |        |       |      |      |   |
|-----|-------|---------|---|--------|--------|--------|--------|-------|------|------|---|
| 34  | -1.84 | 0.71    | 1 | 41.667 | 42.745 | 0.4433 | 0.8071 | -1.8  | 9.26 | 8.45 | W |
| 108 | -1.84 | 0.8803  | 1 | 33.333 | 42.745 | 0.4433 | 0.7606 | -1.8  | 9.26 | 8.45 | W |
| 189 | -1.84 | 0.039   | 1 | 50     | 42.745 | 0.4433 | 0.6308 | -1.8  | 9.26 | 8.45 | M |
| 206 | -1.84 | 0.8607  | 1 | 25     | 42.745 | 0.4433 | 0.8609 | -1.8  | 9.26 | 8.45 | W |
| 7   | -1.96 | 0.0421  | 1 | 25     | 41.868 | 0.4271 | 1.0642 | -1.92 | 8.74 | 8.13 | W |
| 11  | -1.96 | 0.3127  | 1 | 8.3333 | 41.868 | 0.4271 | 1.3839 | -1.92 | 8.74 | 8.13 | W |
| 18  | -1.96 | 0.9304  | 1 | 41.667 | 41.868 | 0.4271 | 0.6435 | -1.92 | 8.74 | 8.13 | M |
| 83  | -1.96 | 0.4079  | 1 | 58.333 | 41.868 | 0.4271 | 0.6344 | -1.92 | 8.74 | 8.13 | W |
| 100 | -1.96 | 0.5789  | 1 | 41.667 | 41.868 | 0.4271 | 0.7455 | -1.92 | 8.74 | 8.13 | M |
| 135 | -1.96 | -0.2288 | 1 | 66.667 | 41.868 | 0.4271 | 0.6128 | -1.92 | 8.74 | 8.13 | M |
| 197 | -1.96 | 0.5468  | 1 | 58.333 | 41.868 | 0.4271 | 0.9054 | -1.92 | 8.74 | 8.13 | W |
| 211 | -1.96 | 0.6391  | 1 | 25     | 41.868 | 0.4271 | 1.184  | -1.92 | 8.74 | 8.13 | M |
| 30  | -2.03 | 0.288   | 1 | 54.545 | 43.169 | 0.3794 | 0.5556 | -1.97 | 7.26 | 7.02 | W |
| 124 | -2.09 | 0.6123  | 1 | 16.667 | 46.311 | 0.4092 | 0.933  | -2.04 | 8.17 | 7.82 | M |
| 37  | -2.24 | 0.8079  | 1 | 41.667 | 51.375 | 0.3896 | 1.2193 | -2.19 | 7.58 | 7.52 | M |
| 51  | -2.24 | 0.8079  | 1 | 41.667 | 51.375 | 0.3896 | 1.2193 | -2.19 | 7.58 | 7.52 | W |
| 54  | -2.24 | 0.9022  | 1 | 58.333 | 51.375 | 0.3896 | 0.8104 | -2.19 | 7.58 | 7.52 | M |
| 94  | -2.24 | 0.572   | 1 | 58.333 | 51.375 | 0.3896 | 0.495  | -2.19 | 7.58 | 7.52 | W |
| 164 | -2.24 | 0.6237  | 1 | 41.667 | 51.375 | 0.3896 | 0.4832 | -2.19 | 7.58 | 7.52 | M |
| 217 | -2.24 | 0.5969  | 1 | 66.667 | 51.375 | 0.3896 | 0.8044 | -2.19 | 7.58 | 7.52 | M |
| 22  | -2.41 | 0.8818  | 1 | 66.667 | 54.408 | 0.3684 | 0.7065 | -2.34 | 6.99 | 7.21 | M |
| 59  | -2.41 | 0.8703  | 1 | 66.667 | 54.408 | 0.3684 | 0.7059 | -2.34 | 6.99 | 7.21 | W |
| 162 | -2.41 | 0.451   | 1 | 50     | 54.408 | 0.3684 | 0.7746 | -2.34 | 6.99 | 7.21 | W |
| 222 | -2.41 | 0.6457  | 1 | 58.333 | 54.408 | 0.3684 | 0.9611 | -2.34 | 6.99 | 7.21 | M |
| 137 | -2.53 | 0.3052  | 1 | 54.545 | 57.899 | 0.3531 | 1.0965 | -2.46 | 6.13 | 6.45 | W |
| 14  | -2.6  | 0.0459  | 1 | 58.333 | 61.401 | 0.3455 | 1.1533 | -2.52 | 6.43 | 6.85 | W |
| 38  | -2.6  | 0.6395  | 1 | 75     | 61.401 | 0.3455 | 0.9796 | -2.52 | 6.43 | 6.85 | M |
| 62  | -2.6  | 0.6395  | 1 | 75     | 61.401 | 0.3455 | 0.9796 | -2.52 | 6.43 | 6.85 | W |
| 118 | -2.6  | 0.5235  | 1 | 75     | 61.401 | 0.3455 | 1.5364 | -2.52 | 6.43 | 6.85 | M |
| 149 | -2.6  | -0.0684 | 1 | 75     | 61.401 | 0.3455 | 0.9805 | -2.52 | 6.43 | 6.85 | M |
| 184 | -2.6  | 0.4226  | 1 | 50     | 61.401 | 0.3455 | 0.7933 | -2.52 | 6.43 | 6.85 | W |
| 185 | -2.6  | 0.7324  | 1 | 66.667 | 61.401 | 0.3455 | 0.7784 | -2.52 | 6.43 | 6.85 | M |
| 201 | -2.6  | 0.844   | 1 | 75     | 61.401 | 0.3455 | 0.4655 | -2.52 | 6.43 | 6.85 | W |
| 202 | -2.6  | 0.8622  | 1 | 75     | 61.401 | 0.3455 | 0.4552 | -2.52 | 6.43 | 6.85 | W |
| 218 | -2.6  | 0.2046  | 1 | 50     | 61.401 | 0.3455 | 0.7461 | -2.52 | 6.43 | 6.85 | M |
| 46  | -2.82 | 0.7801  | 1 | 91.667 | 64.787 | 0.3207 | 0.7053 | -2.73 | 5.92 | 6.38 | M |
| 81  | -2.82 | 0.497   | 1 | 66.667 | 64.787 | 0.3207 | 0.4491 | -2.73 | 5.92 | 6.38 | M |
| 155 | -2.82 | 0.6594  | 1 | 83.333 | 64.787 | 0.3207 | 0.9807 | -2.73 | 5.92 | 6.38 | M |
| 21  | -3.09 | 0.2419  | 1 | 66.667 | 69.787 | 0.2931 | 0.4646 | -2.98 | 5.43 | 5.71 | W |
| 24  | -3.09 | 0.2972  | 1 | 75     | 69.787 | 0.2931 | 0.7067 | -2.98 | 5.43 | 5.71 | W |

|     |       |         |   |        |        |        |        |       |      |      |   |
|-----|-------|---------|---|--------|--------|--------|--------|-------|------|------|---|
| 41  | -3.09 | 0.6395  | 1 | 75     | 69.787 | 0.2931 | 0.6502 | -2.98 | 5.43 | 5.71 | W |
| 88  | -3.09 | 0.6948  | 1 | 91.667 | 69.787 | 0.2931 | 0.7332 | -2.98 | 5.43 | 5.71 | W |
| 93  | -3.09 | 0.4669  | 1 | 66.667 | 69.787 | 0.2931 | 0.5681 | -2.98 | 5.43 | 5.71 | W |
| 110 | -3.09 | 0.5659  | 1 | 83.333 | 69.787 | 0.2931 | 1.0091 | -2.98 | 5.43 | 5.71 | W |
| 128 | -3.09 | 0.5419  | 1 | 66.667 | 69.787 | 0.2931 | 0.4178 | -2.98 | 5.43 | 5.71 | M |
| 144 | -3.09 | 0.5235  | 1 | 83.333 | 69.787 | 0.2931 | 1.0218 | -2.98 | 5.43 | 5.71 | W |
| 156 | -3.09 | 0.2921  | 1 | 66.667 | 69.787 | 0.2931 | 0.5839 | -2.98 | 5.43 | 5.71 | W |
| 179 | -3.09 | 0.4191  | 1 | 66.667 | 69.787 | 0.2931 | 0.435  | -2.98 | 5.43 | 5.71 | M |
| 220 | -3.09 | 0.6485  | 1 | 75     | 69.787 | 0.2931 | 0.7442 | -2.98 | 5.43 | 5.71 | M |
| 17  | -3.43 | 0.5659  | 1 | 91.667 | 75.462 | 0.2612 | 0.7545 | -3.28 | 4.82 | 4.73 | M |
| 20  | -3.43 | 0.5659  | 1 | 91.667 | 75.462 | 0.2612 | 0.7545 | -3.28 | 4.82 | 4.73 | W |
| 27  | -3.43 | 0.5263  | 1 | 83.333 | 75.462 | 0.2612 | 0.3846 | -3.28 | 4.82 | 4.73 | M |
| 52  | -3.43 | 0.5235  | 1 | 83.333 | 75.462 | 0.2612 | 0.7644 | -3.28 | 4.82 | 4.73 | W |
| 82  | -3.43 | 0.6633  | 1 | 83.333 | 75.462 | 0.2612 | 0.5135 | -3.28 | 4.82 | 4.73 | M |
| 86  | -3.43 | 0.6712  | 1 | 83.333 | 75.462 | 0.2612 | 0.3539 | -3.28 | 4.82 | 4.73 | W |
| 97  | -3.43 | 0.6633  | 1 | 83.333 | 75.462 | 0.2612 | 0.5135 | -3.28 | 4.82 | 4.73 | M |
| 113 | -3.43 | 0.5659  | 1 | 91.667 | 75.462 | 0.2612 | 0.7545 | -3.28 | 4.82 | 4.73 | M |
| 115 | -3.43 | 0.2287  | 1 | 66.667 | 75.462 | 0.2612 | 0.4369 | -3.28 | 4.82 | 4.73 | M |
| 129 | -3.43 | -0.1652 | 1 | 83.333 | 75.462 | 0.2612 | 0.8611 | -3.28 | 4.82 | 4.73 | M |
| 143 | -3.43 | -0.0311 | 1 | 75     | 75.462 | 0.2612 | 0.6164 | -3.28 | 4.82 | 4.73 | M |
| 168 | -3.43 | 0.1728  | 1 | 83.333 | 75.462 | 0.2612 | 0.4262 | -3.28 | 4.82 | 4.73 | M |
| 186 | -3.43 | 0.6633  | 1 | 83.333 | 75.462 | 0.2612 | 0.5135 | -3.28 | 4.82 | 4.73 | W |
| 194 | -3.43 | 0.5659  | 1 | 91.667 | 75.462 | 0.2612 | 0.7545 | -3.28 | 4.82 | 4.73 | M |
| 216 | -3.43 | 0.2964  | 1 | 83.333 | 75.462 | 0.2612 | 0.8077 | -3.28 | 4.82 | 4.73 | W |
| 219 | -3.43 | 0.5235  | 1 | 83.333 | 75.462 | 0.2612 | 0.7644 | -3.28 | 4.82 | 4.73 | M |
| 6   | -3.68 | 0.8377  | 1 | 81.818 | 82.645 | 0.2028 | 0.3118 | -3.45 | 3.79 | 3.52 | M |
| 87  | -3.9  | 0.5235  | 1 | 91.667 | 84.055 | 0.2209 | 0.5077 | -3.67 | 3.81 | 3.35 | W |
| 167 | -3.9  | 0.3917  | 1 | 83.333 | 84.055 | 0.2209 | 0.3461 | -3.67 | 3.81 | 3.35 | M |
| 190 | -3.9  | 0.6395  | 1 | 83.333 | 84.055 | 0.2209 | 0.3219 | -3.67 | 3.81 | 3.35 | M |
| 208 | -3.9  | 0.5659  | 1 | 91.667 | 84.055 | 0.2209 | 0.5006 | -3.67 | 3.81 | 3.35 | M |
| 209 | -3.9  | 0.8079  | 1 | 83.333 | 84.055 | 0.2209 | 0.2958 | -3.67 | 3.81 | 3.35 | M |
| 213 | -3.9  | 0.6395  | 1 | 83.333 | 84.055 | 0.2209 | 0.3219 | -3.67 | 3.81 | 3.35 | W |
| 31  | -4.66 | 0.2964  | 1 | 91.667 | 91.811 | 0.1629 | 0.2694 | -4.19 | 2.12 | 1.66 | W |
| 72  | -4.66 | 0.5659  | 1 | 91.667 | 91.811 | 0.1629 | 0.2486 | -4.19 | 2.12 | 1.66 | W |
| 73  | -4.66 | 0.5659  | 1 | 91.667 | 91.811 | 0.1629 | 0.2486 | -4.19 | 2.12 | 1.66 | M |
| 75  | -4.66 | 0.5659  | 1 | 91.667 | 91.811 | 0.1629 | 0.2486 | -4.19 | 2.12 | 1.66 | W |
| 98  | -4.66 | 0.5659  | 1 | 91.667 | 91.811 | 0.1629 | 0.2486 | -4.19 | 2.12 | 1.66 | W |
| 103 | -4.66 | 0.5659  | 1 | 91.667 | 91.811 | 0.1629 | 0.2486 | -4.19 | 2.12 | 1.66 | W |
| 111 | -4.66 | 0.5659  | 1 | 91.667 | 91.811 | 0.1629 | 0.2486 | -4.19 | 2.12 | 1.66 | M |
| 142 | -4.66 | 0.5659  | 1 | 91.667 | 91.811 | 0.1629 | 0.2486 | -4.19 | 2.12 | 1.66 | M |

|     |       |        |   |        |        |        |        |       |      |      |   |
|-----|-------|--------|---|--------|--------|--------|--------|-------|------|------|---|
| 210 | -4.66 | 0.5659 | 1 | 91.667 | 91.811 | 0.1629 | 0.2486 | -4.19 | 2.12 | 1.66 | M |
| 226 | -4.66 | 0.2964 | 1 | 91.667 | 91.811 | 0.1629 | 0.2694 | -4.19 | 2.12 | 1.66 | W |
| 5   | -5.91 | 0      | 1 | 100    | 100    | 0      | 0      | -5.91 | 0    | 0    | M |
| 8   | -5.91 | 0      | 1 | 100    | 100    | 0      | 0      | -5.91 | 0    | 0    | M |
| 19  | -5.91 | 0      | 1 | 100    | 100    | 0      | 0      | -5.91 | 0    | 0    | W |
| 39  | -5.91 | 0      | 1 | 100    | 100    | 0      | 0      | -5.91 | 0    | 0    | W |
| 43  | -5.91 | 0      | 1 | 100    | 100    | 0      | 0      | -5.91 | 0    | 0    | W |
| 44  | -5.91 | 0      | 1 | 100    | 100    | 0      | 0      | -5.91 | 0    | 0    | M |
| 58  | -5.91 | 0      | 1 | 100    | 100    | 0      | 0      | -5.91 | 0    | 0    | W |
| 71  | -5.91 | 0      | 1 | 100    | 100    | 0      | 0      | -5.91 | 0    | 0    | M |
| 95  | -5.91 | 0      | 1 | 100    | 100    | 0      | 0      | -5.91 | 0    | 0    | M |
| 131 | -5.91 | 0      | 1 | 100    | 100    | 0      | 0      | -5.91 | 0    | 0    | M |
| 136 | -5.91 | 0      | 1 | 100    | 100    | 0      | 0      | -5.91 | 0    | 0    | W |
| 166 | -5.91 | 0      | 1 | 100    | 100    | 0      | 0      | -5.91 | 0    | 0    | W |
| 173 | -5.91 | 0      | 1 | 100    | 100    | 0      | 0      | -5.91 | 0    | 0    | W |
| 199 | -5.91 | 0      | 1 | 100    | 100    | 0      | 0      | -5.91 | 0    | 0    | W |
| 205 | -5.91 | 0      | 1 | 100    | 100    | 0      | 0      | -5.91 | 0    | 0    | W |
| 212 | -5.91 | 0      | 1 | 100    | 100    | 0      | 0      | -5.91 | 0    | 0    | W |
| 215 | -5.91 | 0      | 1 | 100    | 100    | 0      | 0      | -5.91 | 0    | 0    | M |
| 221 | -5.91 | 0      | 1 | 100    | 100    | 0      | 0      | -5.91 | 0    | 0    | M |
| 224 | -5.91 | 0      | 1 | 100    | 100    | 0      | 0      | -5.91 | 0    | 0    | M |
