# Supplementary material for: Reliability, Validity, and Unidimensionality of the Korean Version of the Pornography Craving Questionnaire Based on the Classical Test Theory and Item Response Theory
Source: PubMed Central journal article supplement — Psychiatry Investig. 2021 Jun 17;18(6):530–8. doi: 10.30773/pi.2020.0401 (PMC8256136; doi:10.30773/pi.2020.0401), 2021-06-17
Supplement: pi-2020-0401-suppl5.pdf [file pi-2020-0401-suppl5.pdf]

|             |           |           |           |           |           |           |           |           |           |           |           |           |
|-------------|-----------|-----------|-----------|-----------|-----------|-----------|-----------|-----------|-----------|-----------|-----------|-----------|
| Item Number | 1         | 2         | 3         | 4         | 5         | 6         | 7         | 8         | 9         | 10        | 11        | 12        |
| Name        | I000<br>1 | I000<br>2 | I000<br>3 | I000<br>4 | I000<br>5 | I000<br>6 | I000<br>7 | I000<br>8 | I000<br>9 | I001<br>0 | I001<br>1 | I001<br>2 |

Width of Mantel slice: MHSlice = .010 logits, Zero cell adjustment: MHZERO = .0000
