# Supplementary material for: Reliability, Validity, and Unidimensionality of the Korean Version of the Pornography Craving Questionnaire Based on the Classical Test Theory and Item Response Theory
Source: PubMed Central journal article supplement — Psychiatry Investig. 2021 Jun 17;18(6):530–8. doi: 10.30773/pi.2020.0401 (PMC8256136; doi:10.30773/pi.2020.0401), 2021-06-17
Supplement: pi-2020-0401-suppl6.pdf [file pi-2020-0401-suppl6.pdf]

Supplementary Table 6. SSCPARAM file input for Poly-DIMTEST.

asndata=pcq.dat

asnskip=0

asnsubs=226

asnindx=1

testlen=12

baddata=0

difchck=N

asntalk=2

asnmsgs=asnmsgs\_pcq

cellmin=1

ssctalk=3

sscmsgs=sscmsgs\_pcq

asnlist=asnlist

at1size=4

dclevel=.02

at1inpt=1

sscddata=pcq.dat

sscskip=0

sscsubs=226

category

7 7 7 7 7 7 7 7 7 7 7 7
