# Supplementary material for: Reliability, Validity, and Unidimensionality of the Korean Version of the Pornography Craving Questionnaire Based on the Classical Test Theory and Item Response Theory
Source: PubMed Central journal article supplement — Psychiatry Investig. 2021 Jun 17;18(6):530–8. doi: 10.30773/pi.2020.0401 (PMC8256136; doi:10.30773/pi.2020.0401), 2021-06-17
Supplement: pi-2020-0401-suppl7.pdf [file pi-2020-0401-suppl7.pdf]

Supplementary Table 7. The result of Poly-DIMTEST statistic report.

Poly-DIMTEST Statistic Report

=====

Test length: 12

# of Examinees in Poly-DIMTEST Stat. Calculation Group: 226

This represents a \*small\* test administration:

up to 2000 examinees.

Minimum # of persons required for each cell: 1

AT1 item list    AT2 item list

-----

|   |    |
|---|----|
| 1 | 11 |
| 2 | 5  |
| 3 | 10 |

4

6

PT item list

-----

7

8

9

12

Calculation summary

-----

AT lengths:  $m = 4$

PT length:  $n = 4$

Number of partition cells:  $K = 17$

ASSESSMENT TEST 1

$\Sigma K2$  : Formula in page 7. (Li & Stout, 1995)

$\Sigma UK2$  : Formula in page 7. (Li & Stout, 1995)

$Vk2$  : Formula in page 8. (Li & Stout, 1995)

$$X_k = \text{SigmaK2} - \text{SigmaUK2}$$

PT Cell PT Avg AT1 Avg SigmaK2 SigmaUK2 sqrt(Vk2)

=====

|      |       |       |       |       |       |                    |
|------|-------|-------|-------|-------|-------|--------------------|
| * 1  | 0.125 | 0.292 | 0.000 | 0.000 | 0.000 | kick this cell out |
| 2    | 0.167 | 0.281 | 0.016 | 0.007 | 0.004 |                    |
| 3    | 0.208 | 0.458 | 0.024 | 0.016 | 0.008 |                    |
| 4    | 0.250 | 0.354 | 0.011 | 0.007 | 0.008 |                    |
| 5    | 0.292 | 0.404 | 0.012 | 0.007 | 0.005 |                    |
| 6    | 0.333 | 0.413 | 0.024 | 0.009 | 0.014 |                    |
| 7    | 0.375 | 0.542 | 0.002 | 0.005 | 0.002 |                    |
| 8    | 0.417 | 0.507 | 0.027 | 0.009 | 0.012 |                    |
| 9    | 0.458 | 0.549 | 0.016 | 0.009 | 0.007 |                    |
| 10   | 0.500 | 0.566 | 0.014 | 0.006 | 0.007 |                    |
| 11   | 0.542 | 0.625 | 0.008 | 0.003 | 0.003 |                    |
| 12   | 0.583 | 0.639 | 0.020 | 0.010 | 0.007 |                    |
| * 13 | 0.625 | 0.667 | 0.000 | 0.000 | 0.000 | kick this cell out |
| * 14 | 0.667 | 0.646 | 0.000 | 0.000 | 0.000 | kick this cell out |
| 15   | 0.750 | 0.740 | 0.006 | 0.006 | 0.004 |                    |
| 16   | 0.833 | 0.833 | 0.000 | 0.000 | 0.000 |                    |
| * 17 | 0.875 | 1.083 | 0.000 | 0.000 | 0.000 | kick this cell out |

-----

Sum: 0.181 0.096 0.081

$$\text{Max}(\sqrt{V_k^2})/\text{Min}(\sqrt{V_k^2}) = 0.014 / 0.000 = 43.8363$$

ASSESSMENT TEST 2

SigmaK2 : Formula in page 7. (Li & Stout, 1995)

SigmaUK2 : Formula in page 7. (Li & Stout, 1995)

Vk2 : Formula in page 8. (Li & Stout, 1995)

$$X_k = \text{SigmaK2} - \text{SigmaUK2}$$

PT Cell PT Avg AT2 Avg SigmaK2 SigmaUK2 sqrt(Vk2)

=====

|   |    |       |       |       |       |                         |
|---|----|-------|-------|-------|-------|-------------------------|
| * | 1  | 0.125 | 0.292 | 0.000 | 0.000 | 0.000kick this cell out |
|   | 2  | 0.167 | 0.237 | 0.011 | 0.007 | 0.003                   |
|   | 3  | 0.208 | 0.385 | 0.016 | 0.013 | 0.008                   |
|   | 4  | 0.250 | 0.384 | 0.026 | 0.012 | 0.006                   |
|   | 5  | 0.292 | 0.388 | 0.013 | 0.008 | 0.005                   |
|   | 6  | 0.333 | 0.386 | 0.008 | 0.006 | 0.003                   |
|   | 7  | 0.375 | 0.403 | 0.007 | 0.004 | 0.004                   |
|   | 8  | 0.417 | 0.472 | 0.013 | 0.011 | 0.007                   |
|   | 9  | 0.458 | 0.479 | 0.020 | 0.014 | 0.010                   |
|   | 10 | 0.500 | 0.545 | 0.020 | 0.010 | 0.008                   |

|      |       |       |       |       |                         |
|------|-------|-------|-------|-------|-------------------------|
| 11   | 0.542 | 0.556 | 0.006 | 0.005 | 0.003                   |
| 12   | 0.583 | 0.644 | 0.007 | 0.009 | 0.004                   |
| 13   | 0.625 | 0.708 | 0.000 | 0.000 | 0.000                   |
| * 14 | 0.667 | 0.646 | 0.000 | 0.000 | 0.000kick this cell out |
| 15   | 0.750 | 0.677 | 0.005 | 0.008 | 0.005                   |
| * 16 | 0.833 | 0.792 | 0.000 | 0.000 | 0.000kick this cell out |
| 17   | 0.875 | 1.042 | 0.000 | 0.000 | 0.001                   |
|      |       |       | ----- |       |                         |
|      | Sum:  |       | 0.150 | 0.107 | 0.069                   |

$$\text{Max}(\sqrt{V_{k2}})/\text{Min}(\sqrt{V_{k2}}) = 0.010 / 0.000 = 58.9042$$

Table of Intermediate Values for Poly-DIMTEST Statistic T

| PT Cell    | PT Score | # Examinees | TL,k    | TB,k    | TL,k - TB,k |
|------------|----------|-------------|---------|---------|-------------|
| =====      |          |             |         |         |             |
| =====      |          |             |         |         |             |
| * kick out |          |             |         |         |             |
| 2          | 4        | 90          | 2.00318 | 1.11599 | 0.88719     |
| 3          | 5        | 13          | 0.98183 | 0.27538 | 0.70645     |
| 4          | 6        | 14          | 0.42317 | 2.35886 | -1.93569    |

|            |      |     |          |          |          |
|------------|------|-----|----------|----------|----------|
| 5          | 7    | 16  | 0.79363  | 0.82795  | -0.03432 |
| 6          | 8    | 38  | 1.10783  | 0.76632  | 0.34152  |
| 7          | 9    | 6   | -1.79301 | 0.69221  | -2.48523 |
| 8          | 10   | 6   | 1.51096  | 0.25111  | 1.25984  |
| 9          | 11   | 6   | 1.08150  | 0.61060  | 0.47090  |
| 10         | 12   | 12  | 1.21575  | 1.14352  | 0.07223  |
| 11         | 13   | 3   | 1.35827  | 0.55085  | 0.80743  |
| 12         | 14   | 9   | 1.47144  | -0.59159 | 2.06303  |
| 13         | 15   | 1   | 0.00000  | 0.00012  | -0.00012 |
| * kick out |      |     |          |          |          |
| 15         | 18   | 4   | 0.10674  | -0.64457 | 0.75131  |
| * kick out |      |     |          |          |          |
| 17         | 21   | 1   | 0.00000  | 0.00007  | -0.00007 |
|            |      |     | -----    |          |          |
|            | Sum: | 219 | 10.2613  | 7.3568   | 2.9045   |

$TL_k = X_k / \sqrt{Vk^2}$  (using AT1 sigma's),

$TB_k = X_k / \sqrt{Vk^2}$  (using AT2 sigma's).

Original examinee Poly-DIMTEST statistic group size: 226

Size after deleting sparse cells: 219

Proportion of examinees included in  
calculating the Poly-DIMTEST statistics: .9690

\*\*\*\*\*

### Poly-DIMTEST Summary and Results

\*\*\*\*\*

$$TL = \sum \{ X_k / \sqrt{V_k^2} \} / \sqrt{K} \text{ (using AT1)}$$

$$TB = \sum \{ X_k / \sqrt{V_k^2} \} / \sqrt{K} \text{ (using AT2)}$$

### Poly-Dimtest Statistics

=====

| TL | TB | T | P-value |
|----|----|---|---------|
|----|----|---|---------|

=====

=====

|          |          |          |          |
|----------|----------|----------|----------|
| 2.845981 | 1.966195 | 0.622102 | 0.266937 |
|----------|----------|----------|----------|
