# Supplementary material for: Reliability, Validity, and Unidimensionality of the Korean Version of the Pornography Craving Questionnaire Based on the Classical Test Theory and Item Response Theory
Source: PubMed Central journal article supplement — Psychiatry Investig. 2021 Jun 17;18(6):530–8. doi: 10.30773/pi.2020.0401 (PMC8256136; doi:10.30773/pi.2020.0401), 2021-06-17
Supplement: pi-2020-0401-suppl8.pdf [file pi-2020-0401-suppl8.pdf]

Supplementary Table 8. Test information function according to the measure on a latent variable which shows the highest information,16.0584 at a measure of -0.098.

| Test Information Function C2 |        |        |
|------------------------------|--------|--------|
| R1                           | -7     | 0.1021 |
| R2                           | -6.993 | 0.1028 |
| R3                           | -6.986 | 0.1035 |
| R4                           | -6.979 | 0.1043 |
| R5                           | -6.972 | 0.105  |
| R6                           | -6.965 | 0.1057 |
| R7                           | -6.958 | 0.1064 |
| R8                           | -6.951 | 0.1072 |
| R9                           | -6.944 | 0.1079 |
| R10                          | -6.937 | 0.1087 |
| R11                          | -6.93  | 0.1094 |
| R12                          | -6.923 | 0.1102 |
| R13                          | -6.916 | 0.1109 |
| R14                          | -6.909 | 0.1117 |
| R15                          | -6.902 | 0.1125 |
| R16                          | -6.895 | 0.1132 |
| R17                          | -6.888 | 0.114  |
| R18                          | -6.881 | 0.1148 |
| R19                          | -6.874 | 0.1156 |
| R20                          | -6.867 | 0.1164 |
| R21                          | -6.86  | 0.1172 |
| R22                          | -6.853 | 0.118  |

|     |        |        |
|-----|--------|--------|
| R23 | -6.846 | 0.1188 |
| R24 | -6.839 | 0.1196 |
| R25 | -6.832 | 0.1205 |
| R26 | -6.825 | 0.1213 |
| R27 | -6.818 | 0.1221 |
| R28 | -6.811 | 0.123  |
| R29 | -6.804 | 0.1238 |
| R30 | -6.797 | 0.1247 |
| R31 | -6.79  | 0.1255 |
| R32 | -6.783 | 0.1264 |
| R33 | -6.776 | 0.1273 |
| R34 | -6.769 | 0.1282 |
| R35 | -6.762 | 0.129  |
| R36 | -6.755 | 0.1299 |
| R37 | -6.748 | 0.1308 |
| R38 | -6.741 | 0.1317 |
| R39 | -6.734 | 0.1326 |
| R40 | -6.727 | 0.1336 |
| R41 | -6.72  | 0.1345 |
| R42 | -6.713 | 0.1354 |
| R43 | -6.706 | 0.1363 |
| R44 | -6.699 | 0.1373 |
| R45 | -6.692 | 0.1382 |
| R46 | -6.685 | 0.1392 |
| R47 | -6.678 | 0.1401 |
| R48 | -6.671 | 0.1411 |

|     |        |        |
|-----|--------|--------|
| R49 | -6.664 | 0.1421 |
| R50 | -6.657 | 0.143  |
| R51 | -6.65  | 0.144  |
| R52 | -6.643 | 0.145  |
| R53 | -6.636 | 0.146  |
| R54 | -6.629 | 0.147  |
| R55 | -6.622 | 0.148  |
| R56 | -6.615 | 0.149  |
| R57 | -6.608 | 0.1501 |
| R58 | -6.601 | 0.1511 |
| R59 | -6.594 | 0.1521 |
| R60 | -6.587 | 0.1532 |
| R61 | -6.58  | 0.1542 |
| R62 | -6.573 | 0.1553 |
| R63 | -6.566 | 0.1564 |
| R64 | -6.559 | 0.1574 |
| R65 | -6.552 | 0.1585 |
| R66 | -6.545 | 0.1596 |
| R67 | -6.538 | 0.1607 |
| R68 | -6.531 | 0.1618 |
| R69 | -6.524 | 0.1629 |
| R70 | -6.517 | 0.164  |
| R71 | -6.51  | 0.1651 |
| R72 | -6.503 | 0.1663 |
| R73 | -6.496 | 0.1674 |
| R74 | -6.489 | 0.1686 |

|      |        |        |
|------|--------|--------|
| R75  | -6.482 | 0.1697 |
| R76  | -6.475 | 0.1709 |
| R77  | -6.468 | 0.172  |
| R78  | -6.461 | 0.1732 |
| R79  | -6.454 | 0.1744 |
| R80  | -6.447 | 0.1756 |
| R81  | -6.44  | 0.1768 |
| R82  | -6.433 | 0.178  |
| R83  | -6.426 | 0.1792 |
| R84  | -6.419 | 0.1805 |
| R85  | -6.412 | 0.1817 |
| R86  | -6.405 | 0.1829 |
| R87  | -6.398 | 0.1842 |
| R88  | -6.391 | 0.1854 |
| R89  | -6.384 | 0.1867 |
| R90  | -6.377 | 0.188  |
| R91  | -6.37  | 0.1893 |
| R92  | -6.363 | 0.1906 |
| R93  | -6.356 | 0.1919 |
| R94  | -6.349 | 0.1932 |
| R95  | -6.342 | 0.1945 |
| R96  | -6.335 | 0.1958 |
| R97  | -6.328 | 0.1972 |
| R98  | -6.321 | 0.1985 |
| R99  | -6.314 | 0.1999 |
| R100 | -6.307 | 0.2012 |

|      |        |        |
|------|--------|--------|
| R101 | -6.3   | 0.2026 |
| R102 | -6.293 | 0.204  |
| R103 | -6.286 | 0.2054 |
| R104 | -6.279 | 0.2068 |
| R105 | -6.272 | 0.2082 |
| R106 | -6.265 | 0.2096 |
| R107 | -6.258 | 0.211  |
| R108 | -6.251 | 0.2125 |
| R109 | -6.244 | 0.2139 |
| R110 | -6.237 | 0.2154 |
| R111 | -6.23  | 0.2168 |
| R112 | -6.223 | 0.2183 |
| R113 | -6.216 | 0.2198 |
| R114 | -6.209 | 0.2213 |
| R115 | -6.202 | 0.2228 |
| R116 | -6.195 | 0.2243 |
| R117 | -6.188 | 0.2258 |
| R118 | -6.181 | 0.2274 |
| R119 | -6.174 | 0.2289 |
| R120 | -6.167 | 0.2305 |
| R121 | -6.16  | 0.232  |
| R122 | -6.153 | 0.2336 |
| R123 | -6.146 | 0.2352 |
| R124 | -6.139 | 0.2368 |
| R125 | -6.132 | 0.2384 |
| R126 | -6.125 | 0.24   |

|      |        |        |
|------|--------|--------|
| R127 | -6.118 | 0.2416 |
| R128 | -6.111 | 0.2433 |
| R129 | -6.104 | 0.2449 |
| R130 | -6.097 | 0.2466 |
| R131 | -6.09  | 0.2482 |
| R132 | -6.083 | 0.2499 |
| R133 | -6.076 | 0.2516 |
| R134 | -6.069 | 0.2533 |
| R135 | -6.062 | 0.255  |
| R136 | -6.055 | 0.2568 |
| R137 | -6.048 | 0.2585 |
| R138 | -6.041 | 0.2603 |
| R139 | -6.034 | 0.262  |
| R140 | -6.027 | 0.2638 |
| R141 | -6.02  | 0.2656 |
| R142 | -6.013 | 0.2674 |
| R143 | -6.006 | 0.2692 |
| R144 | -5.999 | 0.271  |
| R145 | -5.992 | 0.2728 |
| R146 | -5.985 | 0.2747 |
| R147 | -5.978 | 0.2765 |
| R148 | -5.971 | 0.2784 |
| R149 | -5.964 | 0.2802 |
| R150 | -5.957 | 0.2821 |
| R151 | -5.95  | 0.284  |
| R152 | -5.943 | 0.286  |

|      |        |        |
|------|--------|--------|
| R153 | -5.936 | 0.2879 |
| R154 | -5.929 | 0.2898 |
| R155 | -5.922 | 0.2918 |
| R156 | -5.915 | 0.2937 |
| R157 | -5.908 | 0.2957 |
| R158 | -5.901 | 0.2977 |
| R159 | -5.894 | 0.2997 |
| R160 | -5.887 | 0.3017 |
| R161 | -5.88  | 0.3037 |
| R162 | -5.873 | 0.3058 |
| R163 | -5.866 | 0.3078 |
| R164 | -5.859 | 0.3099 |
| R165 | -5.852 | 0.312  |
| R166 | -5.845 | 0.3141 |
| R167 | -5.838 | 0.3162 |
| R168 | -5.831 | 0.3183 |
| R169 | -5.824 | 0.3204 |
| R170 | -5.817 | 0.3226 |
| R171 | -5.81  | 0.3247 |
| R172 | -5.803 | 0.3269 |
| R173 | -5.796 | 0.3291 |
| R174 | -5.789 | 0.3313 |
| R175 | -5.782 | 0.3335 |
| R176 | -5.775 | 0.3358 |
| R177 | -5.768 | 0.338  |
| R178 | -5.761 | 0.3403 |

|      |        |        |
|------|--------|--------|
| R179 | -5.754 | 0.3425 |
| R180 | -5.747 | 0.3448 |
| R181 | -5.74  | 0.3471 |
| R182 | -5.733 | 0.3495 |
| R183 | -5.726 | 0.3518 |
| R184 | -5.719 | 0.3541 |
| R185 | -5.712 | 0.3565 |
| R186 | -5.705 | 0.3589 |
| R187 | -5.698 | 0.3613 |
| R188 | -5.691 | 0.3637 |
| R189 | -5.684 | 0.3661 |
| R190 | -5.677 | 0.3685 |
| R191 | -5.67  | 0.371  |
| R192 | -5.663 | 0.3735 |
| R193 | -5.656 | 0.3759 |
| R194 | -5.649 | 0.3784 |
| R195 | -5.642 | 0.381  |
| R196 | -5.635 | 0.3835 |
| R197 | -5.628 | 0.386  |
| R198 | -5.621 | 0.3886 |
| R199 | -5.614 | 0.3912 |
| R200 | -5.607 | 0.3938 |
| R201 | -5.6   | 0.3964 |
| R202 | -5.593 | 0.399  |
| R203 | -5.586 | 0.4017 |
| R204 | -5.579 | 0.4043 |



|      |        |        |
|------|--------|--------|
| R205 | -5.572 | 0.407  |
| R206 | -5.565 | 0.4097 |
| R207 | -5.558 | 0.4124 |
| R208 | -5.551 | 0.4151 |
| R209 | -5.544 | 0.4179 |
| R210 | -5.537 | 0.4206 |
| R211 | -5.53  | 0.4234 |
| R212 | -5.523 | 0.4262 |
| R213 | -5.516 | 0.429  |
| R214 | -5.509 | 0.4319 |
| R215 | -5.502 | 0.4347 |
| R216 | -5.495 | 0.4376 |
| R217 | -5.488 | 0.4405 |
| R218 | -5.481 | 0.4434 |
| R219 | -5.474 | 0.4463 |
| R220 | -5.467 | 0.4492 |
| R221 | -5.46  | 0.4522 |
| R222 | -5.453 | 0.4552 |
| R223 | -5.446 | 0.4582 |
| R224 | -5.439 | 0.4612 |
| R225 | -5.432 | 0.4642 |
| R226 | -5.425 | 0.4673 |
| R227 | -5.418 | 0.4703 |
| R228 | -5.411 | 0.4734 |
| R229 | -5.404 | 0.4765 |
| R230 | -5.397 | 0.4796 |

|      |        |        |
|------|--------|--------|
| R231 | -5.39  | 0.4828 |
| R232 | -5.383 | 0.4859 |
| R233 | -5.376 | 0.4891 |
| R234 | -5.369 | 0.4923 |
| R235 | -5.362 | 0.4956 |
| R236 | -5.355 | 0.4988 |
| R237 | -5.348 | 0.5021 |
| R238 | -5.341 | 0.5053 |
| R239 | -5.334 | 0.5086 |
| R240 | -5.327 | 0.512  |
| R241 | -5.32  | 0.5153 |
| R242 | -5.313 | 0.5187 |
| R243 | -5.306 | 0.522  |
| R244 | -5.299 | 0.5254 |
| R245 | -5.292 | 0.5289 |
| R246 | -5.285 | 0.5323 |
| R247 | -5.278 | 0.5358 |
| R248 | -5.271 | 0.5393 |
| R249 | -5.264 | 0.5428 |
| R250 | -5.257 | 0.5463 |
| R251 | -5.25  | 0.5498 |
| R252 | -5.243 | 0.5534 |
| R253 | -5.236 | 0.557  |
| R254 | -5.229 | 0.5606 |
| R255 | -5.222 | 0.5643 |
| R256 | -5.215 | 0.5679 |

|      |        |        |
|------|--------|--------|
| R257 | -5.208 | 0.5716 |
| R258 | -5.201 | 0.5753 |
| R259 | -5.194 | 0.579  |
| R260 | -5.187 | 0.5828 |
| R261 | -5.18  | 0.5865 |
| R262 | -5.173 | 0.5903 |
| R263 | -5.166 | 0.5941 |
| R264 | -5.159 | 0.598  |
| R265 | -5.152 | 0.6018 |
| R266 | -5.145 | 0.6057 |
| R267 | -5.138 | 0.6096 |
| R268 | -5.131 | 0.6135 |
| R269 | -5.124 | 0.6175 |
| R270 | -5.117 | 0.6214 |
| R271 | -5.11  | 0.6254 |
| R272 | -5.103 | 0.6295 |
| R273 | -5.096 | 0.6335 |
| R274 | -5.089 | 0.6376 |
| R275 | -5.082 | 0.6417 |
| R276 | -5.075 | 0.6458 |
| R277 | -5.068 | 0.6499 |
| R278 | -5.061 | 0.6541 |
| R279 | -5.054 | 0.6583 |
| R280 | -5.047 | 0.6625 |
| R281 | -5.04  | 0.6667 |
| R282 | -5.033 | 0.671  |

|      |        |        |
|------|--------|--------|
| R283 | -5.026 | 0.6753 |
| R284 | -5.019 | 0.6796 |
| R285 | -5.012 | 0.6839 |
| R286 | -5.005 | 0.6883 |
| R287 | -4.998 | 0.6927 |
| R288 | -4.991 | 0.6971 |
| R289 | -4.984 | 0.7015 |
| R290 | -4.977 | 0.706  |
| R291 | -4.97  | 0.7105 |
| R292 | -4.963 | 0.715  |
| R293 | -4.956 | 0.7195 |
| R294 | -4.949 | 0.7241 |
| R295 | -4.942 | 0.7287 |
| R296 | -4.935 | 0.7333 |
| R297 | -4.928 | 0.738  |
| R298 | -4.921 | 0.7426 |
| R299 | -4.914 | 0.7473 |
| R300 | -4.907 | 0.7521 |
| R301 | -4.9   | 0.7568 |
| R302 | -4.893 | 0.7616 |
| R303 | -4.886 | 0.7664 |
| R304 | -4.879 | 0.7712 |
| R305 | -4.872 | 0.7761 |
| R306 | -4.865 | 0.781  |
| R307 | -4.858 | 0.7859 |
| R308 | -4.851 | 0.7909 |

|      |        |        |
|------|--------|--------|
| R309 | -4.844 | 0.7958 |
| R310 | -4.837 | 0.8008 |
| R311 | -4.83  | 0.8059 |
| R312 | -4.823 | 0.8109 |
| R313 | -4.816 | 0.816  |
| R314 | -4.809 | 0.8211 |
| R315 | -4.802 | 0.8263 |
| R316 | -4.795 | 0.8315 |
| R317 | -4.788 | 0.8367 |
| R318 | -4.781 | 0.8419 |
| R319 | -4.774 | 0.8472 |
| R320 | -4.767 | 0.8525 |
| R321 | -4.76  | 0.8578 |
| R322 | -4.753 | 0.8631 |
| R323 | -4.746 | 0.8685 |
| R324 | -4.739 | 0.8739 |
| R325 | -4.732 | 0.8794 |
| R326 | -4.725 | 0.8848 |
| R327 | -4.718 | 0.8903 |
| R328 | -4.711 | 0.8959 |
| R329 | -4.704 | 0.9014 |
| R330 | -4.697 | 0.907  |
| R331 | -4.69  | 0.9127 |
| R332 | -4.683 | 0.9183 |
| R333 | -4.676 | 0.924  |
| R334 | -4.669 | 0.9297 |

|      |        |        |
|------|--------|--------|
| R335 | -4.662 | 0.9355 |
| R336 | -4.655 | 0.9413 |
| R337 | -4.648 | 0.9471 |
| R338 | -4.641 | 0.9529 |
| R339 | -4.634 | 0.9588 |
| R340 | -4.627 | 0.9647 |
| R341 | -4.62  | 0.9706 |
| R342 | -4.613 | 0.9766 |
| R343 | -4.606 | 0.9826 |
| R344 | -4.599 | 0.9887 |
| R345 | -4.592 | 0.9947 |
| R346 | -4.585 | 1.0008 |
| R347 | -4.578 | 1.007  |
| R348 | -4.571 | 1.0131 |
| R349 | -4.564 | 1.0194 |
| R350 | -4.557 | 1.0256 |
| R351 | -4.55  | 1.0319 |
| R352 | -4.543 | 1.0382 |
| R353 | -4.536 | 1.0445 |
| R354 | -4.529 | 1.0509 |
| R355 | -4.522 | 1.0573 |
| R356 | -4.515 | 1.0637 |
| R357 | -4.508 | 1.0702 |
| R358 | -4.501 | 1.0767 |
| R359 | -4.494 | 1.0833 |
| R360 | -4.487 | 1.0898 |

|      |        |        |
|------|--------|--------|
| R361 | -4.48  | 1.0965 |
| R362 | -4.473 | 1.1031 |
| R363 | -4.466 | 1.1098 |
| R364 | -4.459 | 1.1165 |
| R365 | -4.452 | 1.1233 |
| R366 | -4.445 | 1.1301 |
| R367 | -4.438 | 1.1369 |
| R368 | -4.431 | 1.1438 |
| R369 | -4.424 | 1.1507 |
| R370 | -4.417 | 1.1576 |
| R371 | -4.41  | 1.1646 |
| R372 | -4.403 | 1.1716 |
| R373 | -4.396 | 1.1787 |
| R374 | -4.389 | 1.1857 |
| R375 | -4.382 | 1.1929 |
| R376 | -4.375 | 1.2    |
| R377 | -4.368 | 1.2072 |
| R378 | -4.361 | 1.2145 |
| R379 | -4.354 | 1.2217 |
| R380 | -4.347 | 1.229  |
| R381 | -4.34  | 1.2364 |
| R382 | -4.333 | 1.2438 |
| R383 | -4.326 | 1.2512 |
| R384 | -4.319 | 1.2587 |
| R385 | -4.312 | 1.2662 |
| R386 | -4.305 | 1.2737 |

|      |        |        |
|------|--------|--------|
| R387 | -4.298 | 1.2813 |
| R388 | -4.291 | 1.2889 |
| R389 | -4.284 | 1.2966 |
| R390 | -4.277 | 1.3043 |
| R391 | -4.27  | 1.312  |
| R392 | -4.263 | 1.3198 |
| R393 | -4.256 | 1.3276 |
| R394 | -4.249 | 1.3355 |
| R395 | -4.242 | 1.3434 |
| R396 | -4.235 | 1.3513 |
| R397 | -4.228 | 1.3593 |
| R398 | -4.221 | 1.3673 |
| R399 | -4.214 | 1.3754 |
| R400 | -4.207 | 1.3835 |
| R401 | -4.2   | 1.3916 |
| R402 | -4.193 | 1.3998 |
| R403 | -4.186 | 1.408  |
| R404 | -4.179 | 1.4163 |
| R405 | -4.172 | 1.4246 |
| R406 | -4.165 | 1.433  |
| R407 | -4.158 | 1.4414 |
| R408 | -4.151 | 1.4498 |
| R409 | -4.144 | 1.4583 |
| R410 | -4.137 | 1.4668 |
| R411 | -4.13  | 1.4754 |
| R412 | -4.123 | 1.484  |



|      |        |        |
|------|--------|--------|
| R413 | -4.116 | 1.4926 |
| R414 | -4.109 | 1.5013 |
| R415 | -4.102 | 1.5101 |
| R416 | -4.095 | 1.5189 |
| R417 | -4.088 | 1.5277 |
| R418 | -4.081 | 1.5366 |
| R419 | -4.074 | 1.5455 |
| R420 | -4.067 | 1.5545 |
| R421 | -4.06  | 1.5635 |
| R422 | -4.053 | 1.5725 |
| R423 | -4.046 | 1.5816 |
| R424 | -4.039 | 1.5908 |
| R425 | -4.032 | 1.5999 |
| R426 | -4.025 | 1.6092 |
| R427 | -4.018 | 1.6185 |
| R428 | -4.011 | 1.6278 |
| R429 | -4.004 | 1.6372 |
| R430 | -3.997 | 1.6466 |
| R431 | -3.99  | 1.6561 |
| R432 | -3.983 | 1.6656 |
| R433 | -3.976 | 1.6751 |
| R434 | -3.969 | 1.6847 |
| R435 | -3.962 | 1.6944 |
| R436 | -3.955 | 1.7041 |
| R437 | -3.948 | 1.7139 |
| R438 | -3.941 | 1.7237 |

|      |        |        |
|------|--------|--------|
| R439 | -3.934 | 1.7335 |
| R440 | -3.927 | 1.7434 |
| R441 | -3.92  | 1.7534 |
| R442 | -3.913 | 1.7634 |
| R443 | -3.906 | 1.7734 |
| R444 | -3.899 | 1.7835 |
| R445 | -3.892 | 1.7937 |
| R446 | -3.885 | 1.8039 |
| R447 | -3.878 | 1.8141 |
| R448 | -3.871 | 1.8244 |
| R449 | -3.864 | 1.8347 |
| R450 | -3.857 | 1.8451 |
| R451 | -3.85  | 1.8556 |
| R452 | -3.843 | 1.8661 |
| R453 | -3.836 | 1.8767 |
| R454 | -3.829 | 1.8873 |
| R455 | -3.822 | 1.8979 |
| R456 | -3.815 | 1.9086 |
| R457 | -3.808 | 1.9194 |
| R458 | -3.801 | 1.9302 |
| R459 | -3.794 | 1.9411 |
| R460 | -3.787 | 1.952  |
| R461 | -3.78  | 1.963  |
| R462 | -3.773 | 1.974  |
| R463 | -3.766 | 1.9851 |
| R464 | -3.759 | 1.9962 |

|      |        |        |
|------|--------|--------|
| R465 | -3.752 | 2.0074 |
| R466 | -3.745 | 2.0187 |
| R467 | -3.738 | 2.03   |
| R468 | -3.731 | 2.0413 |
| R469 | -3.724 | 2.0528 |
| R470 | -3.717 | 2.0642 |
| R471 | -3.71  | 2.0758 |
| R472 | -3.703 | 2.0873 |
| R473 | -3.696 | 2.099  |
| R474 | -3.689 | 2.1107 |
| R475 | -3.682 | 2.1224 |
| R476 | -3.675 | 2.1343 |
| R477 | -3.668 | 2.1461 |
| R478 | -3.661 | 2.1581 |
| R479 | -3.654 | 2.1701 |
| R480 | -3.647 | 2.1821 |
| R481 | -3.64  | 2.1942 |
| R482 | -3.633 | 2.2064 |
| R483 | -3.626 | 2.2186 |
| R484 | -3.619 | 2.2309 |
| R485 | -3.612 | 2.2432 |
| R486 | -3.605 | 2.2556 |
| R487 | -3.598 | 2.2681 |
| R488 | -3.591 | 2.2807 |
| R489 | -3.584 | 2.2932 |
| R490 | -3.577 | 2.3059 |

|      |        |        |
|------|--------|--------|
| R491 | -3.57  | 2.3186 |
| R492 | -3.563 | 2.3314 |
| R493 | -3.556 | 2.3442 |
| R494 | -3.549 | 2.3571 |
| R495 | -3.542 | 2.3701 |
| R496 | -3.535 | 2.3832 |
| R497 | -3.528 | 2.3963 |
| R498 | -3.521 | 2.4094 |
| R499 | -3.514 | 2.4227 |
| R500 | -3.507 | 2.4359 |
| R501 | -3.5   | 2.4493 |
| R502 | -3.493 | 2.4627 |
| R503 | -3.486 | 2.4762 |
| R504 | -3.479 | 2.4898 |
| R505 | -3.472 | 2.5034 |
| R506 | -3.465 | 2.5171 |
| R507 | -3.458 | 2.5309 |
| R508 | -3.451 | 2.5447 |
| R509 | -3.444 | 2.5586 |
| R510 | -3.437 | 2.5726 |
| R511 | -3.43  | 2.5866 |
| R512 | -3.423 | 2.6007 |
| R513 | -3.416 | 2.6149 |
| R514 | -3.409 | 2.6292 |
| R515 | -3.402 | 2.6435 |
| R516 | -3.395 | 2.6579 |

|      |        |        |
|------|--------|--------|
| R517 | -3.388 | 2.6724 |
| R518 | -3.381 | 2.6869 |
| R519 | -3.374 | 2.7015 |
| R520 | -3.367 | 2.7162 |
| R521 | -3.36  | 2.731  |
| R522 | -3.353 | 2.7458 |
| R523 | -3.346 | 2.7607 |
| R524 | -3.339 | 2.7757 |
| R525 | -3.332 | 2.7908 |
| R526 | -3.325 | 2.8059 |
| R527 | -3.318 | 2.8211 |
| R528 | -3.311 | 2.8364 |
| R529 | -3.304 | 2.8518 |
| R530 | -3.297 | 2.8672 |
| R531 | -3.29  | 2.8828 |
| R532 | -3.283 | 2.8984 |
| R533 | -3.276 | 2.914  |
| R534 | -3.269 | 2.9298 |
| R535 | -3.262 | 2.9456 |
| R536 | -3.255 | 2.9616 |
| R537 | -3.248 | 2.9776 |
| R538 | -3.241 | 2.9937 |
| R539 | -3.234 | 3.0098 |
| R540 | -3.227 | 3.0261 |
| R541 | -3.22  | 3.0424 |
| R542 | -3.213 | 3.0588 |

|      |        |        |
|------|--------|--------|
| R543 | -3.206 | 3.0753 |
| R544 | -3.199 | 3.0919 |
| R545 | -3.192 | 3.1086 |
| R546 | -3.185 | 3.1254 |
| R547 | -3.178 | 3.1422 |
| R548 | -3.171 | 3.1591 |
| R549 | -3.164 | 3.1762 |
| R550 | -3.157 | 3.1933 |
| R551 | -3.15  | 3.2105 |
| R552 | -3.143 | 3.2277 |
| R553 | -3.136 | 3.2451 |
| R554 | -3.129 | 3.2626 |
| R555 | -3.122 | 3.2801 |
| R556 | -3.115 | 3.2978 |
| R557 | -3.108 | 3.3155 |
| R558 | -3.101 | 3.3333 |
| R559 | -3.094 | 3.3513 |
| R560 | -3.087 | 3.3693 |
| R561 | -3.08  | 3.3874 |
| R562 | -3.073 | 3.4056 |
| R563 | -3.066 | 3.4239 |
| R564 | -3.059 | 3.4423 |
| R565 | -3.052 | 3.4608 |
| R566 | -3.045 | 3.4794 |
| R567 | -3.038 | 3.498  |
| R568 | -3.031 | 3.5168 |

|      |        |        |
|------|--------|--------|
| R569 | -3.024 | 3.5357 |
| R570 | -3.017 | 3.5547 |
| R571 | -3.01  | 3.5738 |
| R572 | -3.003 | 3.5929 |
| R573 | -2.996 | 3.6122 |
| R574 | -2.989 | 3.6316 |
| R575 | -2.982 | 3.6511 |
| R576 | -2.975 | 3.6707 |
| R577 | -2.968 | 3.6903 |
| R578 | -2.961 | 3.7101 |
| R579 | -2.954 | 3.73   |
| R580 | -2.947 | 3.75   |
| R581 | -2.94  | 3.7701 |
| R582 | -2.933 | 3.7903 |
| R583 | -2.926 | 3.8106 |
| R584 | -2.919 | 3.8311 |
| R585 | -2.912 | 3.8516 |
| R586 | -2.905 | 3.8722 |
| R587 | -2.898 | 3.893  |
| R588 | -2.891 | 3.9138 |
| R589 | -2.884 | 3.9348 |
| R590 | -2.877 | 3.9559 |
| R591 | -2.87  | 3.977  |
| R592 | -2.863 | 3.9983 |
| R593 | -2.856 | 4.0197 |
| R594 | -2.849 | 4.0413 |

|      |        |        |
|------|--------|--------|
| R595 | -2.842 | 4.0629 |
| R596 | -2.835 | 4.0846 |
| R597 | -2.828 | 4.1065 |
| R598 | -2.821 | 4.1285 |
| R599 | -2.814 | 4.1506 |
| R600 | -2.807 | 4.1728 |
| R601 | -2.8   | 4.1951 |
| R602 | -2.793 | 4.2175 |
| R603 | -2.786 | 4.2401 |
| R604 | -2.779 | 4.2628 |
| R605 | -2.772 | 4.2856 |
| R606 | -2.765 | 4.3085 |
| R607 | -2.758 | 4.3315 |
| R608 | -2.751 | 4.3547 |
| R609 | -2.744 | 4.3779 |
| R610 | -2.737 | 4.4013 |
| R611 | -2.73  | 4.4248 |
| R612 | -2.723 | 4.4485 |
| R613 | -2.716 | 4.4722 |
| R614 | -2.709 | 4.4961 |
| R615 | -2.702 | 4.5201 |
| R616 | -2.695 | 4.5442 |
| R617 | -2.688 | 4.5685 |
| R618 | -2.681 | 4.5929 |
| R619 | -2.674 | 4.6174 |
| R620 | -2.667 | 4.642  |



|      |        |        |
|------|--------|--------|
| R621 | -2.66  | 4.6668 |
| R622 | -2.653 | 4.6916 |
| R623 | -2.646 | 4.7166 |
| R624 | -2.639 | 4.7418 |
| R625 | -2.632 | 4.767  |
| R626 | -2.625 | 4.7924 |
| R627 | -2.618 | 4.8179 |
| R628 | -2.611 | 4.8436 |
| R629 | -2.604 | 4.8694 |
| R630 | -2.597 | 4.8953 |
| R631 | -2.59  | 4.9213 |
| R632 | -2.583 | 4.9475 |
| R633 | -2.576 | 4.9737 |
| R634 | -2.569 | 5.0002 |
| R635 | -2.562 | 5.0267 |
| R636 | -2.555 | 5.0534 |
| R637 | -2.548 | 5.0802 |
| R638 | -2.541 | 5.1072 |
| R639 | -2.534 | 5.1342 |
| R640 | -2.527 | 5.1615 |
| R641 | -2.52  | 5.1888 |
| R642 | -2.513 | 5.2163 |
| R643 | -2.506 | 5.2439 |
| R644 | -2.499 | 5.2716 |
| R645 | -2.492 | 5.2995 |
| R646 | -2.485 | 5.3275 |

|      |        |        |
|------|--------|--------|
| R647 | -2.478 | 5.3556 |
| R648 | -2.471 | 5.3839 |
| R649 | -2.464 | 5.4123 |
| R650 | -2.457 | 5.4409 |
| R651 | -2.45  | 5.4695 |
| R652 | -2.443 | 5.4983 |
| R653 | -2.436 | 5.5273 |
| R654 | -2.429 | 5.5563 |
| R655 | -2.422 | 5.5855 |
| R656 | -2.415 | 5.6149 |
| R657 | -2.408 | 5.6443 |
| R658 | -2.401 | 5.6739 |
| R659 | -2.394 | 5.7037 |
| R660 | -2.387 | 5.7335 |
| R661 | -2.38  | 5.7635 |
| R662 | -2.373 | 5.7937 |
| R663 | -2.366 | 5.8239 |
| R664 | -2.359 | 5.8543 |
| R665 | -2.352 | 5.8849 |
| R666 | -2.345 | 5.9155 |
| R667 | -2.338 | 5.9463 |
| R668 | -2.331 | 5.9773 |
| R669 | -2.324 | 6.0083 |
| R670 | -2.317 | 6.0395 |
| R671 | -2.31  | 6.0708 |
| R672 | -2.303 | 6.1023 |

|      |        |        |
|------|--------|--------|
| R673 | -2.296 | 6.1338 |
| R674 | -2.289 | 6.1655 |
| R675 | -2.282 | 6.1974 |
| R676 | -2.275 | 6.2293 |
| R677 | -2.268 | 6.2614 |
| R678 | -2.261 | 6.2937 |
| R679 | -2.254 | 6.326  |
| R680 | -2.247 | 6.3585 |
| R681 | -2.24  | 6.3911 |
| R682 | -2.233 | 6.4238 |
| R683 | -2.226 | 6.4567 |
| R684 | -2.219 | 6.4896 |
| R685 | -2.212 | 6.5228 |
| R686 | -2.205 | 6.556  |
| R687 | -2.198 | 6.5893 |
| R688 | -2.191 | 6.6228 |
| R689 | -2.184 | 6.6564 |
| R690 | -2.177 | 6.6901 |
| R691 | -2.17  | 6.7239 |
| R692 | -2.163 | 6.7579 |
| R693 | -2.156 | 6.792  |
| R694 | -2.149 | 6.8262 |
| R695 | -2.142 | 6.8605 |
| R696 | -2.135 | 6.8949 |
| R697 | -2.128 | 6.9295 |
| R698 | -2.121 | 6.9641 |

|      |        |        |
|------|--------|--------|
| R699 | -2.114 | 6.9989 |
| R700 | -2.107 | 7.0338 |
| R701 | -2.1   | 7.0688 |
| R702 | -2.093 | 7.1039 |
| R703 | -2.086 | 7.1391 |
| R704 | -2.079 | 7.1745 |
| R705 | -2.072 | 7.2099 |
| R706 | -2.065 | 7.2455 |
| R707 | -2.058 | 7.2811 |
| R708 | -2.051 | 7.3169 |
| R709 | -2.044 | 7.3528 |
| R710 | -2.037 | 7.3888 |
| R711 | -2.03  | 7.4248 |
| R712 | -2.023 | 7.461  |
| R713 | -2.016 | 7.4973 |
| R714 | -2.009 | 7.5337 |
| R715 | -2.002 | 7.5702 |
| R716 | -1.995 | 7.6068 |
| R717 | -1.988 | 7.6435 |
| R718 | -1.981 | 7.6803 |
| R719 | -1.974 | 7.7172 |
| R720 | -1.967 | 7.7541 |
| R721 | -1.96  | 7.7912 |
| R722 | -1.953 | 7.8284 |
| R723 | -1.946 | 7.8656 |
| R724 | -1.939 | 7.903  |

|      |        |        |
|------|--------|--------|
| R725 | -1.932 | 7.9404 |
| R726 | -1.925 | 7.978  |
| R727 | -1.918 | 8.0156 |
| R728 | -1.911 | 8.0533 |
| R729 | -1.904 | 8.0911 |
| R730 | -1.897 | 8.1289 |
| R731 | -1.89  | 8.1669 |
| R732 | -1.883 | 8.2049 |
| R733 | -1.876 | 8.243  |
| R734 | -1.869 | 8.2812 |
| R735 | -1.862 | 8.3195 |
| R736 | -1.855 | 8.3579 |
| R737 | -1.848 | 8.3963 |
| R738 | -1.841 | 8.4348 |
| R739 | -1.834 | 8.4734 |
| R740 | -1.827 | 8.5121 |
| R741 | -1.82  | 8.5508 |
| R742 | -1.813 | 8.5896 |
| R743 | -1.806 | 8.6285 |
| R744 | -1.799 | 8.6674 |
| R745 | -1.792 | 8.7064 |
| R746 | -1.785 | 8.7455 |
| R747 | -1.778 | 8.7846 |
| R748 | -1.771 | 8.8238 |
| R749 | -1.764 | 8.8631 |
| R750 | -1.757 | 8.9024 |

|      |        |        |
|------|--------|--------|
| R751 | -1.75  | 8.9418 |
| R752 | -1.743 | 8.9813 |
| R753 | -1.736 | 9.0208 |
| R754 | -1.729 | 9.0603 |
| R755 | -1.722 | 9.1    |
| R756 | -1.715 | 9.1397 |
| R757 | -1.708 | 9.1794 |
| R758 | -1.701 | 9.2192 |
| R759 | -1.694 | 9.259  |
| R760 | -1.687 | 9.2989 |
| R761 | -1.68  | 9.3389 |
| R762 | -1.673 | 9.3789 |
| R763 | -1.666 | 9.4189 |
| R764 | -1.659 | 9.459  |
| R765 | -1.652 | 9.4991 |
| R766 | -1.645 | 9.5393 |
| R767 | -1.638 | 9.5796 |
| R768 | -1.631 | 9.6198 |
| R769 | -1.624 | 9.6601 |
| R770 | -1.617 | 9.7005 |
| R771 | -1.61  | 9.7409 |
| R772 | -1.603 | 9.7813 |
| R773 | -1.596 | 9.8218 |
| R774 | -1.589 | 9.8623 |
| R775 | -1.582 | 9.9028 |
| R776 | -1.575 | 9.9434 |

|      |        |         |
|------|--------|---------|
| R777 | -1.568 | 9.984   |
| R778 | -1.561 | 10.0247 |
| R779 | -1.554 | 10.0653 |
| R780 | -1.547 | 10.1061 |
| R781 | -1.54  | 10.1468 |
| R782 | -1.533 | 10.1876 |
| R783 | -1.526 | 10.2283 |
| R784 | -1.519 | 10.2692 |
| R785 | -1.512 | 10.31   |
| R786 | -1.505 | 10.3509 |
| R787 | -1.498 | 10.3918 |
| R788 | -1.491 | 10.4327 |
| R789 | -1.484 | 10.4736 |
| R790 | -1.477 | 10.5146 |
| R791 | -1.47  | 10.5555 |
| R792 | -1.463 | 10.5965 |
| R793 | -1.456 | 10.6375 |
| R794 | -1.449 | 10.6786 |
| R795 | -1.442 | 10.7196 |
| R796 | -1.435 | 10.7607 |
| R797 | -1.428 | 10.8017 |
| R798 | -1.421 | 10.8428 |
| R799 | -1.414 | 10.8839 |
| R800 | -1.407 | 10.925  |
| R801 | -1.4   | 10.9661 |
| R802 | -1.393 | 11.0072 |

|      |        |         |
|------|--------|---------|
| R803 | -1.386 | 11.0483 |
| R804 | -1.379 | 11.0894 |
| R805 | -1.372 | 11.1305 |
| R806 | -1.365 | 11.1716 |
| R807 | -1.358 | 11.2127 |
| R808 | -1.351 | 11.2538 |
| R809 | -1.344 | 11.2949 |
| R810 | -1.337 | 11.336  |
| R811 | -1.33  | 11.3771 |
| R812 | -1.323 | 11.4182 |
| R813 | -1.316 | 11.4592 |
| R814 | -1.309 | 11.5003 |
| R815 | -1.302 | 11.5414 |
| R816 | -1.295 | 11.5824 |
| R817 | -1.288 | 11.6234 |
| R818 | -1.281 | 11.6644 |
| R819 | -1.274 | 11.7054 |
| R820 | -1.267 | 11.7463 |
| R821 | -1.26  | 11.7873 |
| R822 | -1.253 | 11.8282 |
| R823 | -1.246 | 11.869  |
| R824 | -1.239 | 11.9099 |
| R825 | -1.232 | 11.9507 |
| R826 | -1.225 | 11.9915 |
| R827 | -1.218 | 12.0322 |
| R828 | -1.211 | 12.0729 |



|      |        |         |
|------|--------|---------|
| R829 | -1.204 | 12.1136 |
| R830 | -1.197 | 12.1543 |
| R831 | -1.19  | 12.1948 |
| R832 | -1.183 | 12.2354 |
| R833 | -1.176 | 12.2759 |
| R834 | -1.169 | 12.3163 |
| R835 | -1.162 | 12.3567 |
| R836 | -1.155 | 12.397  |
| R837 | -1.148 | 12.4373 |
| R838 | -1.141 | 12.4776 |
| R839 | -1.134 | 12.5177 |
| R840 | -1.127 | 12.5578 |
| R841 | -1.12  | 12.5978 |
| R842 | -1.113 | 12.6378 |
| R843 | -1.106 | 12.6777 |
| R844 | -1.099 | 12.7175 |
| R845 | -1.092 | 12.7572 |
| R846 | -1.085 | 12.7968 |
| R847 | -1.078 | 12.8364 |
| R848 | -1.071 | 12.8759 |
| R849 | -1.064 | 12.9153 |
| R850 | -1.057 | 12.9546 |
| R851 | -1.05  | 12.9938 |
| R852 | -1.043 | 13.0329 |
| R853 | -1.036 | 13.0719 |
| R854 | -1.029 | 13.1108 |

|      |        |         |
|------|--------|---------|
| R855 | -1.022 | 13.1495 |
| R856 | -1.015 | 13.1882 |
| R857 | -1.008 | 13.2268 |
| R858 | -1.001 | 13.2652 |
| R859 | -0.994 | 13.3035 |
| R860 | -0.987 | 13.3417 |
| R861 | -0.98  | 13.3798 |
| R862 | -0.973 | 13.4177 |
| R863 | -0.966 | 13.4555 |
| R864 | -0.959 | 13.4932 |
| R865 | -0.952 | 13.5307 |
| R866 | -0.945 | 13.5681 |
| R867 | -0.938 | 13.6053 |
| R868 | -0.931 | 13.6424 |
| R869 | -0.924 | 13.6793 |
| R870 | -0.917 | 13.7161 |
| R871 | -0.91  | 13.7527 |
| R872 | -0.903 | 13.7891 |
| R873 | -0.896 | 13.8254 |
| R874 | -0.889 | 13.8615 |
| R875 | -0.882 | 13.8974 |
| R876 | -0.875 | 13.9331 |
| R877 | -0.868 | 13.9686 |
| R878 | -0.861 | 14.004  |
| R879 | -0.854 | 14.0391 |
| R880 | -0.847 | 14.0741 |

|      |        |         |
|------|--------|---------|
| R881 | -0.84  | 14.1089 |
| R882 | -0.833 | 14.1434 |
| R883 | -0.826 | 14.1778 |
| R884 | -0.819 | 14.2119 |
| R885 | -0.812 | 14.2458 |
| R886 | -0.805 | 14.2795 |
| R887 | -0.798 | 14.313  |
| R888 | -0.791 | 14.3463 |
| R889 | -0.784 | 14.3793 |
| R890 | -0.777 | 14.4121 |
| R891 | -0.77  | 14.4446 |
| R892 | -0.763 | 14.4769 |
| R893 | -0.756 | 14.509  |
| R894 | -0.749 | 14.5408 |
| R895 | -0.742 | 14.5723 |
| R896 | -0.735 | 14.6036 |
| R897 | -0.728 | 14.6347 |
| R898 | -0.721 | 14.6654 |
| R899 | -0.714 | 14.6959 |
| R900 | -0.707 | 14.7262 |
| R901 | -0.7   | 14.7561 |
| R902 | -0.693 | 14.7858 |
| R903 | -0.686 | 14.8152 |
| R904 | -0.679 | 14.8443 |
| R905 | -0.672 | 14.8731 |
| R906 | -0.665 | 14.9016 |

|      |        |         |
|------|--------|---------|
| R907 | -0.658 | 14.9298 |
| R908 | -0.651 | 14.9578 |
| R909 | -0.644 | 14.9854 |
| R910 | -0.637 | 15.0127 |
| R911 | -0.63  | 15.0397 |
| R912 | -0.623 | 15.0664 |
| R913 | -0.616 | 15.0928 |
| R914 | -0.609 | 15.1189 |
| R915 | -0.602 | 15.1446 |
| R916 | -0.595 | 15.17   |
| R917 | -0.588 | 15.1951 |
| R918 | -0.581 | 15.2199 |
| R919 | -0.574 | 15.2443 |
| R920 | -0.567 | 15.2684 |
| R921 | -0.56  | 15.2921 |
| R922 | -0.553 | 15.3155 |
| R923 | -0.546 | 15.3386 |
| R924 | -0.539 | 15.3613 |
| R925 | -0.532 | 15.3837 |
| R926 | -0.525 | 15.4058 |
| R927 | -0.518 | 15.4274 |
| R928 | -0.511 | 15.4488 |
| R929 | -0.504 | 15.4697 |
| R930 | -0.497 | 15.4903 |
| R931 | -0.49  | 15.5106 |
| R932 | -0.483 | 15.5305 |

|      |        |         |
|------|--------|---------|
| R933 | -0.476 | 15.55   |
| R934 | -0.469 | 15.5692 |
| R935 | -0.462 | 15.588  |
| R936 | -0.455 | 15.6064 |
| R937 | -0.448 | 15.6245 |
| R938 | -0.441 | 15.6422 |
| R939 | -0.434 | 15.6595 |
| R940 | -0.427 | 15.6765 |
| R941 | -0.42  | 15.6931 |
| R942 | -0.413 | 15.7093 |
| R943 | -0.406 | 15.7251 |
| R944 | -0.399 | 15.7406 |
| R945 | -0.392 | 15.7557 |
| R946 | -0.385 | 15.7704 |
| R947 | -0.378 | 15.7847 |
| R948 | -0.371 | 15.7987 |
| R949 | -0.364 | 15.8123 |
| R950 | -0.357 | 15.8255 |
| R951 | -0.35  | 15.8383 |
| R952 | -0.343 | 15.8508 |
| R953 | -0.336 | 15.8629 |
| R954 | -0.329 | 15.8746 |
| R955 | -0.322 | 15.8859 |
| R956 | -0.315 | 15.8969 |
| R957 | -0.308 | 15.9075 |
| R958 | -0.301 | 15.9177 |

|      |        |         |
|------|--------|---------|
| R959 | -0.294 | 15.9276 |
| R960 | -0.287 | 15.937  |
| R961 | -0.28  | 15.9461 |
| R962 | -0.273 | 15.9549 |
| R963 | -0.266 | 15.9633 |
| R964 | -0.259 | 15.9713 |
| R965 | -0.252 | 15.9789 |
| R966 | -0.245 | 15.9862 |
| R967 | -0.238 | 15.9931 |
| R968 | -0.231 | 15.9996 |
| R969 | -0.224 | 16.0058 |
| R970 | -0.217 | 16.0117 |
| R971 | -0.21  | 16.0171 |
| R972 | -0.203 | 16.0223 |
| R973 | -0.196 | 16.027  |
| R974 | -0.189 | 16.0315 |
| R975 | -0.182 | 16.0356 |
| R976 | -0.175 | 16.0393 |
| R977 | -0.168 | 16.0427 |
| R978 | -0.161 | 16.0457 |
| R979 | -0.154 | 16.0485 |
| R980 | -0.147 | 16.0509 |
| R981 | -0.14  | 16.0529 |
| R982 | -0.133 | 16.0546 |
| R983 | -0.126 | 16.056  |
| R984 | -0.119 | 16.0571 |

|       |        |         |                                 |
|-------|--------|---------|---------------------------------|
| R985  | -0.112 | 16.0578 |                                 |
| R986  | -0.105 | 16.0583 |                                 |
| R987  | -0.098 | 16.0584 | * highest information at -0.098 |
| R988  | -0.091 | 16.0582 |                                 |
| R989  | -0.084 | 16.0577 |                                 |
| R990  | -0.077 | 16.0569 |                                 |
| R991  | -0.07  | 16.0558 |                                 |
| R992  | -0.063 | 16.0544 |                                 |
| R993  | -0.056 | 16.0527 |                                 |
| R994  | -0.049 | 16.0507 |                                 |
| R995  | -0.042 | 16.0484 |                                 |
| R996  | -0.035 | 16.0459 |                                 |
| R997  | -0.028 | 16.043  |                                 |
| R998  | -0.021 | 16.0399 |                                 |
| R999  | -0.014 | 16.0365 |                                 |
| R1000 | -0.007 | 16.0328 |                                 |
| R1001 | 0      | 16.0289 |                                 |
| R1002 | 0.007  | 16.0247 |                                 |
| R1003 | 0.014  | 16.0202 |                                 |
| R1004 | 0.021  | 16.0155 |                                 |
| R1005 | 0.028  | 16.0106 |                                 |
| R1006 | 0.035  | 16.0053 |                                 |
| R1007 | 0.042  | 15.9999 |                                 |
| R1008 | 0.049  | 15.9942 |                                 |
| R1009 | 0.056  | 15.9882 |                                 |
| R1010 | 0.063  | 15.982  |                                 |

|       |       |         |
|-------|-------|---------|
| R1011 | 0.07  | 15.9757 |
| R1012 | 0.077 | 15.969  |
| R1013 | 0.084 | 15.9622 |
| R1014 | 0.091 | 15.9551 |
| R1015 | 0.098 | 15.9478 |
| R1016 | 0.105 | 15.9403 |
| R1017 | 0.112 | 15.9326 |
| R1018 | 0.119 | 15.9247 |
| R1019 | 0.126 | 15.9166 |
| R1020 | 0.133 | 15.9083 |
| R1021 | 0.14  | 15.8998 |
| R1022 | 0.147 | 15.8912 |
| R1023 | 0.154 | 15.8823 |
| R1024 | 0.161 | 15.8733 |
| R1025 | 0.168 | 15.864  |
| R1026 | 0.175 | 15.8547 |
| R1027 | 0.182 | 15.8451 |
| R1028 | 0.189 | 15.8354 |
| R1029 | 0.196 | 15.8255 |
| R1030 | 0.203 | 15.8154 |
| R1031 | 0.21  | 15.8052 |
| R1032 | 0.217 | 15.7949 |
| R1033 | 0.224 | 15.7844 |
| R1034 | 0.231 | 15.7737 |
| R1035 | 0.238 | 15.763  |
| R1036 | 0.245 | 15.752  |



|       |       |         |
|-------|-------|---------|
| R1037 | 0.252 | 15.741  |
| R1038 | 0.259 | 15.7298 |
| R1039 | 0.266 | 15.7185 |
| R1040 | 0.273 | 15.707  |
| R1041 | 0.28  | 15.6955 |
| R1042 | 0.287 | 15.6838 |
| R1043 | 0.294 | 15.672  |
| R1044 | 0.301 | 15.6601 |
| R1045 | 0.308 | 15.6481 |
| R1046 | 0.315 | 15.6359 |
| R1047 | 0.322 | 15.6237 |
| R1048 | 0.329 | 15.6114 |
| R1049 | 0.336 | 15.5989 |
| R1050 | 0.343 | 15.5864 |
| R1051 | 0.35  | 15.5738 |
| R1052 | 0.357 | 15.5611 |
| R1053 | 0.364 | 15.5482 |
| R1054 | 0.371 | 15.5354 |
| R1055 | 0.378 | 15.5224 |
| R1056 | 0.385 | 15.5093 |
| R1057 | 0.392 | 15.4962 |
| R1058 | 0.399 | 15.483  |
| R1059 | 0.406 | 15.4697 |
| R1060 | 0.413 | 15.4563 |
| R1061 | 0.42  | 15.4429 |
| R1062 | 0.427 | 15.4293 |

|       |       |         |
|-------|-------|---------|
| R1063 | 0.434 | 15.4158 |
| R1064 | 0.441 | 15.4021 |
| R1065 | 0.448 | 15.3884 |
| R1066 | 0.455 | 15.3746 |
| R1067 | 0.462 | 15.3607 |
| R1068 | 0.469 | 15.3468 |
| R1069 | 0.476 | 15.3329 |
| R1070 | 0.483 | 15.3188 |
| R1071 | 0.49  | 15.3047 |
| R1072 | 0.497 | 15.2906 |
| R1073 | 0.504 | 15.2764 |
| R1074 | 0.511 | 15.2621 |
| R1075 | 0.518 | 15.2478 |
| R1076 | 0.525 | 15.2334 |
| R1077 | 0.532 | 15.219  |
| R1078 | 0.539 | 15.2045 |
| R1079 | 0.546 | 15.1899 |
| R1080 | 0.553 | 15.1753 |
| R1081 | 0.56  | 15.1607 |
| R1082 | 0.567 | 15.146  |
| R1083 | 0.574 | 15.1312 |
| R1084 | 0.581 | 15.1164 |
| R1085 | 0.588 | 15.1015 |
| R1086 | 0.595 | 15.0866 |
| R1087 | 0.602 | 15.0716 |
| R1088 | 0.609 | 15.0566 |

|       |       |         |
|-------|-------|---------|
| R1089 | 0.616 | 15.0415 |
| R1090 | 0.623 | 15.0263 |
| R1091 | 0.63  | 15.0111 |
| R1092 | 0.637 | 14.9959 |
| R1093 | 0.644 | 14.9805 |
| R1094 | 0.651 | 14.9652 |
| R1095 | 0.658 | 14.9497 |
| R1096 | 0.665 | 14.9342 |
| R1097 | 0.672 | 14.9187 |
| R1098 | 0.679 | 14.903  |
| R1099 | 0.686 | 14.8874 |
| R1100 | 0.693 | 14.8716 |
| R1101 | 0.7   | 14.8558 |
| R1102 | 0.707 | 14.8399 |
| R1103 | 0.714 | 14.8239 |
| R1104 | 0.721 | 14.8079 |
| R1105 | 0.728 | 14.7918 |
| R1106 | 0.735 | 14.7756 |
| R1107 | 0.742 | 14.7594 |
| R1108 | 0.749 | 14.743  |
| R1109 | 0.756 | 14.7266 |
| R1110 | 0.763 | 14.7102 |
| R1111 | 0.77  | 14.6936 |
| R1112 | 0.777 | 14.6769 |
| R1113 | 0.784 | 14.6602 |
| R1114 | 0.791 | 14.6433 |

|       |       |         |
|-------|-------|---------|
| R1115 | 0.798 | 14.6264 |
| R1116 | 0.805 | 14.6094 |
| R1117 | 0.812 | 14.5923 |
| R1118 | 0.819 | 14.5751 |
| R1119 | 0.826 | 14.5577 |
| R1120 | 0.833 | 14.5403 |
| R1121 | 0.84  | 14.5228 |
| R1122 | 0.847 | 14.5052 |
| R1123 | 0.854 | 14.4874 |
| R1124 | 0.861 | 14.4696 |
| R1125 | 0.868 | 14.4517 |
| R1126 | 0.875 | 14.4336 |
| R1127 | 0.882 | 14.4154 |
| R1128 | 0.889 | 14.397  |
| R1129 | 0.896 | 14.3786 |
| R1130 | 0.903 | 14.36   |
| R1131 | 0.91  | 14.3413 |
| R1132 | 0.917 | 14.3225 |
| R1133 | 0.924 | 14.3035 |
| R1134 | 0.931 | 14.2844 |
| R1135 | 0.938 | 14.2652 |
| R1136 | 0.945 | 14.2458 |
| R1137 | 0.952 | 14.2263 |
| R1138 | 0.959 | 14.2066 |
| R1139 | 0.966 | 14.1868 |
| R1140 | 0.973 | 14.1668 |

|       |       |         |
|-------|-------|---------|
| R1141 | 0.98  | 14.1466 |
| R1142 | 0.987 | 14.1264 |
| R1143 | 0.994 | 14.1059 |
| R1144 | 1.001 | 14.0853 |
| R1145 | 1.008 | 14.0645 |
| R1146 | 1.015 | 14.0435 |
| R1147 | 1.022 | 14.0224 |
| R1148 | 1.029 | 14.0011 |
| R1149 | 1.036 | 13.9797 |
| R1150 | 1.043 | 13.958  |
| R1151 | 1.05  | 13.9362 |
| R1152 | 1.057 | 13.9141 |
| R1153 | 1.064 | 13.892  |
| R1154 | 1.071 | 13.8696 |
| R1155 | 1.078 | 13.847  |
| R1156 | 1.085 | 13.8242 |
| R1157 | 1.092 | 13.8012 |
| R1158 | 1.099 | 13.7781 |
| R1159 | 1.106 | 13.7547 |
| R1160 | 1.113 | 13.7312 |
| R1161 | 1.12  | 13.7074 |
| R1162 | 1.127 | 13.6834 |
| R1163 | 1.134 | 13.6592 |
| R1164 | 1.141 | 13.6348 |
| R1165 | 1.148 | 13.6102 |
| R1166 | 1.155 | 13.5854 |

|       |       |         |
|-------|-------|---------|
| R1167 | 1.162 | 13.5604 |
| R1168 | 1.169 | 13.5351 |
| R1169 | 1.176 | 13.5096 |
| R1170 | 1.183 | 13.4839 |
| R1171 | 1.19  | 13.458  |
| R1172 | 1.197 | 13.4319 |
| R1173 | 1.204 | 13.4055 |
| R1174 | 1.211 | 13.3789 |
| R1175 | 1.218 | 13.3521 |
| R1176 | 1.225 | 13.325  |
| R1177 | 1.232 | 13.2978 |
| R1178 | 1.239 | 13.2702 |
| R1179 | 1.246 | 13.2425 |
| R1180 | 1.253 | 13.2145 |
| R1181 | 1.26  | 13.1863 |
| R1182 | 1.267 | 13.1578 |
| R1183 | 1.274 | 13.1291 |
| R1184 | 1.281 | 13.1002 |
| R1185 | 1.288 | 13.071  |
| R1186 | 1.295 | 13.0416 |
| R1187 | 1.302 | 13.012  |
| R1188 | 1.309 | 12.9821 |
| R1189 | 1.316 | 12.9519 |
| R1190 | 1.323 | 12.9215 |
| R1191 | 1.33  | 12.8909 |
| R1192 | 1.337 | 12.8601 |

|       |       |         |
|-------|-------|---------|
| R1193 | 1.344 | 12.829  |
| R1194 | 1.351 | 12.7976 |
| R1195 | 1.358 | 12.766  |
| R1196 | 1.365 | 12.7342 |
| R1197 | 1.372 | 12.7021 |
| R1198 | 1.379 | 12.6698 |
| R1199 | 1.386 | 12.6373 |
| R1200 | 1.393 | 12.6044 |
| R1201 | 1.4   | 12.5714 |
| R1202 | 1.407 | 12.5381 |
| R1203 | 1.414 | 12.5046 |
| R1204 | 1.421 | 12.4708 |
| R1205 | 1.428 | 12.4368 |
| R1206 | 1.435 | 12.4026 |
| R1207 | 1.442 | 12.3681 |
| R1208 | 1.449 | 12.3334 |
| R1209 | 1.456 | 12.2985 |
| R1210 | 1.463 | 12.2633 |
| R1211 | 1.47  | 12.2279 |
| R1212 | 1.477 | 12.1923 |
| R1213 | 1.484 | 12.1564 |
| R1214 | 1.491 | 12.1203 |
| R1215 | 1.498 | 12.0839 |
| R1216 | 1.505 | 12.0474 |
| R1217 | 1.512 | 12.0106 |
| R1218 | 1.519 | 11.9736 |

|       |       |         |
|-------|-------|---------|
| R1219 | 1.526 | 11.9364 |
| R1220 | 1.533 | 11.8989 |
| R1221 | 1.54  | 11.8613 |
| R1222 | 1.547 | 11.8234 |
| R1223 | 1.554 | 11.7853 |
| R1224 | 1.561 | 11.747  |
| R1225 | 1.568 | 11.7085 |
| R1226 | 1.575 | 11.6698 |
| R1227 | 1.582 | 11.6309 |
| R1228 | 1.589 | 11.5917 |
| R1229 | 1.596 | 11.5524 |
| R1230 | 1.603 | 11.5129 |
| R1231 | 1.61  | 11.4732 |
| R1232 | 1.617 | 11.4333 |
| R1233 | 1.624 | 11.3931 |
| R1234 | 1.631 | 11.3529 |
| R1235 | 1.638 | 11.3124 |
| R1236 | 1.645 | 11.2718 |
| R1237 | 1.652 | 11.2309 |
| R1238 | 1.659 | 11.1899 |
| R1239 | 1.666 | 11.1487 |
| R1240 | 1.673 | 11.1074 |
| R1241 | 1.68  | 11.0659 |
| R1242 | 1.687 | 11.0241 |
| R1243 | 1.694 | 10.9823 |
| R1244 | 1.701 | 10.9403 |



|       |       |         |
|-------|-------|---------|
| R1245 | 1.708 | 10.8981 |
| R1246 | 1.715 | 10.8558 |
| R1247 | 1.722 | 10.8133 |
| R1248 | 1.729 | 10.7707 |
| R1249 | 1.736 | 10.728  |
| R1250 | 1.743 | 10.6851 |
| R1251 | 1.75  | 10.642  |
| R1252 | 1.757 | 10.5989 |
| R1253 | 1.764 | 10.5556 |
| R1254 | 1.771 | 10.5122 |
| R1255 | 1.778 | 10.4686 |
| R1256 | 1.785 | 10.4249 |
| R1257 | 1.792 | 10.3812 |
| R1258 | 1.799 | 10.3373 |
| R1259 | 1.806 | 10.2933 |
| R1260 | 1.813 | 10.2492 |
| R1261 | 1.82  | 10.205  |
| R1262 | 1.827 | 10.1607 |
| R1263 | 1.834 | 10.1162 |
| R1264 | 1.841 | 10.0717 |
| R1265 | 1.848 | 10.0272 |
| R1266 | 1.855 | 9.9825  |
| R1267 | 1.862 | 9.9378  |
| R1268 | 1.869 | 9.8929  |
| R1269 | 1.876 | 9.848   |
| R1270 | 1.883 | 9.8031  |

|       |       |        |
|-------|-------|--------|
| R1271 | 1.89  | 9.758  |
| R1272 | 1.897 | 9.7129 |
| R1273 | 1.904 | 9.6678 |
| R1274 | 1.911 | 9.6226 |
| R1275 | 1.918 | 9.5773 |
| R1276 | 1.925 | 9.532  |
| R1277 | 1.932 | 9.4866 |
| R1278 | 1.939 | 9.4412 |
| R1279 | 1.946 | 9.3958 |
| R1280 | 1.953 | 9.3504 |
| R1281 | 1.96  | 9.3048 |
| R1282 | 1.967 | 9.2593 |
| R1283 | 1.974 | 9.2138 |
| R1284 | 1.981 | 9.1682 |
| R1285 | 1.988 | 9.1226 |
| R1286 | 1.995 | 9.0771 |
| R1287 | 2.002 | 9.0314 |
| R1288 | 2.009 | 8.9859 |
| R1289 | 2.016 | 8.9402 |
| R1290 | 2.023 | 8.8946 |
| R1291 | 2.03  | 8.849  |
| R1292 | 2.037 | 8.8034 |
| R1293 | 2.044 | 8.7579 |
| R1294 | 2.051 | 8.7123 |
| R1295 | 2.058 | 8.6668 |
| R1296 | 2.065 | 8.6212 |

|       |       |        |
|-------|-------|--------|
| R1297 | 2.072 | 8.5757 |
| R1298 | 2.079 | 8.5303 |
| R1299 | 2.086 | 8.4848 |
| R1300 | 2.093 | 8.4394 |
| R1301 | 2.1   | 8.3941 |
| R1302 | 2.107 | 8.3487 |
| R1303 | 2.114 | 8.3035 |
| R1304 | 2.121 | 8.2582 |
| R1305 | 2.128 | 8.213  |
| R1306 | 2.135 | 8.1679 |
| R1307 | 2.142 | 8.1229 |
| R1308 | 2.149 | 8.0779 |
| R1309 | 2.156 | 8.0329 |
| R1310 | 2.163 | 7.988  |
| R1311 | 2.17  | 7.9432 |
| R1312 | 2.177 | 7.8985 |
| R1313 | 2.184 | 7.8538 |
| R1314 | 2.191 | 7.8092 |
| R1315 | 2.198 | 7.7647 |
| R1316 | 2.205 | 7.7203 |
| R1317 | 2.212 | 7.676  |
| R1318 | 2.219 | 7.6317 |
| R1319 | 2.226 | 7.5876 |
| R1320 | 2.233 | 7.5435 |
| R1321 | 2.24  | 7.4995 |
| R1322 | 2.247 | 7.4556 |

|       |       |        |
|-------|-------|--------|
| R1323 | 2.254 | 7.4119 |
| R1324 | 2.261 | 7.3682 |
| R1325 | 2.268 | 7.3246 |
| R1326 | 2.275 | 7.2812 |
| R1327 | 2.282 | 7.2379 |
| R1328 | 2.289 | 7.1946 |
| R1329 | 2.296 | 7.1515 |
| R1330 | 2.303 | 7.1085 |
| R1331 | 2.31  | 7.0656 |
| R1332 | 2.317 | 7.0229 |
| R1333 | 2.324 | 6.9802 |
| R1334 | 2.331 | 6.9377 |
| R1335 | 2.338 | 6.8954 |
| R1336 | 2.345 | 6.8531 |
| R1337 | 2.352 | 6.811  |
| R1338 | 2.359 | 6.769  |
| R1339 | 2.366 | 6.7272 |
| R1340 | 2.373 | 6.6854 |
| R1341 | 2.38  | 6.6439 |
| R1342 | 2.387 | 6.6024 |
| R1343 | 2.394 | 6.5611 |
| R1344 | 2.401 | 6.52   |
| R1345 | 2.408 | 6.479  |
| R1346 | 2.415 | 6.4381 |
| R1347 | 2.422 | 6.3974 |
| R1348 | 2.429 | 6.3569 |

|       |       |        |
|-------|-------|--------|
| R1349 | 2.436 | 6.3165 |
| R1350 | 2.443 | 6.2762 |
| R1351 | 2.45  | 6.2361 |
| R1352 | 2.457 | 6.1962 |
| R1353 | 2.464 | 6.1564 |
| R1354 | 2.471 | 6.1168 |
| R1355 | 2.478 | 6.0774 |
| R1356 | 2.485 | 6.038  |
| R1357 | 2.492 | 5.9989 |
| R1358 | 2.499 | 5.9599 |
| R1359 | 2.506 | 5.9211 |
| R1360 | 2.513 | 5.8825 |
| R1361 | 2.52  | 5.844  |
| R1362 | 2.527 | 5.8057 |
| R1363 | 2.534 | 5.7676 |
| R1364 | 2.541 | 5.7296 |
| R1365 | 2.548 | 5.6918 |
| R1366 | 2.555 | 5.6541 |
| R1367 | 2.562 | 5.6167 |
| R1368 | 2.569 | 5.5794 |
| R1369 | 2.576 | 5.5423 |
| R1370 | 2.583 | 5.5053 |
| R1371 | 2.59  | 5.4686 |
| R1372 | 2.597 | 5.432  |
| R1373 | 2.604 | 5.3956 |
| R1374 | 2.611 | 5.3593 |

|       |       |        |
|-------|-------|--------|
| R1375 | 2.618 | 5.3233 |
| R1376 | 2.625 | 5.2874 |
| R1377 | 2.632 | 5.2517 |
| R1378 | 2.639 | 5.2162 |
| R1379 | 2.646 | 5.1808 |
| R1380 | 2.653 | 5.1456 |
| R1381 | 2.66  | 5.1107 |
| R1382 | 2.667 | 5.0759 |
| R1383 | 2.674 | 5.0413 |
| R1384 | 2.681 | 5.0068 |
| R1385 | 2.688 | 4.9725 |
| R1386 | 2.695 | 4.9385 |
| R1387 | 2.702 | 4.9045 |
| R1388 | 2.709 | 4.8709 |
| R1389 | 2.716 | 4.8373 |
| R1390 | 2.723 | 4.804  |
| R1391 | 2.73  | 4.7708 |
| R1392 | 2.737 | 4.7378 |
| R1393 | 2.744 | 4.705  |
| R1394 | 2.751 | 4.6724 |
| R1395 | 2.758 | 4.64   |
| R1396 | 2.765 | 4.6077 |
| R1397 | 2.772 | 4.5756 |
| R1398 | 2.779 | 4.5437 |
| R1399 | 2.786 | 4.512  |
| R1400 | 2.793 | 4.4805 |

|       |       |        |
|-------|-------|--------|
| R1401 | 2.8   | 4.4491 |
| R1402 | 2.807 | 4.418  |
| R1403 | 2.814 | 4.387  |
| R1404 | 2.821 | 4.3562 |
| R1405 | 2.828 | 4.3255 |
| R1406 | 2.835 | 4.2951 |
| R1407 | 2.842 | 4.2649 |
| R1408 | 2.849 | 4.2348 |
| R1409 | 2.856 | 4.2049 |
| R1410 | 2.863 | 4.1752 |
| R1411 | 2.87  | 4.1457 |
| R1412 | 2.877 | 4.1163 |
| R1413 | 2.884 | 4.0871 |
| R1414 | 2.891 | 4.0581 |
| R1415 | 2.898 | 4.0293 |
| R1416 | 2.905 | 4.0006 |
| R1417 | 2.912 | 3.9722 |
| R1418 | 2.919 | 3.9439 |
| R1419 | 2.926 | 3.9158 |
| R1420 | 2.933 | 3.8878 |
| R1421 | 2.94  | 3.8601 |
| R1422 | 2.947 | 3.8325 |
| R1423 | 2.954 | 3.8051 |
| R1424 | 2.961 | 3.7779 |
| R1425 | 2.968 | 3.7508 |
| R1426 | 2.975 | 3.7239 |

|       |       |        |
|-------|-------|--------|
| R1427 | 2.982 | 3.6972 |
| R1428 | 2.989 | 3.6706 |
| R1429 | 2.996 | 3.6443 |
| R1430 | 3.003 | 3.6181 |
| R1431 | 3.01  | 3.592  |
| R1432 | 3.017 | 3.5662 |
| R1433 | 3.024 | 3.5405 |
| R1434 | 3.031 | 3.515  |
| R1435 | 3.038 | 3.4896 |
| R1436 | 3.045 | 3.4644 |
| R1437 | 3.052 | 3.4394 |
| R1438 | 3.059 | 3.4145 |
| R1439 | 3.066 | 3.3899 |
| R1440 | 3.073 | 3.3653 |
| R1441 | 3.08  | 3.341  |
| R1442 | 3.087 | 3.3168 |
| R1443 | 3.094 | 3.2927 |
| R1444 | 3.101 | 3.2689 |
| R1445 | 3.108 | 3.2452 |
| R1446 | 3.115 | 3.2216 |
| R1447 | 3.122 | 3.1982 |
| R1448 | 3.129 | 3.175  |
| R1449 | 3.136 | 3.1519 |
| R1450 | 3.143 | 3.129  |
| R1451 | 3.15  | 3.1062 |
| R1452 | 3.157 | 3.0836 |



|       |       |        |
|-------|-------|--------|
| R1453 | 3.164 | 3.0612 |
| R1454 | 3.171 | 3.0389 |
| R1455 | 3.178 | 3.0167 |
| R1456 | 3.185 | 2.9947 |
| R1457 | 3.192 | 2.9729 |
| R1458 | 3.199 | 2.9512 |
| R1459 | 3.206 | 2.9297 |
| R1460 | 3.213 | 2.9083 |
| R1461 | 3.22  | 2.887  |
| R1462 | 3.227 | 2.866  |
| R1463 | 3.234 | 2.845  |
| R1464 | 3.241 | 2.8242 |
| R1465 | 3.248 | 2.8036 |
| R1466 | 3.255 | 2.7831 |
| R1467 | 3.262 | 2.7627 |
| R1468 | 3.269 | 2.7425 |
| R1469 | 3.276 | 2.7224 |
| R1470 | 3.283 | 2.7025 |
| R1471 | 3.29  | 2.6827 |
| R1472 | 3.297 | 2.6631 |
| R1473 | 3.304 | 2.6436 |
| R1474 | 3.311 | 2.6243 |
| R1475 | 3.318 | 2.605  |
| R1476 | 3.325 | 2.5859 |
| R1477 | 3.332 | 2.5669 |
| R1478 | 3.339 | 2.5481 |

|       |       |        |
|-------|-------|--------|
| R1479 | 3.346 | 2.5294 |
| R1480 | 3.353 | 2.5109 |
| R1481 | 3.36  | 2.4925 |
| R1482 | 3.367 | 2.4742 |
| R1483 | 3.374 | 2.456  |
| R1484 | 3.381 | 2.438  |
| R1485 | 3.388 | 2.4201 |
| R1486 | 3.395 | 2.4024 |
| R1487 | 3.402 | 2.3847 |
| R1488 | 3.409 | 2.3672 |
| R1489 | 3.416 | 2.3498 |
| R1490 | 3.423 | 2.3326 |
| R1491 | 3.43  | 2.3154 |
| R1492 | 3.437 | 2.2984 |
| R1493 | 3.444 | 2.2816 |
| R1494 | 3.451 | 2.2648 |
| R1495 | 3.458 | 2.2482 |
| R1496 | 3.465 | 2.2317 |
| R1497 | 3.472 | 2.2153 |
| R1498 | 3.479 | 2.199  |
| R1499 | 3.486 | 2.1828 |
| R1500 | 3.493 | 2.1668 |
| R1501 | 3.5   | 2.1509 |
| R1502 | 3.507 | 2.1351 |
| R1503 | 3.514 | 2.1194 |
| R1504 | 3.521 | 2.1038 |

|       |       |        |
|-------|-------|--------|
| R1505 | 3.528 | 2.0884 |
| R1506 | 3.535 | 2.073  |
| R1507 | 3.542 | 2.0578 |
| R1508 | 3.549 | 2.0426 |
| R1509 | 3.556 | 2.0276 |
| R1510 | 3.563 | 2.0127 |
| R1511 | 3.57  | 1.998  |
| R1512 | 3.577 | 1.9833 |
| R1513 | 3.584 | 1.9687 |
| R1514 | 3.591 | 1.9542 |
| R1515 | 3.598 | 1.9399 |
| R1516 | 3.605 | 1.9256 |
| R1517 | 3.612 | 1.9115 |
| R1518 | 3.619 | 1.8974 |
| R1519 | 3.626 | 1.8835 |
| R1520 | 3.633 | 1.8697 |
| R1521 | 3.64  | 1.856  |
| R1522 | 3.647 | 1.8423 |
| R1523 | 3.654 | 1.8288 |
| R1524 | 3.661 | 1.8154 |
| R1525 | 3.668 | 1.802  |
| R1526 | 3.675 | 1.7888 |
| R1527 | 3.682 | 1.7757 |
| R1528 | 3.689 | 1.7627 |
| R1529 | 3.696 | 1.7497 |
| R1530 | 3.703 | 1.7369 |

|       |       |        |
|-------|-------|--------|
| R1531 | 3.71  | 1.7241 |
| R1532 | 3.717 | 1.7115 |
| R1533 | 3.724 | 1.6989 |
| R1534 | 3.731 | 1.6865 |
| R1535 | 3.738 | 1.6741 |
| R1536 | 3.745 | 1.6618 |
| R1537 | 3.752 | 1.6496 |
| R1538 | 3.759 | 1.6375 |
| R1539 | 3.766 | 1.6255 |
| R1540 | 3.773 | 1.6136 |
| R1541 | 3.78  | 1.6018 |
| R1542 | 3.787 | 1.5901 |
| R1543 | 3.794 | 1.5784 |
| R1544 | 3.801 | 1.5668 |
| R1545 | 3.808 | 1.5553 |
| R1546 | 3.815 | 1.5439 |
| R1547 | 3.822 | 1.5326 |
| R1548 | 3.829 | 1.5214 |
| R1549 | 3.836 | 1.5103 |
| R1550 | 3.843 | 1.4992 |
| R1551 | 3.85  | 1.4882 |
| R1552 | 3.857 | 1.4773 |
| R1553 | 3.864 | 1.4665 |
| R1554 | 3.871 | 1.4558 |
| R1555 | 3.878 | 1.4452 |
| R1556 | 3.885 | 1.4346 |

|       |       |        |
|-------|-------|--------|
| R1557 | 3.892 | 1.4241 |
| R1558 | 3.899 | 1.4137 |
| R1559 | 3.906 | 1.4033 |
| R1560 | 3.913 | 1.3931 |
| R1561 | 3.92  | 1.3829 |
| R1562 | 3.927 | 1.3728 |
| R1563 | 3.934 | 1.3627 |
| R1564 | 3.941 | 1.3528 |
| R1565 | 3.948 | 1.3429 |
| R1566 | 3.955 | 1.3331 |
| R1567 | 3.962 | 1.3234 |
| R1568 | 3.969 | 1.3137 |
| R1569 | 3.976 | 1.3041 |
| R1570 | 3.983 | 1.2946 |
| R1571 | 3.99  | 1.2851 |
| R1572 | 3.997 | 1.2758 |
| R1573 | 4.004 | 1.2665 |
| R1574 | 4.011 | 1.2572 |
| R1575 | 4.018 | 1.2481 |
| R1576 | 4.025 | 1.2389 |
| R1577 | 4.032 | 1.2299 |
| R1578 | 4.039 | 1.221  |
| R1579 | 4.046 | 1.212  |
| R1580 | 4.053 | 1.2032 |
| R1581 | 4.06  | 1.1944 |
| R1582 | 4.067 | 1.1857 |

|       |       |        |
|-------|-------|--------|
| R1583 | 4.074 | 1.1771 |
| R1584 | 4.081 | 1.1685 |
| R1585 | 4.088 | 1.16   |
| R1586 | 4.095 | 1.1516 |
| R1587 | 4.102 | 1.1432 |
| R1588 | 4.109 | 1.1349 |
| R1589 | 4.116 | 1.1266 |
| R1590 | 4.123 | 1.1184 |
| R1591 | 4.13  | 1.1103 |
| R1592 | 4.137 | 1.1022 |
| R1593 | 4.144 | 1.0942 |
| R1594 | 4.151 | 1.0863 |
| R1595 | 4.158 | 1.0784 |
| R1596 | 4.165 | 1.0705 |
| R1597 | 4.172 | 1.0628 |
| R1598 | 4.179 | 1.055  |
| R1599 | 4.186 | 1.0474 |
| R1600 | 4.193 | 1.0398 |
| R1601 | 4.2   | 1.0322 |
| R1602 | 4.207 | 1.0247 |
| R1603 | 4.214 | 1.0173 |
| R1604 | 4.221 | 1.0099 |
| R1605 | 4.228 | 1.0026 |
| R1606 | 4.235 | 0.9953 |
| R1607 | 4.242 | 0.9881 |
| R1608 | 4.249 | 0.9809 |

|       |       |        |
|-------|-------|--------|
| R1609 | 4.256 | 0.9738 |
| R1610 | 4.263 | 0.9667 |
| R1611 | 4.27  | 0.9598 |
| R1612 | 4.277 | 0.9528 |
| R1613 | 4.284 | 0.9459 |
| R1614 | 4.291 | 0.9391 |
| R1615 | 4.298 | 0.9323 |
| R1616 | 4.305 | 0.9255 |
| R1617 | 4.312 | 0.9188 |
| R1618 | 4.319 | 0.9122 |
| R1619 | 4.326 | 0.9056 |
| R1620 | 4.333 | 0.899  |
| R1621 | 4.34  | 0.8925 |
| R1622 | 4.347 | 0.886  |
| R1623 | 4.354 | 0.8797 |
| R1624 | 4.361 | 0.8733 |
| R1625 | 4.368 | 0.867  |
| R1626 | 4.375 | 0.8607 |
| R1627 | 4.382 | 0.8545 |
| R1628 | 4.389 | 0.8483 |
| R1629 | 4.396 | 0.8422 |
| R1630 | 4.403 | 0.8361 |
| R1631 | 4.41  | 0.8301 |
| R1632 | 4.417 | 0.8241 |
| R1633 | 4.424 | 0.8181 |
| R1634 | 4.431 | 0.8123 |

|       |       |        |
|-------|-------|--------|
| R1635 | 4.438 | 0.8064 |
| R1636 | 4.445 | 0.8005 |
| R1637 | 4.452 | 0.7948 |
| R1638 | 4.459 | 0.789  |
| R1639 | 4.466 | 0.7834 |
| R1640 | 4.473 | 0.7777 |
| R1641 | 4.48  | 0.7721 |
| R1642 | 4.487 | 0.7665 |
| R1643 | 4.494 | 0.761  |
| R1644 | 4.501 | 0.7555 |
| R1645 | 4.508 | 0.7501 |
| R1646 | 4.515 | 0.7447 |
| R1647 | 4.522 | 0.7393 |
| R1648 | 4.529 | 0.734  |
| R1649 | 4.536 | 0.7287 |
| R1650 | 4.543 | 0.7235 |
| R1651 | 4.55  | 0.7183 |
| R1652 | 4.557 | 0.7131 |
| R1653 | 4.564 | 0.708  |
| R1654 | 4.571 | 0.7029 |
| R1655 | 4.578 | 0.6978 |
| R1656 | 4.585 | 0.6928 |
| R1657 | 4.592 | 0.6878 |
| R1658 | 4.599 | 0.6829 |
| R1659 | 4.606 | 0.678  |
| R1660 | 4.613 | 0.6731 |



|       |       |        |
|-------|-------|--------|
| R1661 | 4.62  | 0.6683 |
| R1662 | 4.627 | 0.6635 |
| R1663 | 4.634 | 0.6587 |
| R1664 | 4.641 | 0.654  |
| R1665 | 4.648 | 0.6493 |
| R1666 | 4.655 | 0.6446 |
| R1667 | 4.662 | 0.64   |
| R1668 | 4.669 | 0.6354 |
| R1669 | 4.676 | 0.6309 |
| R1670 | 4.683 | 0.6263 |
| R1671 | 4.69  | 0.6218 |
| R1672 | 4.697 | 0.6174 |
| R1673 | 4.704 | 0.613  |
| R1674 | 4.711 | 0.6086 |
| R1675 | 4.718 | 0.6042 |
| R1676 | 4.725 | 0.5999 |
| R1677 | 4.732 | 0.5956 |
| R1678 | 4.739 | 0.5913 |
| R1679 | 4.746 | 0.5871 |
| R1680 | 4.753 | 0.5829 |
| R1681 | 4.76  | 0.5787 |
| R1682 | 4.767 | 0.5746 |
| R1683 | 4.774 | 0.5705 |
| R1684 | 4.781 | 0.5664 |
| R1685 | 4.788 | 0.5623 |
| R1686 | 4.795 | 0.5583 |

|       |       |        |
|-------|-------|--------|
| R1687 | 4.802 | 0.5543 |
| R1688 | 4.809 | 0.5503 |
| R1689 | 4.816 | 0.5464 |
| R1690 | 4.823 | 0.5425 |
| R1691 | 4.83  | 0.5386 |
| R1692 | 4.837 | 0.5348 |
| R1693 | 4.844 | 0.5309 |
| R1694 | 4.851 | 0.5271 |
| R1695 | 4.858 | 0.5234 |
| R1696 | 4.865 | 0.5196 |
| R1697 | 4.872 | 0.5159 |
| R1698 | 4.879 | 0.5122 |
| R1699 | 4.886 | 0.5086 |
| R1700 | 4.893 | 0.505  |
| R1701 | 4.9   | 0.5013 |
| R1702 | 4.907 | 0.4978 |
| R1703 | 4.914 | 0.4942 |
| R1704 | 4.921 | 0.4907 |
| R1705 | 4.928 | 0.4872 |
| R1706 | 4.935 | 0.4837 |
| R1707 | 4.942 | 0.4803 |
| R1708 | 4.949 | 0.4768 |
| R1709 | 4.956 | 0.4734 |
| R1710 | 4.963 | 0.4701 |
| R1711 | 4.97  | 0.4667 |
| R1712 | 4.977 | 0.4634 |

|       |       |        |
|-------|-------|--------|
| R1713 | 4.984 | 0.4601 |
| R1714 | 4.991 | 0.4568 |
| R1715 | 4.998 | 0.4535 |
| R1716 | 5.005 | 0.4503 |
| R1717 | 5.012 | 0.4471 |
| R1718 | 5.019 | 0.4439 |
| R1719 | 5.026 | 0.4408 |
| R1720 | 5.033 | 0.4376 |
| R1721 | 5.04  | 0.4345 |
| R1722 | 5.047 | 0.4314 |
| R1723 | 5.054 | 0.4283 |
| R1724 | 5.061 | 0.4253 |
| R1725 | 5.068 | 0.4222 |
| R1726 | 5.075 | 0.4192 |
| R1727 | 5.082 | 0.4163 |
| R1728 | 5.089 | 0.4133 |
| R1729 | 5.096 | 0.4104 |
| R1730 | 5.103 | 0.4074 |
| R1731 | 5.11  | 0.4046 |
| R1732 | 5.117 | 0.4017 |
| R1733 | 5.124 | 0.3988 |
| R1734 | 5.131 | 0.396  |
| R1735 | 5.138 | 0.3932 |
| R1736 | 5.145 | 0.3904 |
| R1737 | 5.152 | 0.3876 |
| R1738 | 5.159 | 0.3848 |

|       |       |        |
|-------|-------|--------|
| R1739 | 5.166 | 0.3821 |
| R1740 | 5.173 | 0.3794 |
| R1741 | 5.18  | 0.3767 |
| R1742 | 5.187 | 0.374  |
| R1743 | 5.194 | 0.3714 |
| R1744 | 5.201 | 0.3687 |
| R1745 | 5.208 | 0.3661 |
| R1746 | 5.215 | 0.3635 |
| R1747 | 5.222 | 0.361  |
| R1748 | 5.229 | 0.3584 |
| R1749 | 5.236 | 0.3558 |
| R1750 | 5.243 | 0.3533 |
| R1751 | 5.25  | 0.3508 |
| R1752 | 5.257 | 0.3483 |
| R1753 | 5.264 | 0.3458 |
| R1754 | 5.271 | 0.3434 |
| R1755 | 5.278 | 0.341  |
| R1756 | 5.285 | 0.3385 |
| R1757 | 5.292 | 0.3361 |
| R1758 | 5.299 | 0.3337 |
| R1759 | 5.306 | 0.3314 |
| R1760 | 5.313 | 0.3291 |
| R1761 | 5.32  | 0.3267 |
| R1762 | 5.327 | 0.3244 |
| R1763 | 5.334 | 0.3221 |
| R1764 | 5.341 | 0.3198 |

|       |       |        |
|-------|-------|--------|
| R1765 | 5.348 | 0.3176 |
| R1766 | 5.355 | 0.3153 |
| R1767 | 5.362 | 0.3131 |
| R1768 | 5.369 | 0.3108 |
| R1769 | 5.376 | 0.3086 |
| R1770 | 5.383 | 0.3064 |
| R1771 | 5.39  | 0.3043 |
| R1772 | 5.397 | 0.3021 |
| R1773 | 5.404 | 0.3    |
| R1774 | 5.411 | 0.2979 |
| R1775 | 5.418 | 0.2958 |
| R1776 | 5.425 | 0.2937 |
| R1777 | 5.432 | 0.2916 |
| R1778 | 5.439 | 0.2895 |
| R1779 | 5.446 | 0.2875 |
| R1780 | 5.453 | 0.2854 |
| R1781 | 5.46  | 0.2834 |
| R1782 | 5.467 | 0.2814 |
| R1783 | 5.474 | 0.2794 |
| R1784 | 5.481 | 0.2775 |
| R1785 | 5.488 | 0.2755 |
| R1786 | 5.495 | 0.2735 |
| R1787 | 5.502 | 0.2716 |
| R1788 | 5.509 | 0.2697 |
| R1789 | 5.516 | 0.2678 |
| R1790 | 5.523 | 0.2659 |

|       |       |        |
|-------|-------|--------|
| R1791 | 5.53  | 0.264  |
| R1792 | 5.537 | 0.2621 |
| R1793 | 5.544 | 0.2603 |
| R1794 | 5.551 | 0.2584 |
| R1795 | 5.558 | 0.2566 |
| R1796 | 5.565 | 0.2548 |
| R1797 | 5.572 | 0.253  |
| R1798 | 5.579 | 0.2512 |
| R1799 | 5.586 | 0.2495 |
| R1800 | 5.593 | 0.2477 |
| R1801 | 5.6   | 0.2459 |
| R1802 | 5.607 | 0.2442 |
| R1803 | 5.614 | 0.2425 |
| R1804 | 5.621 | 0.2408 |
| R1805 | 5.628 | 0.2391 |
| R1806 | 5.635 | 0.2374 |
| R1807 | 5.642 | 0.2357 |
| R1808 | 5.649 | 0.234  |
| R1809 | 5.656 | 0.2324 |
| R1810 | 5.663 | 0.2307 |
| R1811 | 5.67  | 0.2291 |
| R1812 | 5.677 | 0.2275 |
| R1813 | 5.684 | 0.2259 |
| R1814 | 5.691 | 0.2243 |
| R1815 | 5.698 | 0.2227 |
| R1816 | 5.705 | 0.2212 |

|       |       |        |
|-------|-------|--------|
| R1817 | 5.712 | 0.2196 |
| R1818 | 5.719 | 0.218  |
| R1819 | 5.726 | 0.2165 |
| R1820 | 5.733 | 0.215  |
| R1821 | 5.74  | 0.2134 |
| R1822 | 5.747 | 0.212  |
| R1823 | 5.754 | 0.2105 |
| R1824 | 5.761 | 0.209  |
| R1825 | 5.768 | 0.2075 |
| R1826 | 5.775 | 0.206  |
| R1827 | 5.782 | 0.2046 |
| R1828 | 5.789 | 0.2031 |
| R1829 | 5.796 | 0.2017 |
| R1830 | 5.803 | 0.2003 |
| R1831 | 5.81  | 0.1989 |
| R1832 | 5.817 | 0.1975 |
| R1833 | 5.824 | 0.1961 |
| R1834 | 5.831 | 0.1947 |
| R1835 | 5.838 | 0.1933 |
| R1836 | 5.845 | 0.1919 |
| R1837 | 5.852 | 0.1906 |
| R1838 | 5.859 | 0.1893 |
| R1839 | 5.866 | 0.1879 |
| R1840 | 5.873 | 0.1866 |
| R1841 | 5.88  | 0.1853 |
| R1842 | 5.887 | 0.184  |

|       |       |        |
|-------|-------|--------|
| R1843 | 5.894 | 0.1827 |
| R1844 | 5.901 | 0.1814 |
| R1845 | 5.908 | 0.1801 |
| R1846 | 5.915 | 0.1789 |
| R1847 | 5.922 | 0.1776 |
| R1848 | 5.929 | 0.1764 |
| R1849 | 5.936 | 0.1751 |
| R1850 | 5.943 | 0.1739 |
| R1851 | 5.95  | 0.1727 |
| R1852 | 5.957 | 0.1714 |
| R1853 | 5.964 | 0.1702 |
| R1854 | 5.971 | 0.1691 |
| R1855 | 5.978 | 0.1678 |
| R1856 | 5.985 | 0.1667 |
| R1857 | 5.992 | 0.1655 |
| R1858 | 5.999 | 0.1644 |
| R1859 | 6.006 | 0.1632 |
| R1860 | 6.013 | 0.162  |
| R1861 | 6.02  | 0.1609 |
| R1862 | 6.027 | 0.1598 |
| R1863 | 6.034 | 0.1586 |
| R1864 | 6.041 | 0.1575 |
| R1865 | 6.048 | 0.1564 |
| R1866 | 6.055 | 0.1553 |
| R1867 | 6.062 | 0.1542 |
| R1868 | 6.069 | 0.1532 |



|       |       |        |
|-------|-------|--------|
| R1869 | 6.076 | 0.1521 |
| R1870 | 6.083 | 0.151  |
| R1871 | 6.09  | 0.1499 |
| R1872 | 6.097 | 0.1489 |
| R1873 | 6.104 | 0.1478 |
| R1874 | 6.111 | 0.1468 |
| R1875 | 6.118 | 0.1458 |
| R1876 | 6.125 | 0.1448 |
| R1877 | 6.132 | 0.1437 |
| R1878 | 6.139 | 0.1427 |
| R1879 | 6.146 | 0.1417 |
| R1880 | 6.153 | 0.1407 |
| R1881 | 6.16  | 0.1397 |
| R1882 | 6.167 | 0.1387 |
| R1883 | 6.174 | 0.1377 |
| R1884 | 6.181 | 0.1368 |
| R1885 | 6.188 | 0.1358 |
| R1886 | 6.195 | 0.1349 |
| R1887 | 6.202 | 0.1339 |
| R1888 | 6.209 | 0.133  |
| R1889 | 6.216 | 0.1321 |
| R1890 | 6.223 | 0.1311 |
| R1891 | 6.23  | 0.1302 |
| R1892 | 6.237 | 0.1293 |
| R1893 | 6.244 | 0.1284 |
| R1894 | 6.251 | 0.1275 |

|       |       |        |
|-------|-------|--------|
| R1895 | 6.258 | 0.1266 |
| R1896 | 6.265 | 0.1257 |
| R1897 | 6.272 | 0.1248 |
| R1898 | 6.279 | 0.1239 |
| R1899 | 6.286 | 0.1231 |
| R1900 | 6.293 | 0.1222 |
| R1901 | 6.3   | 0.1213 |
| R1902 | 6.307 | 0.1205 |
| R1903 | 6.314 | 0.1196 |
| R1904 | 6.321 | 0.1188 |
| R1905 | 6.328 | 0.118  |
| R1906 | 6.335 | 0.1172 |
| R1907 | 6.342 | 0.1163 |
| R1908 | 6.349 | 0.1155 |
| R1909 | 6.356 | 0.1147 |
| R1910 | 6.363 | 0.1139 |
| R1911 | 6.37  | 0.1131 |
| R1912 | 6.377 | 0.1123 |
| R1913 | 6.384 | 0.1115 |
| R1914 | 6.391 | 0.1107 |
| R1915 | 6.398 | 0.11   |
| R1916 | 6.405 | 0.1092 |
| R1917 | 6.412 | 0.1084 |
| R1918 | 6.419 | 0.1077 |
| R1919 | 6.426 | 0.1069 |
| R1920 | 6.433 | 0.1061 |

|       |       |        |
|-------|-------|--------|
| R1921 | 6.44  | 0.1054 |
| R1922 | 6.447 | 0.1047 |
| R1923 | 6.454 | 0.1039 |
| R1924 | 6.461 | 0.1032 |
| R1925 | 6.468 | 0.1025 |
| R1926 | 6.475 | 0.1017 |
| R1927 | 6.482 | 0.101  |
| R1928 | 6.489 | 0.1003 |
| R1929 | 6.496 | 0.0997 |
| R1930 | 6.503 | 0.0989 |
| R1931 | 6.51  | 0.0982 |
| R1932 | 6.517 | 0.0975 |
| R1933 | 6.524 | 0.0968 |
| R1934 | 6.531 | 0.0962 |
| R1935 | 6.538 | 0.0955 |
| R1936 | 6.545 | 0.0948 |
| R1937 | 6.552 | 0.0942 |
| R1938 | 6.559 | 0.0935 |
| R1939 | 6.566 | 0.0929 |
| R1940 | 6.573 | 0.0922 |
| R1941 | 6.58  | 0.0916 |
| R1942 | 6.587 | 0.0909 |
| R1943 | 6.594 | 0.0903 |
| R1944 | 6.601 | 0.0896 |
| R1945 | 6.608 | 0.089  |
| R1946 | 6.615 | 0.0884 |

|       |       |        |
|-------|-------|--------|
| R1947 | 6.622 | 0.0878 |
| R1948 | 6.629 | 0.0872 |
| R1949 | 6.636 | 0.0866 |
| R1950 | 6.643 | 0.0859 |
| R1951 | 6.65  | 0.0853 |
| R1952 | 6.657 | 0.0847 |
| R1953 | 6.664 | 0.0841 |
| R1954 | 6.671 | 0.0836 |
| R1955 | 6.678 | 0.083  |
| R1956 | 6.685 | 0.0824 |
| R1957 | 6.692 | 0.0818 |
| R1958 | 6.699 | 0.0812 |
| R1959 | 6.706 | 0.0807 |
| R1960 | 6.713 | 0.0801 |
| R1961 | 6.72  | 0.0795 |
| R1962 | 6.727 | 0.079  |
| R1963 | 6.734 | 0.0784 |
| R1964 | 6.741 | 0.0779 |
| R1965 | 6.748 | 0.0773 |
| R1966 | 6.755 | 0.0768 |
| R1967 | 6.762 | 0.0762 |
| R1968 | 6.769 | 0.0757 |
| R1969 | 6.776 | 0.0752 |
| R1970 | 6.783 | 0.0747 |
| R1971 | 6.79  | 0.0741 |
| R1972 | 6.797 | 0.0736 |

|       |       |        |
|-------|-------|--------|
| R1973 | 6.804 | 0.0731 |
| R1974 | 6.811 | 0.0726 |
| R1975 | 6.818 | 0.0721 |
| R1976 | 6.825 | 0.0716 |
| R1977 | 6.832 | 0.0711 |
| R1978 | 6.839 | 0.0706 |
| R1979 | 6.846 | 0.0701 |
| R1980 | 6.853 | 0.0696 |
| R1981 | 6.86  | 0.0691 |
| R1982 | 6.867 | 0.0686 |
| R1983 | 6.874 | 0.0681 |
| R1984 | 6.881 | 0.0676 |
| R1985 | 6.888 | 0.0672 |
| R1986 | 6.895 | 0.0667 |
| R1987 | 6.902 | 0.0663 |
| R1988 | 6.909 | 0.0658 |
| R1989 | 6.916 | 0.0653 |
| R1990 | 6.923 | 0.0649 |
| R1991 | 6.93  | 0.0644 |
| R1992 | 6.937 | 0.064  |
| R1993 | 6.944 | 0.0635 |
| R1994 | 6.951 | 0.0631 |
| R1995 | 6.958 | 0.0626 |
| R1996 | 6.965 | 0.0622 |
| R1997 | 6.972 | 0.0618 |
| R1998 | 6.979 | 0.0613 |

R1999 6.986 0.0609

R2000 6.993 0.0605

R2001 7 0.0601
